# Supplementary material for: The ben1-1 Brassinosteroid-Catabolism Mutation Is Unstable Due to Epigenetic Modifications of the Intronic T-DNA Insertion
Source: PubMed Central journal article supplement (PMC3755919; doi:10.1534/g3.113.006353), 2013-09-01
Supplement: supp_g3.113.006353_006353SI.pdf [file supp_g3.113.006353_006353SI.pdf]

**The *ben1-1* brassinosteroid-catabolism mutation is unstable due to epigenetic modifications of the intronic T-DNA insertion**

Kulbir Singh Sandhu<sup>\*</sup>, Pushpa Sharma Koirala<sup>\*</sup> and Michael M. Neff<sup>\*1</sup>

<sup>\*</sup>Department of Crop and Soil Sciences  
Washington State University  
Pullman, WA 99164, US

<sup>1</sup>Corresponding Author:

Michael M. Neff  
Department of Crop and Soil Sciences  
Washington State University  
Pullman, WA 99164  
Phone: 509-335-7705  
Fax: 509-335-8674  
E-mail: mmneff@wsu.edu

**DOI: 10.1534/g3.113.006353**

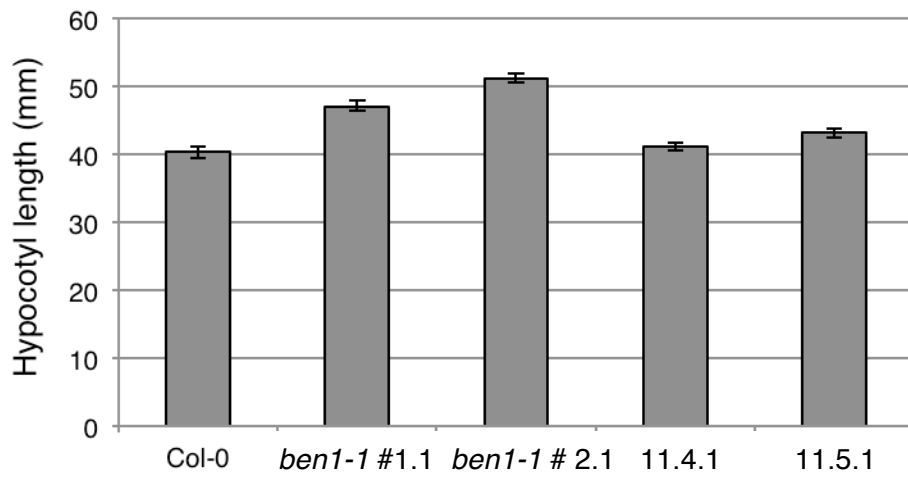

**Figure S1 The attenuated hypocotyl-elongation phenotype of the re-isolated *ben1-1* lines is stably inherited to the next generation.** The hypocotyl-elongation phenotype of progeny from the re-isolated *ben1-1* lines is significantly different from the original *ben1-1* lines ( $p < 0.05$ ). Seedlings were grown in darkness or  $9 \mu\text{mol m}^{-2} \text{sec}^{-1}$  of white-light for five days before being digitized and measured. Hypocotyl lengths were then normalized to seedlings grown in the dark and expressed as a percentage change. Error bars represent standard error (SE). To calculate SE, each seedling value in light was normalized to the average of the genotype in dark. The resulting group of values was used to calculate standard error (SE).

```

ben1_O_NPTII-F1 NNNNNNNACNTNNNNGAGCCACTCAGCCGCGGGTTTCTGGAGTTTAATGAGCTAAGCACA
ben1_R_NPTII-F1 NNNNNNNACNTNNNANGANCCNCTCAGCCGCGGGTTTCTGGAGTTTAATGAGCTAAGCACA
*****

ben1_O_NPTII-F1 TACGTCAGAAACCATTTATTGCGCGTTCAAAGTCGCCTAAGGTCACCTATCAGCTAGCAAA
ben1_R_NPTII-F1 TACGTCAGAAACCATTTATTGCGCGTTCAAAGTCGCCTAAGGTCACCTATCAGCTAGCAAA
*****

ben1_O_NPTII-F1 TATTTCTTGTCAAAAATGCTCCACTGACGTTCCATAAATCCCCTCGGTATCCAATTAGA
ben1_R_NPTII-F1 TATTTCTTGTCAAAAATGCTCCACTGACGTTCCATAAATCCCCTCGGTATCCAATTAGA
*****

ben1_O_NPTII-F1 GTCTCATATTCACTCTCAATCCAAATAATCTGCACCGGATCTGGATCGTTTCGCATGATT
ben1_R_NPTII-F1 GTCTCATATTCACTCTCAATCCAAATAATCTGCACCGGATCTGGATCGTTTCGCATGATT
*****

ben1_O_NPTII-F1 GAACAAGATGGATTGCACGCAGGTTCTCCGCGCGCTTGGGTGGAGAGGCTATTCGGCTAT
ben1_R_NPTII-F1 GAACAAGATGGATTGCACGCAGGTTCTCCGCGCGCTTGGGTGGAGAGGCTATTCGGCTAT
*****

ben1_O_NPTII-F1 GACTGGGCACAACAGACAATCGGCTGCTCTGATGCCGCGGTGTTCCGGCTGTCAGCGCAG
ben1_R_NPTII-F1 GACTGGGCACAACAGACAATCGGCTGCTCTGATGCCGCGGTGTTCCGGCTGTCAGCGCAG
*****

ben1_O_NPTII-F1 GGGCGCCCGGTTCTTTTGTCAAGACCGACCTGTCCGGTGCCCTGAATGAACTGCAGGAC
ben1_R_NPTII-F1 GGGCGCCCGGTTCTTTTGTCAAGACCGACCTGTCCGGTGCCCTGAATGAACTGCAGGAC
*****

ben1_O_NPTII-F1 GAGGCAGCGCGGCTATCGTGGCTGGCCACGACGGGCGTTCCTTGCGCAGCTGTGCTCGAC
ben1_R_NPTII-F1 GAGGCAGCGCGGCTATCGTGGCTGGCCACGACGGGCGTTCCTTGCGCAGCTGTGCTCGAC
*****

ben1_O_NPTII-F1 GTTGTCACTGAAGCGGGAAGGGACTGGCTGCTATTGGGCGAAGTGCCGGGGCAGGATCTC
ben1_R_NPTII-F1 GTTGTCACTGAAGCGGGAAGGGACTGGCTGCTATTGGGCGAAGTGCCGGGGCAGGATCTC
*****

ben1_O_NPTII-F1 CTGTCATCTCACCTTGCTCCTGCCGAGAAAGTATCCATCATGGCTGATGCAATGCGGCGG
ben1_R_NPTII-F1 CTGTCATCTCACCTTGCTCCTGCCGAGAAAGTATCCATCATGGCTGATGCAATGCGGCGG
*****

ben1_O_NPTII-F1 CTGCATACGCTTGATCCGGCTACCTGCCATTTCGACCACCAAGCGAAACATCGCATCGAG
ben1_R_NPTII-F1 CTGCATACGCTTGATCCGGCTACCTGCCATTTCGACCACCAAGCGAAACATCGCATCGAG
*****

ben1_O_NPTII-F1 CGAGCACGTACTCGGATGGAAGCCGGTCTTGTCGATCAGGATGATCTGGACGAAGAGCAT
ben1_R_NPTII-F1 CGAGCACGTACTCGGATGGAAGCCGGTCTTGTCGATCAGGATGATCTGGACGAAGAGCAT
*****

```

```

ben1_O_NPTII-F2 ACCAAGCGAAACATCGCATCGAGCGAGCACGTACTCGGATGGAAGCCGGTCTTG-TCGAT
ben1_R_NPTII-F2 ACCAAGCGAAACATCGCATCGAGCGAGCACGTACTCGGATGGAAGCCGGTCTNNGTCGAT
*****

ben1_O_NPTII-F2 CAGGATGATCTGGACGAAGAGCATCAGGGGCTCGCGCCAGCCGAACGTTCGCCAGGCTC
ben1_R_NPTII-F2 CAGGATGATCTGGACGAAGAGCATCAGGGGCTCGCGCCAGCCGAACGTTCGCCAGGCTC
*****

ben1_O_NPTII-F2 AAGGCGCGCATGCCGACGGCGATGATCTCGTCGTGACCCATGGCGATGCCTGCTTGCCG
ben1_R_NPTII-F2 AAGGCGCGCATGCCGACGGCGATGATCTCGTCGTGACCCATGGCGATGCCTGCTTGCCG
*****

ben1_O_NPTII-F2 AATATCATGGTGGAAAATGGCCGCTTTTCTGGATTTCATCGACTGTGGCCGGCTGGGTGTG
ben1_R_NPTII-F2 AATATCATGGTGGAAAATGGCCGCTTTTCTGGATTTCATCGACTGTGGCCGGCTGGGTGTG
*****

ben1_O_NPTII-F2 GCGGACCGCTATCAGGACATAGCGTTGGCTACCCGTGATATTGCTGAAGAGCTTGCGCGC
ben1_R_NPTII-F2 GCGGACCGCTATCAGGACATAGCGTTGGCTACCCGTGATATTGCTGAAGAGCTTGCGCGC
*****

ben1_O_NPTII-F2 GAATGGGCTGACCGCTTCCTCGTGCTTTACGGTATCGCCGCTCCCGATTTCGCAGCGCATC
ben1_R_NPTII-F2 GAATGGGCTGACCGCTTCCTCGTGCTTTACGGTATCGCCGCTCCCGATTTCGCAGCGCATC
*****

ben1_O_NPTII-F2 GCCTTCTATCGCCTTCTTGACGAGTTCTTCTGAGCGGGACTCTGGGGNN-GAAATGAAAG
ben1_R_NPTII-F2 GCCTTCTATCGCCTTCTTGACGAGTTCTTCTGAGCGGGACTCTGGGGNNCNAATGAANN
*****

```

**Figure S2** *NPTII* gene sequence did not change in the pre-triple and post-triple *ben1-1* mutants. The *NPTII* gene was amplified using NPT-Fv1, NPT-Fv2 and NPT-Rv from the pre-triple and post-triple *ben1-1* lines. Primers NPT-Fv1 and NPT-Fv2 were used for sequencing *NPTII* gene (Table S1). The color coded yellow nucleotides show the complete *NPTII* coding region in the sequence.

(A)

```

ben1_O_pBEN1_BST GGAATTTAATAATAATGTTTGTAAATAAATGGATAAAGAATGTGAATTATTTATATAAAATG
ben1_T_pBEN1_BST GGAATTTAATAATAATGTTTGTAAATAAATGGATAAAGAATGTGAATTATTTATATAAAATG
Col-0_BST GGAATTTAATAATAATGTTTGTAAATAAATGGATAAAGAATGTGAATTATTTATATAAAATG
Col-0_no_BST GGAATCCAATAACAATGTTTGTAAATAAACGGACAAAGAATGTGAATTATTCACATAAAATG
*****

```

```

ben1_O_pBEN1_BST ATTTGTAAAATGTGAGTATTTGATTATAATGGATATAATAAAAATAAAAATTGTAATAAAG
ben1_T_pBEN1_BST ATTTGTAAAATGTGAGTATTTGATTATAATGGATATAATAAAAATAAAAATTGTAATAAAG
Col-0_BST ATTTGTAAAATGTGAGTATTTGATTATAATGGATATAATAAAAATAAAAATTGTAATAAAG
Col-0_no_BST ATCTGTAAAATGTGAGCATTGATTATAACGGATATAATAAAAACAAAATTGTAATAAAG
**

```

```

ben1_O_pBEN1_BST AGAGAAGAGGGTAAAATGGGGAATATGTTATGTGGATAGGTGTGAGAGAGTAAATGATGT
ben1_T_pBEN1_BST AGAGAAGAGGGTAAAATGGGGAATATGTTATGTGGATAGGTGTGAGAGAGTAAATGATGT
Col-0_BST AGAGAAGAGGGTAAAATGGGGAATATGTTATGTGGATAGGTGTGAGAGAGTAAATGATGT
Col-0_no_BST AGAGAAGAGGGCAAAACGGGGAACATGTCACGCGGATAGGTGTGAGAGAGTAAATGACGT
*****

```

```

ben1_O_pBEN1_BST AGGTTTTGTTATTTAAGAATTTTTTTAGAGAGGTTTTTATATAT-AGNNG-----
ben1_T_pBEN1_BST AGGTTTTGTTATTTAAGAATTTTTTTAGAGAGGTTTTTATATATTAGAAGAGAGAGAAAG
Col-0_BST AGGTTTTGTTATTTAAGAATTTTTTTAGAGAGGTTTTTATATATTAGAAGAGAGAGAAAG
Col-0_no_BST AGGTTCCGTTATTTAAGAACCCTTCTAGAGAGGTCCC-ACACACCAGAAGAG-----
*****

```

```

ben1_O_pBEN1_BST -----
ben1_T_pBEN1_BST AGATAGAGAGAAAATGGTG
Col-0_BST AGATAGAGAGAAAATGGTG
Col-0_no_BST -----

```

(B)

```

ben1_O_Ex2_BST GGTGGTGTGTTGAGTTTGGTGGGAAGAATGGGTTAGAGGTTGTGATGTTTGTATTTTTTTT
ben1_T_Ex2_BST GGTGGTGTGTTGAGTTTGGTGGGAAGAATGGGTTAGAGGTTGTGATGTTTGTATTTTTTTT
Col-0_BST GGTGGTGTGTTGAGTTTGGTGGGAAGAATGGGTTAGAGGTTGTGATGTTTGTATTTTTTTT
Col-0_no_BST GCGGCGCTTGAGTTCGCTGGGAAGAATGGGTTAGAGGTTGTGACGCTCGTTATTCCCTCT
**

```

```

ben1_O_Ex2_BST TGTTGTTGGATTTTTTATATTTTTTGTGTTGTTTTTTTTTGTTTTTTATATTTTTTGTAT
ben1_T_Ex2_BST TGTTGTTGGATTTTTTATATTTTTTGTGTTGTTTTTTTTTGTTTTTTATATTTTTTGTAT
Col-0_BST TGTTGTTGGATTTTTTATATTTTTTGTGTTGTTTTTTTTTGTTTTTTATATTTTTTGTAT
Col-0_no_BST CGTCGTCGGACCTTTTATATCTTCGTCGTTGCCTTCCCTCCGTCCTTCATATCTCTGCCAT
**

```

```

ben1_O_Ex2_BST GTTTTTTG/GTATTTAA
ben1_T_Ex2_BST GTTTTTTG/GTATTTAA
Col-0_BST GTTTTTTG/GTATTTAA
Col-0_no_BST GCTCTTTG/GTACTTAA
*

```

**Figure S3** Genomic DNA in the *BEN1* Promoter and *BEN1* 2<sup>nd</sup> Exon-Intron junction does not show any methylation in both the pre-triple *ben1-1* and the *bas1-2 sob7-1 ben1-1* triple-mutant lines. (A) *BEN1* promoter DNA was amplified using primers pBEN1-BS-F and pBEN1-BS-R from the bisulfite converted genomic DNA from the Col-0, pre-triple *ben1-1* and the triple-mutant lines. (B) *BEN1* DNA from the 2<sup>nd</sup> Exon-Intron junction was amplified using primers BEN1-E2-BS-F and BEN1-E2-BS-R from the bisulfite converted genomic DNA from the Col-0, pre-triple *ben1-1* and the triple-mutant lines. BST= bisulfite treatment. ben1\_O= pre-triple *ben1-1*, and ben1\_T= *bas1-2 sob7-1 ben1-1* triple-mutant.

Bisulfite *BEN1* 2<sup>nd</sup> exon raw sequences

ACCAGAAGAGAGAGAAAAGAGACAGAGAGAAAATGGTGAGAGAAGAACAAGAAGAAGATGACAACAACAACAACAACCGGAGG  
 AGGAGAGAGAAAGCTGCTTGTGGCTGATGAAACGGTGCCGCTTTGTTGGACGAAACGGGGTTGGTTTGTGTAACGGGAGGTTCTG  
 GTTTCGTTGCTTCTGGCTCATCATGCGTCTCCTTCAACGTGGCTACTCCGTTCCGGCCACGGTTCGAACCAACTCAGGTTTCGAGTTAA  
 TTAACCTCACTTTCTCTTACTTATACACTTTGAATCATCATCACTGATTAAGCAAATGCCAATAAAATTATTGTTGTCATATATGGCTGA  
 TTGGTCCGTTTTAACATAAAGTACATAAATAGAAAGATAGATTATAGTTTTTTTTTATATATAGAGAGAGATAACATTTAAAGTTGAT  
 TTTTGGATCGACAATTAATAATATATATATTTTTATGGATGTGAAAATTTATTGACTTGGCTGGAATTATCTGTCAGTTTGTAGGAT  
 CTTGAAGCTTCATAGCTATGTAAATATGTCATGTTCCATGCATCTTCTATAGAAAGTCAACCATATATTTTATGATCAATAACTAATAA  
 GTAATCACGGACCATAAGATATAAATGAAGTTAATAATTCATAAGTTTGTATTTTATGTCATATTACAGAAAGGGAATAAGAAAGATA  
 TAAGCTACCTAACCGAGCTACCATTTGCATCGGAGAGGCTTCAAATATTCACCGCCGATCTCAACGAACCGGAGAGCTTCAAACCGG  
 AATCGAAGGATGCAAAGCCGATTCCACGTGGCACATCTATGGACCCAAACAGCAACGAAACAGAAGAGACCGTTACGAAACGTA  
 CTGTGCAAGGTCTCATGGGGATACTAAAGTCGTGTTGGACGCTAAAACCGTGAAACGTTTTTCTACACGTCAAGCGCCGTGACTGT  
 TTTCTATAGCGGTGGAAACGGCGGTGGAGGAGGCGAAGTAGACGAGAGCGTTTGGAGCGACGTGCGAGGTGTTTAGGAATCAAAG  
 GAGAAGAGGGTGAGTAGCTTACGTCGTGTCGAAAATGGCGGCGGAGACGGCGGCGCTTGAGTTCGGTGGGAAGAATGGGTTAG  
 AGGTTGTGACGCTCGTTATTCCTCTCGTCGTCGGACCTTTATATCTTCGTCGTTGCCTTCTCCGTCTTCATATCTCTCGCCATGCTCTT  
 TGGTACTTAATTCTCATATCTAATAAGTTTTTATTTTATTTTCTCCATGATTAATAACTAAAGCTGAAAATTAATAATTTAAAAACTTAA  
 CCACTTTGATTACGTATACGTTATATATAGGTATTAATTTTAAAACTAACCAAACCTTTATTTCTCAAATAAAGTAAAGTAAATTCAT  
 AGTACTAGCCTACTAGCTAGCTTGTACTC(insertion)TAGTAGTAGTTAAATGGTTTATGGTTGGTTCACCAAGTATCTTGGGAGATCA  
 TAGCTCGAATTTTCTCAAAAAAAAAATTTTGAACAAATGCTCGAATTTTCTCATTATACTTTTGTTTAAATGAAAAAAAAATTTCTGC  
 TCAGGCTTAGTAGATTTATGTTTGGACATAGTGGCTATTGAAAATGTTAGAATTCGAACCAAATATGTATATTTTATACGAAAAAAC  
 AGAACTAAAATCCTAATTACTATACGTAATAAATAAATCTTTTCTTTGCTTATAACCTACGTGCGTGGAAATTTTGTAGTTATTTAGA  
 ACGAATTTTGTGTGTGTTAACTCGTGTAACATGTGCTAATAATATTACAAATAGTGTGTTTGTAGTAATAATCACTATTCATATAGT  
 AATATTACGTTTTTTTATGAAGGAAATTACAAGGAGAAGTATTTGTTTGTACTTACAATATGGTGCATATTGATGATGTGGCAAGGG  
 CGATGATATTTCTATTAGAAAAGCCAAGTTGCAAAAGGTAGATATATTTGTTTCGTCGGTGGAGATGAAGATCGATGAGGTCTTTGAGT  
 TTTTGTCTACGAAATTTCTCAGTTTCTCAGCTACCTTCAATAGAGTATGTCATTTTTTACTAGTATAATTAATTTACGTGTAATATTCTA  
 TTGTTTTTTTCCAAGAGTTTTTATTATGTTCTTTTTTGTGTGGGTACGTAAGTTTGAATAAATATAAAGTAGAGAAGAGGATGGGTC  
 TTTCATCGAAGAAGCTGAAAAGTGCCGGGTTCAAGTATGGAGCCGAGGAAATATTCAGTGGAGCTATAAGGAGCTGTCAA  
 GCAAGGGGATTTCTTTAAATTTATGAGGATTTTGTGTTAAATTTGTATATGAATTGAAAATATGTTTTTCTTTATTGGCCATTTCC  
 GTTTTGTAACATGTTCTAGTACTTGTGACGAAAAAAAAAAGAAAGTGTGTTTATTGATTGAG

BLUE=Exons; Black=Introns

### Primers:

BEN1-E2-BS-F: TTAGGAATTAAGGAGAAGAG

BEN1-E2-BS-R: AATTAATACCAAAAAACATAAC

### Replicate 1

>PK\_329142-505\_11\_BS3\_E04.ab1/>Col-0\_BST  
 NNNNNNNNNNNNGNTGTGTTGANTGGTGGTGGAGATGGTGGTGTGTTGAGTTTGGTGGGAAGAATGGGTTAGAGGTTGTGA

TGTTTGTATTTTTTTTGTGGATTTTTATATTTTTGTTGTTGTTTTTTTTGTTTTTATATTTTTTGTATGTTT  
TTTTGGTATTTAATTAATCCANCCGTNTCANNAGCAACTTGNCCNNNNNACCCCCCGAACGNCTCANNNTCCCCCTCCC  
CGCCCCCAGCTACNAACNCTCATCCNAAGGCTCCANCTAAAACCGTGACTNNCTNCCGTCCCAATTAAGAANGTG  
TCTCNNTAAACAAANNTGCNCCCNANGACCACCGGTGTCAAACACTTCACTCNTNNAACCTGAAGCCAAANAATCATN  
GCCTCNNTTNTGACCCNAANCTCGGAGGGACGCCNTNATATNNNANCTTCCCNCTCCTCTCCCCNCTTACCCGAN  
ACNNAANCCCGACTGCCCCNTCNACNTTCTCAGCCTCCGACAGCGACGCGTATTGATCTCCNCTTTAACTCCCNCTC  
ACNCACTCTTNGGGTCATNNACCCNCTNCNCCNNNNNTNNAGTTTGTAATTATCTCAGGCCCA

>PK\_329142-506\_12\_BS3\_F04.ab1/>ben1\_O\_Ex2\_BST

NNNNNNNNNNGNTGTGTTGANTGGTGGTGGAGANGGTGGTGGTTTGGAGTTTGGTGGGAAGAATGGGTTAGAGGTTGTGA  
TGTTTGTATTTTTTTTGTGGATTTTTATATTTTTGTTGTTGTTTTTTTTGTTTTTATATTTTTTGTATGTTT  
TTTTGGTATTTAATTANCCAACNACNANCCNNTNNACCCATAACCCCNANNTNCTCGTACNCCCCCNCC  
NGNCCCCCTCNCNNGAACNCCCAGCCCCGACGGGTCCATCNTANGNCNCGACGGCCCGCGGTGCCAGATANCCAATGG  
GCTNCCNAATGAAACNCAACNCCNAGNCCGAGCAGNTCAAACGNCCNCCATCCACNGNAAAGGACGAACANCA  
NANNCTCTATCTGGCCNCCNGTNNGCCNNGNCCGCTCACNGTCCACCACCNACNCAACCCNCTATNCCNATCAAG  
ACACNCCNACNACCTGCGNCTGTCACTCCAGGCNCCNACANCGCCGNCCTAGNGCGCTCTCTCNAGCTCCCCCAC  
ATCNNTTCTGAGNTACNANCCACCTGCNCTCCCCNCGATTNCCATNACAANAGCCNAT

>PK\_329142-507\_13\_BS3\_G04.ab1/>ben1\_R\_Ex2\_BST

NNNNNNNNNNGNTGTGTTGANTGGTGGTGGAGATGGTGGTGGTTTGGAGTTTGGTGGGAAGAATGGGTTAGAGGTTGTGATG  
TTTTGTTATTTTTTTTGTGGATTTTTATATTTTTGTTGTTGTTTTTTTTGTTTTTATATTTTTTGTATGTTTTT  
TGTTATTTAATANCCAANCGCCTTACAGCAACCTGGCCCCAAAACCCCTTCGAATGCCTCTCNTCAACCCCTCCTCT  
CCCCNACNCTANNNCNACCCNACTCCNGCGGCTCCANCCAACANNCTTCCNCCNCTCCCCATCTNANCCGGCCTT  
CNCNNNNAACATGATCCNCCNANGGCCNANGGCGNCAANACCGCATCCCTCCATGGNNGAAGCTTGACCATCACNGAC  
TCAATATCTGACTCCCAGCCCCGAGAGAGGGCCGCAACNTCACCCCCACCCGCCNNAACCCCCCATNNTTCTCGATAC  
NGATCCATGNCTGCGACTTGCCCTTTCCTTGAGTGCNATCGCGGTGCGTAGTGTACTCTCCNACTTCGCCCTGCA  
CACACTCATTTNNTTTACTANNATGATCNNTNNTCCNCCNCCNCCNCAATTATCNCAAGGCACCATTNNAANNN  
AA

>PK\_329142-508\_14\_BS3\_H04.ab1/>ben1\_T\_Ex2\_BST

NNNNNNNNNNGNTGTGTTGANTGGTGGTGGAGATGGTGGTGGTTTGGAGTTTGGTGGGAAGAATGGGTTAGAGGTTGTGA  
TGTTTGTATTTTTTTTGTGGATTTTTATATTTTTGTTGTTGTTTTTTTTGTTTTTATATTTTTTGTATGTTTTT  
TTTTGGTATTTAANNNNCCNCCNCCNCCNCCNCCNCCNANTCCCCNCGNANGCNCTCNTCCCTCCCCCTCCTCN  
CCCCACTCTTNCNCCNCCNCCGACCCNACGGCTCCANCCNACGATCNTTCCCCCNCCNCCNCTTCGCAGANGGNNAGN  
CNNACCCNAAACATGATCCCCCAGGGCCAAAAGGCGTCAAAGACAGCTTCCNCGCANGGNNAAAGNATGACAATCACCCAC  
TCAATATCGGACCCCCAGCCCCGANAGAGGCCCCCAACTTCACCCCCCCCGCCNCGACCCCTTNTNCGTTNCCCCGACC  
CTGANNCACGGNCCCAGCTTGCCCTTCCATTGAGTGAAATCGCGCTGCGTACCAGCCACTCCTCACACCTCNCNCCGCA  
CACTACNTCCGNTTACCAANNNNATCCGTCNNNCCCTCANNTCNCCNATTATCACAGGCCCATTNANNNNNNN  
N

>PK\_329142-519\_11\_BS4\_E06.ab1/>Col-0\_BST

NNNNNNNNNNANNNAAAAATATAAAAAATCCAACAACAAAAAAATAACAAACATCACAACCTCTAACCATTCTTCCCACC  
AAACTCAAACACCACCATCTCCACCACCATTTTCAACACAACATAAAAACTACTACCCTCTTCTCCTTTTAATTCTTA  
AANNGGNNGNNAACNNNANGGNNNTGNNTNCCNATACTNCTCCGGGNGAGCGAGACTACGCTATNTGNTGAGAGGAGT  
TGTTNGAGCGAAATNCCATNANAAAAAGGACAT

>PK\_329142-520\_12\_BS4\_F06.ab1/>ben1\_O\_Ex2\_BST

NNNNNNNNNNANNNAAAAATATAAAAAATCCAACAACAAAAAAATAACAAACATCACAACCTCTAACCATTCTTCCCACC  
AAACTCAAACACCACCATCTCCACCACCATTTTCAACACAACATAAAAACTACTACCCTCTTCTCCTTTTAATTCTTA  
AAANGTANGNNGAGGGCTNNGNNGGTGAGTGACCATCTTCTTCTGGAGGACGTGCCAAAANTTTACTCCTAANCNAGG  
TGATTTNCGAGGGCCACCCATGGNGAANCNATCGAGTTGAGGGGCATCCTCTTCNAGGAGGACAGAAANNTCN

>PK\_329142-521\_13\_BS4\_G06.ab1/>ben1\_R\_Ex2\_BST

NNNNNNNNNNANCANNNAAAAATATAAAAAATCCAACAACAAAAAAATAACAAACATCACAACCTCTAACCATTCTTCC  
CACCAAACTCAAACACCACCATCTCCACCACCATTTTCAACACAACATAAAAACTACTACCCTCTTCTCCTTTTAATTCT  
CTAAAANNNGANGGNGTANGGNGGANCTTGTCTTACATNCTNCGGGCNCCTGCTNNTGACTCCANCNCTGGGCCCCG  
TGTTTTCCGGCNATCCCATGNACAATAGNNCACCGAGTACCAGGAAATGTTCCTGCCCANGCTTGAACCNNGTCNGATCNC



ATTGGTGAANACNANATTACGAACANTCTCNAGTCANCTATTTTTNGTGTTACGGACTAANAGNATCANNGTANNCTTCTA  
AATTGTCCACNACAACCNAGNANGTTCNCCACGGTCGCTCATCGGCCCGGGCTACCCTCANNCTGCATACAGACTGAT  
TGGATGACNCAACATCCTNNNTTGGATGAAGGCGATATTCNAGATTAGNTACNTAATGCTNANTCTTAANTCTCTCANAC  
TGNTGCATTGGGGACNTAANGCNCATGCTCTCTNTNCCTAGNCGAACNACTATAACCTTCNTCTGN

>PK\_329142-522\_14\_BS4\_H06.ab1/>ben1\_T\_Ex2\_BST  
NNNNNNNNNNNNNNNANNNAAAAAATATAAAAAATCCAACAACAAAAAAATAACAAACATCACAACCTCTAACCCATTCT  
TCCCACCAAACCTCAAACACCACCATCTCCACCACCATTTTCAACACAACATAAAAACTACTCACCTCTCTCCTTTTAA  
TTCCTAAATNNGCCNGNGGGTTNGNGGGGNGGGGNCGGTCTTCTCNGGGATGGGNCNGACTNACNNGCTGTGAANGTGGT  
TTCGGGNNATACNCCCNGGAGAACCACATCGCTCTGAGGGGCATCCTCTGGAGGANANCGAAACGTCTGGGGGAGNNG  
TGGAGTACAANNNGANNNACCACAGCNTTANCNTGNTGGCGGACAAGAATAAGGGTNGCATTTTGTGAAC TTCATGATC  
CACCTGTACTCGAAGGCTGGTGTGTAGCTNANCNACCNTGCCTACAGCTCAGCCCNNGGANNGACCGGCCCTGGTGGC  
GGCCCGAACTNNTTNCCTGATC

ben1\_O\_Ex2\_BST GGTGGTGTGGTTGAGTTTGGTGGGAAGAATGGGTAGAGGTTGTGATGTTGTTATTTTTT  
ben1\_T\_Ex2\_BST GGTGGTGTGGTTGAGTTTGGTGGGAAGAATGGGTAGAGGTTGTGATGTTGTTATTTTTT  
Col-0\_BST GGTGGTGTGGTTGAGTTTGGTGGGAAGAATGGGTAGAGGTTGTGATGTTGTTATTTTTT  
Col-0\_no\_BST GGCGGCGCTTGAGTTCGGTGGGAAGAATGGGTAGAGGTTGTGACGCTCGTTATTCTCT  
\* \* \* \* \* \* \* \* \* \* \* \* \* \* \* \* \* \* \* \* \* \* \* \* \* \* \* \* \* \* \* \* \* \* \* \* \* \* \* \*

ben1\_O\_Ex2\_BST TGTTGTTGGATTTTTTATATTTTTGTTGTTGTTTTTTTTTTGTTTTTATATTTTTTTGTTAT  
ben1\_T\_Ex2\_BST TGTTGTTGGATTTTTTATATTTTTGTTGTTGTTTTTTTTTTGTTTTTATATTTTTTTGTTAT  
Col-0\_BST TGTTGTTGGATTTTTTATATTTTTGTTGTTGTTTTTTTTTTGTTTTTATATTTTTTTGTTAT  
Col-0\_no\_BST CGTCGTCGGACCTTTTTATATCTTCGTCGTTGCCTTCCCTCCGTCTTCATATCTCTCGCCAT  
\* \* \* \* \* \* \* \* \* \* \* \* \* \* \* \* \* \* \* \* \* \* \* \* \* \* \* \* \* \* \* \* \* \* \* \* \* \* \* \*

ben1\_O\_Ex2\_BST GTTTTTTG/GTATTTAA  
ben1\_T\_Ex2\_BST GTTTTTTG/GTATTTAA  
Col-0\_BST GTTTTTTG/GTATTTAA  
Col-0\_no\_BST GCTCTTTG/GTACTTAA  
\* \* \* \* \* \* \* \* \* \* \* \* \* \* \* \*

**Replicate 2**

>PK\_329142-511\_17\_BS3\_C05.ab1/>ben1\_O\_Ex2\_BST  
NNNNNNNNNNNGNTGTGTTGANTGGTGGTGGAGATGGTGGTGTGTTGAGTTTGGTGGGAAGAATGGGTAGAGGTTGTGA  
TGTTTGTTATTTTTTTTTGTTGTTGGATTTTTTATATTTTTGTTGTTGTTTTTTTTTTATTTTATATTTTTTGTATGTTT  
TTTGGTATTTAATTANGAANCNTATGGACTGGACCCNACCNCCTTCTCCGAANCNNTCCNCCNNTCTGNTGAAC  
CTACTTCTCGCGCANCCACCTNATTAANCCNCCNNTCNATATGCCCTNACCNCCTNCAAANACTATANCCTCNG  
GGNGCCCCNGGTCCCTNTCCTNNTGCCNCCNCCACTTNTCCNCCNCCNCTACTNNAATATGCNCTNNTGGTATATT  
ACTAGNATATNACCNNNTATNNTGCNT

>PK\_329142-512\_18\_BS3\_D05.ab1/>ben1\_R\_Ex2\_BST  
NNNNNNNNNNNTGTGTTGANTGGTGGTGGAGATGGTGGTGTGTTGAGTTTGGTGGGAAGAATGGGTAGAGGTTGTGATG  
TTTGTTATTTTTTTTTGTTGTTGGATTTTTTATATTTTTGTTGTTGTTTTTTTTTTGTTTTTATATTTTTTGTATGTTTTT  
TGGTATTTAATAAATACNNNNNTTTAAGGATGTTTTTGAAACGGTCTNCTTCGGGTCGGGGTCCCGCCGCTGCTTNGTA  
AACGTAGTTNGTNNACCNCNCCTCCCTNGNACCACGCCANATCNACNTGTTCCTNACTCTCCACCAAGNN

>PK\_329142-513\_19\_BS3\_E05.ab1/>ben1\_T\_Ex2\_BST  
NNNNNNNNNNNTGNTGTGTTGANTGGTGGTGGAGATGGTGGTGTGTTGAGTTTGGTGGGAAGAATGGGTAGAGGTTGTGA  
TGTTTGTTATTTTTTTTTGTTGTTGGATTTTTTATATTTTTGTTGTTGTTTTTTTTTTGTTTTTATATTTTTTTGTATGTTT  
TTTGGTATTTAATAAATACCCACCAATTTCCGANNNNNNTTNCNNTCTTCTTCNGGGNGGNGCGANTGCTCTNCTTGT

GTGNTTTTTTTTTGAGTGCCACCCCTTTTAAATACGACATCTCTTTNTGTATCGNANTCGTCTTCTTNTTGN

>PK\_329142-514\_20\_BS3\_F05.ab1/>ben1\_T\_Ex2\_BST

NNNNNNNNNGTTGTGTTGANTGGTGGTGGAGATGGTGGTGGTTTGGAGTTTGGTGGGAAGAATGGGTTAGAGGTTGTGATG  
TTTGTATTTTTTTTTGTTGTTGGATTTTTTATATTTTTGTTGTTGTTTTTTTTTGTTTTTATATTTTTTGTATGTTTTT  
TGGTATTTAATAANNCCNCCGCTACGTCCAGGAGCANNACCNTCTNTCTCCGGACCACGGCGACTCCGCTACCTGCTCC  
GACGTGTTNTTCGAGGGCCACACCCTGTTGAACCGCNCNCGCTGAATGGTACCNACTTCNNNCATGACNGCNACATCCT  
GGGGCTAANNNTGGANTNNCCTACNACAGCCACAANNCTATATCCTGTTTCNATTCNNTGAAGAACAGCANCNCNGTGAA  
CTTCTNNATCCNCCNCCNCCNCCNCTAAGGTTCCNTCTNANNNNNNACCNCTTNCNCAACNCTCCCCTCGTNGACGG  
NCCCCTGNTGCTGCCCGCAACCCTATCTGANACCCCTNCCTCCCTGAGTTNTATTTTTANNATN

>PK\_329142-525\_17\_BS4\_C07.ab1/>ben1\_O\_Ex2\_BST

NNNNNNNNNNNNNNNNNNAANTATAANANATCCAACANNNNAAAAATAACAAACTTCCCATCCTCTAACCATTCTTC  
CCACCAGACTCAAACACCACCATCTCCACCACCATTTTCAACACAACATAAAAACTACTCACCTCTTCTCCTTTTAATT  
CCTAAAANGTNNNNCCGNCCNTGGNCNGNCCGGCATGNATATNNTGCGGGTGGNGCTGACCGTGTCTGNTGNNTGANC  
GTTTNGTTGATCTGCNCCCTGGCCATGNGAANGGACCTTGTTCTACTGTAACCNTGTNCTGCTGCNACAACCGNNNG  
GGACCCACNGTGTGTGAAATNGCTGGTGCATAGNGCCGGCTAAATGCACTNCTCGTTGGNNGACNACTCCCATGTTGGGC  
CCCAAGCCACCNTGCTTGATGACTTCTCNCCTGCTCGCCCTGCTGGTNGCTCTGTTTGNCTGCTGGTTGANTGNCCG  
GNCCNCCACCGTACCNACTTGGNACAAACAGACNGNATATGACGNCANTCTCTTACANGCTCCATTNGTTNNGAATTGN  
GTCTTTNTCTNCTNTCTCTCAACCGTGTNTACTNCCATTGCTCGTGCNGGGCTCCTGCCACCTCGNGATGTCGGAC  
TNCNANAATAATGTANTTTANCNNTGCCTATTNATNTCTNTGCGNTAAACCNCCTGCTACGCCAGGTG

>PK\_329142-526\_18\_BS4\_D07.ab1/>ben1\_R\_Ex2\_BST

NNNNNNNNNNNANAANAATAATAAAAAATCCAACAACAAAAATAACAAACATCACAACCTCTAACCATTCTTCCC  
ACCAAACTCAAACACCACCATCTCCACCACCATTTTCAACACAACATAAAAACTACTCACCTCTTCTCCTTTTAATTCC  
TAAAANGTAAAGGGTGTGNNCTCNGCCGGCANGGCCATCCTNTGCGAGAGGCGGACCCTGTGCTGTTGAGTGAACGAAC  
TGNTGAGCTGCGCCCTGCCTNNTAGGNATGTGANCNCCTTCNNNGCCAACNCCNNGNCTAGTNCATAACNNCATTNAG  
CCCCTGNGGATGAGCTNNGNGGGGGGAGCANCNCCCTATTANCACTANTCGTTAGATCANGACTCGNATGTGGTACGAG  
ATTACACCGTGTGTTGAGGGCTGCCCATGATCNGCGTCTGGAGGCCCTGCTNNATCGTTGNTGTACATANNAGGCCTCT  
CNTGCACCGGCTGCTGANAAGAAACAGGCTCCCTGGACAGGCTGGNACTAATGNCCAGGATCGTGTTCCTGATCAAATGG  
ATGTTTATCTGGCTCTCTCTGTGCTGTCTGCTCACTCCATTGCGCGNGCTTGGACNCCCCNTGNTGNNAGGNNGTNN  
NAAAGNAACTGNNNNCNANCCNTGCCTGNNCTGNTCCNGGGNCCNNTATGCTGCTGNTNNGNAGN

>PK\_329142-527\_19\_BS4\_E07.ab1/>ben1\_T\_Ex2\_BST

NNNNNNNNNNNNNNNNAATAATAAAAAATCCAACAACAAAAATAACAAACATCACAACCTCTAACCATTCTTCCC  
ACCAAACTCAAACACCACCATCTCCACCACCATTTTCAACACAACATAAAAACTACTCACCTCTTCTCCTTTTAATTCC  
TAAAANGGGTAGAGCGNCCATGATCTCNGCCGGCGGNGGATCCTGGGCGGGTGGGGACCCTGCGCGGCTGGGTGAACG  
GGCTGGGGTGTGCCCCCTGCCGNTGTGGTAGGTNACCGCCTTGTTGCTTAATTATCGGGGTGGATGNTNGGTGTGG  
GAAGGCCAGNGGATGAGNTGTGCGGTGCNCCGCNCCGGNCAGAGTCTNCGANGGTGNGGACAGCAGCNGGATGTGCC  
CTGGACGCGCAGGCCGAAGAGGACTGCGCGTGTATCACCNGCTGGTGGCCCTGTTTCNNCTGATGGTGTNCATGGCNGC  
NCTCATNTGCACCACCAGNGCGCAGGACAAAGACAGCCAGGCCAGGCTGGCGCTGACCACCGGCCTCGTGTTCGTGATCN  
NNGGGTGTGAACTGATCACGCTGAGCTGGGCGCCNCTCCATGATCACGTACTTCTNTATTGCCGTGTGGNNTANN  
GNAGNANNANNAAGNNGNNGTNTACACGTNNCTGTGCTGGTGCNCGGTGCTCAGNTGNTGCTNNGNNTGGTTGGNCNN  
NNGTTGNTTCGNNNTTNGCANNANGNNNNGGCCANCANACNGGCNCCATCTACACGANANGTGCAGAGCCGCTNNN  
GANGNCCCANGGNANNNNGNNGGNTNNN

>PK\_329142-528\_20\_BS4\_F07.ab1/>ben1\_T\_Ex2\_BST

NNNNNNNNNCCNANNANNAATAATAAAAAATCCAACAACAAAAATAACAAACATCACAACCTCTAACCATTCTTCC  
CACCAAACTCAAACACCACCATCTCCACCACCATTTTCAACACAACATAAAAACTACTCACCTCTTCTCCTTTTAATTCC  
CTAAAANNNTGGCTGGGNTGATNTGGNNGGTGACGGAATGGTCTGCGCCGGCATGCCATCCTGGGCGTGGTGGTGANCT  
GCTGGGCTGGGCGAACCGCCTGGTGTGAGCTGCGCCTTGTCTATGTGGAATGTGACCTCCTTCNCTCNGCAACAACCTCNTGG  
TGGCCCAGGTGGTGTGGGAGGGCCTGTGGATGANCTGNGNGGTGCANANACCGGCGGATGCANTGTNNGNNTAGGACC  
CTCTGCTGGNCTGCCNAGGACCTGNANGANCAACAGCCCTGTGGNTGATCNNCTGCTGGTGGNCCTGTTCGGCCTGN  
TGGTGTACCTGGACGGCGCTAGGTGCAACAANTGCGTGCAGGATAACGATATCCACGNCAANCTGGTGGCNACTGGCGCN  
NTCCTGTTTCGTGATCACGGCGAGCTGACCCNCTCNCNGTGNCTNGAGCNCNCAACNCTGCCNTCTGGGAGTCTGNNC  
ANGCTGNNGGTGNAGNCNACACCNANGCANNNTNGCTGNCCGNTGTACTTGNNGNCACTCNANCGNNN

Bisulfite sequences of the *BEN1* promoter

ccattccatctcattcacgcggttttattttctctcattcatattaattatatattaatcacacaatcctaataatatcccttaatctatgcct  
 agaacatgcatggtattataattaatacattcgacaccactagaagccaaaagtatatagtagtaaaaaaaaaagaagaagaagctgggttgtagct  
 aagaatgaaaataacggaatccaataacaatggttgtaataaacggacaaagaatgtgaattattcacataaatgatctgtaaaatgtgagca  
 tttgattataacggatataataaaacaaaaattgtaataaaagagagaagagggcaaacggggaacatgtcacgcggataggtgtgagagagt  
 aatgacgtaggttccggttatttaagaacccttctagagaggttcccacacaccagaagagagagaaagagacagagagaaaATGGTGAGAGA  
[AGAACAAGAAGAAGATGACAACAACAACAAC](#)

**Primers:**

pBEN1-BS-Fv: 5'-GTATAGTAGTAAAAAAAAGAAGAAGAAG-3'

pBEN1-BS-Rv: 5'-CTTRTTCTTCTCTCACCATTTTCTCTCT-3'

(RC=reverse compliment)

**Replicate 1**

>PK\_328409-528\_5-R\_Primer-D\_A02.ab1/>Col-0\_no\_BST  
 NNNNNNNNNNCTCTTCTGGTGTGTGGGACCTCTCTAGAAGGGTTCTTAAATAACGGAACCTACGTCATTTACTCTCTCA  
 CACCTATCCGCGTGACATGTTCCCGTTTTGCCCTCTTCTCTCTTTATTACAATTTTTGTTTTATTATATCCGTTATAAT  
 CAAATGCTCACATTTTACAGATCATTATGTGAATAATTCACATTCTTTGTCGTTTTATTACAAACATTTGTTATTGGATT  
 CCGTTATTTTCATTCTTACGTACAAACCAGCTTCTTCTTTTTTTTTACTACTATAN

>RC\_328409-528\_5-R\_Primer-D\_A02.ab1/>Col-0\_no\_BST  
 NTATAGTAGTAAAAAAAAGAAGAAGAAGCTGGTTTTGTACGTAAGAATGAAAATAACGGAATCCAATAACAATGTTTGTAAATAAAC  
 GGACAAAGAATGTGAATTATTACATAAATGATCTGTAAAATGTGAGCATTGATTATAACGGATATAATAAAACAAAAATTGTA  
 ATAAAGAGAGAAGAGGGCAAAACGGGGAACATGTCACGCGGATAGGTGTGAGAGAGTAAATGACGTAGGTTCCGTTATTTAAGAA  
 CCCTTCTAGAGAGGTCCACACACCAGAAGAG

>PK\_328409-529\_6-F\_Primer-C\_B02.ab1/>Col-0\_BST  
 NNNNNNNNNNGTAGATGANATAAATGGAATTTAATAATAATGTTTGTAAATAAATGGATAAAGAATGTGAATTATTTATATA  
 AATGATTTGTAAAATGTGAGTATTTGATTATAATGGATATAATAAAAATAAAAATTGTAATAAAGAGAGAAGAGGGTAAAA  
 TGGGGAATATGTTATGTGGATAGGTGTGAGAGAGTAAATGATGTAGGTTTTGTTATTTAAGAATTTTTTTAGAGAGGTTT  
 TTATATATTAGAAGAGAGAGAAAGAGATAGAGAGAAAATGGTGTGAGAGAAGAACAAGACNNCCTNCNNCCTTCCCTCCCC  
 CCACCTATCCACATAACCATTTTCCCCCTTTCACCCCTTCTCTCTTTATNCAAATCTTTTTTGCTCATCNCNNACNAAT  
 CAAATACCCCATTTTTACATCNNTCTTCTAAATAAATCCATTCTTTATCCATTTTCCCTCACATTAGGCTAATTCCTC  
 ACTNTTTTCTTTCCTTATACAAACNNCTTCTTCTTTTTNGGGTACNCNANACCAGCTNNTGCTNCCTTTAGTNNN

>PK\_328409-530\_6-R\_Primer-D\_C02.ab1/>Col-0\_BST  
 NNNNNNNNNNCTTCNATATATAAAAAACCTCTCTAAAAAAATTTCTTAAATAACAAAACCTACATCATTACTCTCTCACAC  
 CTATCCACATAACATATTCCCATTTTACCCTCTTCTCTCTTTATTACAATTTTTATTATATCCATTATAATCAA  
 ATACTCACATTTTACAAATCATTATATAAATAATTCACATTCTTTATCCATTTTATTACAAACATTATTTAAATTCCA  
 TTATTTTCATTCTTACATACAAACCAACTTCTTCTTTTTTTTTACTACTATAN

>PK\_328409-531\_7-F\_Primer-C\_D02.ab1/>ben1\_O\_pBEN1\_BST  
 NNNNNNNNNNNNGTNNATGANATAANGGAATTTAATAATAATGTTTGTAAATAAATGGATAAAGAATGTGAATTATTTAT  
 ATAAATGATTTGTAAAATGTGAGTATTTGATTATAATGGATATAATAAAAATAAAAATTGTAATAAAGAGAGAAGAGGGTA  
 AAATGGGGAATATGTTATGTGGATAGGTGTGAGAGAGTAAATGATGTAGGTTTTGTTATTTAAGAATTTTTTTNNAGAGG  
 TTCTTATATATTAGACNACAGAGCAAGAG

>PK\_328409-532\_7-R\_Primer-D\_E02.ab1/>ben1\_O\_pBEN1\_BST  
 NNNNNNNNNNNNCTTATATATAAAAAACCTCTCTAAAAAAATTTCTTAAATAACAAAACCTACATCATTACTCTCTC

ACACCTATCCACATAACATATTCCCCATTTTACCCTCTTCTCTCTTTATTACAATTTTTATTTTATTATATCCATTATAA  
TCAAATACTCACATTTTACAAATCATTTATATAAATAAATTCACATTCTTTATCCATTTATTACAAACATTATTATTAAT  
TCCATTATTTTCATTCTTACATACAAACCAACTTCTTCTTCTTTTTTTTACTACTATACANN

>PK\_328409-533\_8-F\_Primer-C\_F02.ab1/>ben1\_R\_pBEN1\_BST  
NNNNNTNNGNNTGTANGATGANNTAATGGAATTTAATAATAATGTTTGTAAATAAATGGATAAAGAATGTGAATTATTTAT  
ATAAATGATTTGTAAAATGTGAGTATTTGATTATAATGGATATAATAAAAATAAAAATTGTAATAAAGAGAGAAGAGGGTA  
AAATGGGGAATATGTTATGTGGATAGGTGTGAGAGAGTAAATGATGTAGGTTTTGTTATTTAAGAATTTTTTTAGAGAGG  
TTTTTATATATTAGAAGAGAGAGAAAAGAGATAGAGAGAAAATGGTGAGAGAAGAACAAGAANANANACATNTTTACTCTC  
TCACACCTATCCACATAANTATTCCCATTTTACCCTCTTCTCTCTTTATTAAATTTTTATTNNN

>PK\_328409-534\_8-R\_Primer-D\_G02.ab1/>ben1\_O\_pBEN1\_BST  
NNNNNNNNNNNCTTCNATATATAAAAACTCTCTAAAAAAATTTCTTAAATAACAAAACCTACATCATTTACTCTCTCACA  
CCTATCCACATAACATATTCCCCATTTTACCCTCTTCTCTCTTTATTACAATTTTTATTTTATTATATCCATTATAATCA  
AATACTCACATTTTACAAATCATTTATATAAATAATTCACATTCTTTATCCATTTATTACAAACATTATTATTAATTC  
ATTATTTTCATTCTTACATACAAACCAACTTCTTCTTCTTTTTTTTTACTACTATAN

>PK\_328409-535\_9-F\_Primer-C\_H02.ab1/>ben1\_T\_pBEN1\_BST  
NNNNNNNNNNGTAGATGANATAATGGAATTTAATAATAATGTTTGTAAATAAATGGATAAAGAATGTGAATTATTTATATA  
AATGATTTGTAAAATGTGAGTATTTGATTATAATGGATATAATAAAAATAAAAATTGTAATAAAGAGAGAAGAGGGTAAAA  
TGGGGAATATGTTATGTGGATAGGTGTGAGAGAGTAAATGATGTAGGTTTTGTTATTTAAGAATTTTTTTAGAGAGGTTT  
TTATATATTAGAAGAGAGAGAAAAGAGATAGAGAGAAAATGGTGAGAGAAGAACAAGAAAACCTACATCATTTACTCTCTC  
ACACCTATCCACATAACATATTCCCCATTTTACCCTCTTCTCTCTTTANNNANNTTTTTATTTTATTATATCCATTANAAT  
CAATACTCCATTTTCAAATCATTNATATAAATAATTCNNTTNNNCNNGTTCANACATNTNTNTNNNT

>PK\_328409-536\_9-R\_Primer-D\_A03.ab1/>ben1\_T\_pBEN1\_BST  
NNNNNNNNNNNNNNNTCTNNNNNTATAAAAACTCTCTAAAAAAATTTCTTAAATAACAAAACCTACATCATTTACTCTC  
TCACACCTATCCACATAACATATTCCCCATTTTACCCTCTTCTCTCTTTATTACAATTTTTATTTTATTATATCCATTAT  
AATCAAATACTCACATTTTACAAATCATTTATATAAATAAATTCACATTCTTTATCCATTTATTACAAACATTATTATTA  
ATTCCATTATTTTCATTCTTACATACAAACCAACTTCTTCTTCTTTTTTTTTACTACTATAACCANNNGNNGGCCGTGGNN  
NGAGCGTNCGGCCTTTTTGNTGTTGCGTNCGGTCTGTTTTTTGTAACAACAATNGCGCCTANGCCATCTTCNATTTTCGG  
NGNCCTTANCTTGCCACGNCCCAGAGCNCNCAGTAGCCGCCGNATCCNCCNNAANNGGGNAGTCCACCANNAGATG  
AAGCTGATCGTTTCCNCNACCCCNACGGGGGCGCNGTNCNCCAACTTTTGTTCCTGTTTNNAGAGAGCNCANNNTANNA  
TTGAGACTGNNNGGCTGGCTGGTTCCCGTNNAGATTNTAAACCGCACACTGTTCCCNATATCTCANGACCGGNAGNA  
TATGNNTNAGCCGNCGNANNNNATNNNTANNTAANTGNCTAGNTTNTGCGGTTANTNCCACTTTCNNACNNGAGTC  
CTNNNNNCNNTCNCATTTTCTAACNTCTANCAATGNAGCNGTNTTGNAAACCTAAT

## Sequence alignment:

```
ben1_O_pBEN1_BST  GGAATTTAATAATAATGTTTGTAAATAAATGGATAAAGAATGTGAATTATTTATATAAATG
ben1_T_pBEN1_BST  GGAATTTAATAATAATGTTTGTAAATAAATGGATAAAGAATGTGAATTATTTATATAAATG
Col-0_BST         GGAATTTAATAATAATGTTTGTAAATAAATGGATAAAGAATGTGAATTATTTATATAAATG
Col-0_no_BST      GGAATCCAATAACAATGTTTGTAAATAACGGACAAAGAATGTGAATTATTCACATAAATG
*****          ***** ***** * * ***** * *****
```

```
ben1_O_pBEN1_BST  ATTTGTAAAATGTGAGTATTTGATTATAATGGATATAATAAAAATAAAAATTGTAATAAAG
ben1_T_pBEN1_BST  ATTTGTAAAATGTGAGTATTTGATTATAATGGATATAATAAAAATAAAAATTGTAATAAAG
Col-0_BST         ATTTGTAAAATGTGAGTATTTGATTATAATGGATATAATAAAAATAAAAATTGTAATAAAG
Col-0_no_BST      ATCTGTAAAATGTGAGCATTGATTATAACGGATATAATAAAAACAAAATTGTAATAAAG
** ***** ***** ***** ***** *****
```

```
ben1_O_pBEN1_BST  AGAGAAGAGGGTAAAAATGGGGAATATGTTATGTGGATAGGTGTGAGAGAGTAAATGATGT
ben1_T_pBEN1_BST  AGAGAAGAGGGTAAAAATGGGGAATATGTTATGTGGATAGGTGTGAGAGAGTAAATGATGT
Col-0_BST         AGAGAAGAGGGTAAAAATGGGGAATATGTTATGTGGATAGGTGTGAGAGAGTAAATGATGT
Col-0_no_BST      AGAGAAGAGGGCAAAACGGGGAACATGTCACGCGGATAGGTGTGAGAGAGTAAATGACGT
*****          ***** ***** * * ***** *****
```

ben1\_O\_pBEN1\_BST AGGTTTTGTTATTTAAGAATTTTTTTAGAGAGGTTTTTATATAT-AGNNG-----  
ben1\_T\_pBEN1\_BST AGGTTTTGTTATTTAAGAATTTTTTTAGAGAGGTTTTTATATATTAGAAGAGAGAGAAAG  
Col-0\_BST AGGTTTTGTTATTTAAGAATTTTTTTAGAGAGGTTTTTATATATTAGAAGAGAGAGAAAG  
Col-0\_no\_BST AGGTTCCGTTATTTAAGAACCCTTCTAGAGAGGTCCC-ACACACCAGAAGAG-----  
\*\*\*\*\* \*\*\*\*\* \*\* \*\*\*\*\* \* \* \* \* \*

ben1\_O\_pBEN1\_BST -----  
ben1\_T\_pBEN1\_BST AGATAGAGAGAAAATGGTG  
Col-0\_BST AGATAGAGAGAAAATGGTG  
Col-0\_no\_BST -----

**Replicate 2**

>PK\_329142-503\_7\_pBEN1-Fv\_C04.ab1/>ben1\_O\_pBEN1\_BST  
NNNNNNNNNNNNNNNNNNATGANATAATGGAATTTAATAATAATGTTTGTAAATAAATGGATAAAGAATGTGAATTATTTAT  
ATAAATGATTTGTAAAATGTGAGTATTTGATTATAATGGATATAATAAAAATAAAAATTGTAATAAAGAGAGAAGAGGGTA  
AAATGGGGAATATGTTATGTGGATAGGTGTGAGAGACTAAATGATGTAAGTTTTGTNANTCCTNCNTTTTGTCCNCCCC  
CTCTCCCCCTCTNACCCCNCCNCNCCNCTACAGAGGNCNCCNCTACCNCNNCCCGACCNTCCCNCCCCAGTACCN  
GTCNNATCCCCTNGACAANNCCCCTCCCCNACGCCCTCCGGACCNNCCCTCCNNNNNCTCNCCTCANNANANCCATGCT  
NCNCTCTNNNTGTCNCCNCCCCNCCGAGCCACCCTCCTCCACCNCGCCCCCCCGCCCCCCCCCTCTGCCNCTTT  
CCCATCGCANNANTGCCTGATGCCACATCCNTCTNNGCCACCCTCCAACCTCGCCGCGTCTGCTCAACCNCNCTCNC  
CNCACCCCTCTCTCNGCCNCCCTCCACCCCNCTCCCTNNCCAANN

>PK\_329142-504\_8\_pBEN1-Fv\_D04.ab1/>ben1\_R\_pBEN1\_BST  
NNNNNNNNNNNNNGTAGATGANATAATGGAATTTAATAATAATGTTTGTAAATAAATGGATAAAGAATGTGAATTATTTATA  
TAAATGATTTGTAAAATGTGAGTATTTGATTATAATGGATATAATAAAAATAAAAATTGTAATAAAGAGAGAAGAGGGTAA  
AATGGGGAATATGTTATGTGGATAGGTGTGAGAGAGTAAATGATGTAGGTTTTGTTATTTAAGAATTTTTTTAGAGAGGT  
TTTTATATATTAGAAGAGAGAGAAAGAGATAGAGAGAAAATGGTGAGAGAAGAACAAGANNCCCCCTNANNCCCGTCGG  
GTCTCCTTANCNATAACCACCTCNCGATGCCCNCGCGCCNTGANCNNGTCNNCTCTCNGAGNGGCNTGCNCCNCCN  
GCCCCNNTTGNNGCCNNNACTCCGAGCNNNNNCGCCNCCCCCGCCCCCNCCCCCACCCTCTGCCTCGNATCTGAC  
TCCTGANTGCCGGTGCCAACCTCCNCGAATGACNCCCTCCGACNCGGCGCGTCTGCTCGCCNCCACTCNCNCCCC  
CCGACACCNCNCTGGGNTCCGNCNCCCCCTGCCNCCN

>PK\_329142-517\_7\_pBEN1-Rv\_C06.ab1/>ben1\_O\_pBEN1\_BST  
NNNNNNNNNNNNNNNNNNNAAAACCTCTCTAAAAAATTCTTAAATAACAAAACCTACATCATTTACTCTCTCACACC  
TATCCACATAACATATCCCATTTTACCCTCTTCTCTTTTATTACAATTTTTATTTATATATCCATTATAATCAA  
TACTCACATTTTACAAATCATTTATATAAATAGGTACATTTCTTTATCCATTTATTACAAACATTATTTAAATTCAT  
TATTTTCATTTTACATACAAACCAACTTCTTCTTTTTTTTACTACTATACAGGNGCNGNNGGTGGTCNTGTAGGN  
CGGGGTGGCTGNCTGNNGCNGNTNGNNNGGTGCGTACATTTACTAGGNCCTANNNNGCGAGNCGCTGGCNGCGTAG  
TCCTGNAGCGGCGGCGCCGNGACCCTGGTGGGCGCGNCCCTCGAGGGGGNTGTANANGGCCNANGATGANNGNN  
CGGNCGNGCNGCNGGATCAGGNTAACNNGCCNNTGATCANGNNGGGATGNCNNGGCCATCGCGNTN

>PK\_329142-518\_8\_pBEN1-Rv\_D06.ab1/>ben1\_R\_pBEN1\_BST  
NNGNGNNGNNNNNNNNANGNNNNNNNNNTGCTNNAAAAAGGCTTAAATAACAAAACCTACATNATTTGNTCTCTNNNN  
CCTATCCACATAACATATCCCATTTTACCCTCTTCTCTTTTATTACAATTTTTATTTATATATCCATTATAATCA  
AATGCTCACATTTTACAGATCATTTATATAGATAGTTNACATTTCTTTATCCATTTATTACAAACATTATTTAAATTC  
ATTATTTTCATTTTACATACAAACCAACTTCTTCTTTTTTTTACTACTATACN

## Bisulfite pNOS raw sequences

GTTTACCCGCCAATATATCTGTCAAACTGATAGTTTAAACTGAAGGCGGGAAACGACAATCTGATCATGAGCGGAGAATTAAGGGAGTCACGT  
 TATGACCCCGCCGATGACGCGGGACAAGCCGTTTTACGTTTGAAGTACAGAACCGCAACGTTGAAGGAGCCACTCAGCCGCGGGTTTCTGGA  
 GTTTAATGAGCTAAGCACATACGTGAGAAACCATTATTGCGCGTTCAAAGTCGCCTAAGTCACTATCAGCTAGCAAATATTTCTGTCAAAAATG  
 CTCCACTGACGTTCCATAAATCCCTCGGTATCCAATTAGAGTCTCATATCACTCTCAATCCAAATAATCTGCACCGGATCTGGATCGTTTCGATG  
 ATTGAACAAGATGGATTGCACGCAGGTTCTCCGGCCGCTTGGGTGGAGAGGCTATTCCGGCTATGACTGGGCACAACAGACAATCGGCTGCTCTGA  
 TGCCGCCGTGTTCCGGCTGTGACGCGAGGGGCGCCCGGTTCTTTTGTCAAGACCGACCTGTCCGGTGCCCTGAATGAACTGCAGGACGAGGCAG  
 CGCGGCTATCGTGGCTGGCCACGACGGGCGTTCCTTGCGCAGCTGTGCTCGACGTTGTCACTGAAGCGGGAAGGGACTGGCTGCTATTGGGCGAA  
 GTGCCGGGGCAGGATCTCTGTCATCTCACCTGCTCCTGCCGAGAAAGTATCCATCATGGCTGATGCAATGCGGCGGCTGCATACGCTTGATCCG  
 GCTACCTGCCATTGACCACCAAGCGAAACATCGCATCGAGCGAGCACGTACTCGGATGGAAGCCGGTCTTGTGATCAGGATGATCTGGACGA  
 AGAGCATCAGGGGCTCGCGCCAGCCGAAGTTCGCCAGGCTCAAGGCGCGCATGCCCGACGGCGATGATCTCGTCGTGACCCATGGCGATGCTT  
 GCTTGCCGAATATCATGGTGGAAAATGGCCGTTTTCTGGATTTCGACTGTGGCCGGCTGGGTGTGGCGGACCGCTATCAGGACATAGCGTTG  
 GCTACCCGTGATATTGCTGAAGAGCTTGCGGCGAATGGGCTGACCGCTTCTCGTGCTTTACGGTATCGCCGCTCCCGATTGCGAGCGCATCGCCT  
 TCTATCGCCTTCTTGACGAGTTCTTCTGA

**Primers:**

pNOS-BS-F (Primer A/<sub>pROK2-Fv</sub>): 5'-GGGTTTTYTGGAGTTTAATGAGYTAAG-3'

pNOS-BS-R (Primer B/<sub>pROK2-Rv</sub>): 5'-CACTTCRCCCAATARCARTCCCTTCC-3'

**Replicate 1**

>PK\_328409-501\_1-F\_Primer-A\_A01.ab1/>*ben1\_o\_pNOS\_no\_BST*

CNNNNNNNNNNNANATTATTGCGGTTCCNNNGTCGCCTAAGGTCACTATCAGCTAGCAAATATTTCTGTCAAAAATGCT  
 CCACTGACGTTCCATAAATCCCTCGGTATCCAATTAGAGTCTCATATCACTCTCAATCCAAATAATCTGCACCGGAT  
 CTGGATCGTTTCGCATGATTGAACAAGATGGATTGCACGCAGGTTCTCCGGCCGCTTGGGTGGAGAGGCTATTCCGGCTAT  
 GACTGGGCACAACAGACAATCGGCTGCTCTGATGCCGCCGTGTTCCGGCTGTGACGCGAGGGGCGCCCGGTTCTTTTGT  
 CAAGACCGACCTGTCCGGTGCCCTGAATGAACTGCAGGACGAGGCAGCGCGGCTATCGTGGCTGGCCACGACGGGCGTTC  
 CTTGCGCAGCTGTGCTCGACGTTGCTCACTGAAGCGGGAAGGGACTGGCTGCTATTGGGCGAAGTGAACNCNTCAAGCACA  
 GCTGCGCAGGNNNNNCGTCNTGGCCAGCCNNATAGCCCCGCTNCTTCTCCTGNNNTTNTTAAGGNNCCGGNANNGGNN  
 NCTTGANAAAAAAGAACCGGGGCCCCNNGNNNNAAANCCGAAACCGGGCGCNNNNAACCCNNNNNNNTTGTNNNNGCC  
 NNANAAANCNNAAANGCCTCCCCCNCNGGNNNNNANCNTGNTNNNTNNNTTNTTTCGNNNNNNNNNCNNATNNNAN  
 NNNNTN

>PK\_328409-502\_1-R\_Primer-B\_B01.ab1

NNNNNNNNNNNNNNNNGTCGAGCACAGCTGCGCAGGAACGCCGTCGTGGCCAGCCACGATAGCCGCGCTGCCTCGTCC  
 TGCACTTCAATCAGGGCACCGGACAGGTGCGTCTTGACAAAAAGAACCAGGGCGCCCTGCGCTGACAGCCGGAACACGGC  
 GGCATCAGAGCAGCCGATTGTCTGTTGTGCCAGTCATAGCCGAATAGCCTCTCCACCCAAGCGCCGGAGAACCTGCGT  
 GCAATCCATCTTGTCAATCATGCGAAACGATCCAGATCCGGTGCAGATTATTTGGATTGAGAGTGAATATGAGACTCTA  
 ATTGGATACCGAGGGGAATTTATGGAACGTCAGTGGAGCATTGTTGACAAGAAATATTTGCTAGCTGATAGTGACCTTAG  
 GCGACTTTTGAACGCGCAATAATGGTTTCTGACGTATGTGCTTAACTCATAAACTCCAAAAACNNNN

>RC\_328409-502\_1-R\_Primer-B\_B01.ab1/>*ben1\_o\_pNOS\_no-BST*

NNNNGTTTTTGGAGTTTAATGAGTTAAGCACATACGTGAGAAACCATTATTGCGGTTCAAAGTCGCCTAAGGTCACTATCAGCTA  
 GCAAATATTTCTGTCAAAAATGCTCCACTGACGTTCCATAAATCCCTCGGTATCCAATTAGAGTCTCATATCACTCTCAATCCAA

TAATCTGCACCGGATCTGGATCGTTTCGCATGATTGAACAAGATGGATTGCACGCAGGTTCTCCGGCCGCTTGGGTGGAGAGGCTAT  
TCGGCTATGACTGGGCACAACAGACAATCGGCTGCTCTGATGCCGCCGTGTTCCGGCTGTCAGCGCAGGGGCGCCCGTTCTTTTTG  
TCAAGACCGACCTGTCCGGTGCCCTGAATGAAGTGCAGGACGAGGCAGCGCGCTATCGTGGCTGGCCACGACGGGCGTTCTCTGCG  
CAGCTGTGCTCGACNNNNNNNNNNNNNNNNNN

>PK\_328409-503\_2-F\_Primer-A\_C01.ab1/>*ben1\_o\_pNOS\_BST*

CNNNNNNNNANANNTTATTGCNTGTTCCNNNTTGCCTAAGNTCACTATCANCTAGCAAATATTTCTGTCAAAAATGCTCC  
ACTGATGTTCCATAAATCCCTTGGTATCCAATTAGAGTCTCATATCACTCTCAATCCAAATAATCTGCACTGGATCT  
GGATTGTTTTGCATGATTGAACAAGATGGATTGCATGCAGGTTCTTTGGTTGTTTGGGTGGAGAGGTTATTTGGTTATGA  
NTGGGCACAACANATAATTGGCTGCTCTGATGTCGTTGTGTTTNGGTTGTCANNGCANGGNTGCTTGGTTCTTTTTGTCA  
AGATTGACCTGTCTGGNGCCTGAATGAAGTGCAGGATGAGGCANNGTGGCTATTGTGGCTGGNCATGATGGGTGTTCTT  
TGCGCANCTGTGCTNGATGTTGCTACTGAANTGNGAAGGGACTGGCTGCTATTGGGCGAAGTGA

>PK\_328409-504\_2-R\_Primer-B\_D01.ab1

CNNNNNNNNNNNNNNNTCNANCNCNNCTACNCAAAANACACCCATCATANCCAACCACAATAACCACACTACCTCATCCT  
ACAATTCATTCAAAACACCAAAACAAATCAATCTTAACAAAAAACCACACCCCTACACTAACAAACCAAAACACAACA  
ACATCAAAACAACCAATTATCTATTATGCCAATCATAACCAATAACCTCTCCACCCAAACAACCCAAAAAANTGCGNT  
GCAANCCATCTTTGNNCNCATCATGCAAAAAAACCACAAANCCNGGGGAAATNTTTGGATNGNAGNGGNANATGANNNNC  
TAATTGGATACCAAGGGGAATTTNTGGNANNTCANGGGNNNTTTTTGANNAGAAATATTTGNTAGCNGNNNNGGGNCTT  
ANGGNANTTTTGNANACNCAAAANNNNTTCNGANNATGGGGNNNACTCNNTAAACNCCAAAAAACCAN

>RC\_328409-504\_2-R\_Primer-B\_D01.ab1/>*ben1\_o\_pNOS-BST*

NTGGGTTTTTTGGNGTTTANNGAGTNNCCCATNNNTCNGAANNNTTTTTGNGTNTNCAAAANTNCCNTAAGNCCNNNNCN  
GCTANCAAATATTTCTNNTCAAAANNNNCCNTGANNTNCCANAAATCCCTTGGTATCCAATTAGNNNTCATNTNCCNCTNN  
CNATCCAAANAATTTCCCNCGNTTTGGGTTTTTTGCATGATNGNCAAGATGGNTTGCANCGCANTTTTTTGGGTTGTTGGGT  
GGAGAGGTTATTTGGTTATGATTGGGCATAATAGATAATTGGTTGTTTGGATGTTGTTGTTTGGTTGTTAGTGTAGGGGTGTTT  
GTTTTTTTTGTTAAGATTGATTTGTTTGGTGTGTTTGAATGAATTGTAGGATGAGGTAGTGTGGTTATTGTGGTTGGNTATGATGGGTG  
TNTTTTGNGTAGNNGNGNTNGANNNNNNNNNNNNNNNG

>PK\_328409-505\_3-F\_Primer-A\_E01.ab1/>*ben1\_R\_pNOS\_BST*

NNNNNNNNNNATTNTTATTNCGCGTTCAAAGTCGTCTAAGGTTACTATCAGTTAGNAAATATTTTTGTCAAAAATGTTT  
TACTGACGTTCCATAAATTTTCTCGGTATTCAATTAGAGTCTCATATTTATTCTCAATTCAAATAATCTGTACCGGATC  
TGGATCGTTTCGTATGATTGAACAAGATGGATTGTACGCANGTTTTCCGGTCGTTTGGGTGGAGAGGCTATTCGGCTATG  
ACTGGGTACAACAGACAATCGGCTGTTCTGATGCCGCCGTGTTCCGGCTGTCAGTGCANGGGTGTCCGGTTTTTTTTGT  
AAGACCNATCTGTCCGGTGTCTGAATGAAGTGCANGACGAGGTANCGCGCTATCGTGGCTGGTTACGANGGGNGTTTT  
TTGCNTANCTGTGTTGATGTTGTTACTGAAGCGGGAANGGACTGGCTGCTATTGGGCGAAGTGAN

>PK\_328409-506\_3-R\_Primer-B\_F01.ab1

NNNNNNNNNNNNNNCGANNACGCTANCGCAANAACAGCCNGTCNGNACACCACGATAGCGCGCTANCNCGTCTNGNAG  
TTCATTACAGACACCGGACAGATCGGTCTTGACAANANNACCGGACACCCCTGCACTGACAGCCGNAACACGGCGGCATCA  
GAACAGCCGATTGTCTGTTGTACCCAGTCATAGCNNNATANCTCTCCACCCAANNNNNNNGAAAACCTGCGTACAATCC  
ATCTTGTTCATCATACGAAACGATCCAGATCCGGTACAGATTATTTGAATTGAGANTGAATATGAGACTCTAATTGAAT  
ACCGAGAAAAATTTATGNAACGTCANTNNACCATTTTTGACAAAAAATATTTGCTANCTGATAGTAACCTTAGACGACTT  
TTGAACGCGCAATAATANTTTCTGACGTATGTACTTNTCATTAAACTCCAAAAANNNNNNNN

>RC\_328409-506\_3-R\_Primer-B\_F01.ab1/>*ben1\_R\_pNOS-BST*

NNNNNNNTTTTGGAGTTAATGANNAAGTACATACGTCAGAAANTATTATTGCGCGTTCAAAAGTCGTCTAAGGTTACTATCAGN  
 TAGCAAATATTTTTGTCAAAAATGGTNNANTGACGTTNCATAAATTTTTCTCGGTATTCAATTAGAGTCTCATATTCANTCTCAATTC  
 AAATAATCTGTACCGGATCTGGATCGTTTCGTATGATTGAACAAGATGGATTGTACGCAGGTTTTCCNNNNNTTGGGTGGAGAGG  
 NTATNNGCTATGACTGGGTACAACAGACAATCGGCTGTTCTGATGCCGCCGTGTTNCGGCTGTCAGTGCAGGGGTGTCCGGTNTT  
 NTTGTCAAGACCGATCTGTCCGGTGTCTGAATGAACTNCNAGGACGNGNTAGCGCGCTATCGTGGTGTNCNGACNGGCTGTTNTTG  
 CGNTAGCTGNNTCGNNNNNNNNNNNNNNNNNN

>PK\_328409-507\_4-F\_Primer-A\_G01.ab1/>Triple\_pNOS-BST

NNNNNNNNNNNNNNNTTATTGCGCGTTCAAAAGTCGTCTAAGGTTACTATCAGCTAGCAAATATTTTTGTCAAAAATGCT  
 CCACTGACGTTCCATAAATTTTTCTCGGTATTCAATTAGAGTCTCATATTCATTCTCAATTCAAATAATCTGTACCGGAT  
 CTGGATCGTTTCGTATGATTGAACAAGATGGATTGTACGCAGGTTCTCCGCCGCTTGGGTGGAGAGGCTATTCCGGCTAT  
 GACTGGGTACAACAGACAATCGGCTGTTCTGATGCCGCCGTGTTCCGGCTGTCAGCGCAGGGGGCTCCGGTTTTTTTTGT  
 CAAGACCGATCTGTCCGGTGTCTGAATGAACTGCAGGACGAGGCAGCGCGGCTATCGTGGCTGGTTACGACGGGCGTTT  
 CTTGCGCAGCTGTGTTTCGACGTTGTTACTGAAGCGGGAAGGGACTGGCTGCTATTGGGCGAAGTGA

>PK\_328409-508\_4-R\_Primer-B\_H01.ab1

NNNNNNNNNNNNNNNNNNNTCNANACAGCTGCGCANAAACGCCGTCGTANCCAGNCCACGATAGCNCGCGCTGCCTCG  
 TCCTGCAGTTCATTAGAACCACCGACAGATCGGTCTTGACAAAANNNNNCGGACGCCCTGCGCTGACAGCCGGAACAC  
 GGCGGCATCAGAACAGCCGATTGTCTGTTGTACCCAGTCATAGCCGAATAGCCTCTCCACCAAGCGNNNGGANAACCTG  
 CGTNNNATCCATCTTGTCAATCATNCGAAACGATCCAGATCCGGTACAGATTATTTGAATTGAGANTGAATATGAGACT  
 CTAATTGAATACCGAGANAATTTATGGAACGTCAGTGNAGCATTTTTGACAAAAAATATTTGCTAGCTGATAGTANCT  
 TAGACGACTTTTGAAACGCGCAATANTNNTTTCTGACGTATGTNCTTAACTCATTAAACTCCANAAACCCN

>RC\_328409-508\_4-R\_Primer-B\_H01.ab1/>Triple\_pNOS-BST

NGGGTTNTGGAGTTAATGAGTTAAGNACATACGTCAGAAANNANTATTGCGCGTTCAAAAGTCGTCTAAGGNTACTATCAGCTA  
 GCAAATATTTTTGTCAAAAATGCTNCACTGACGTTCCATAAATTTNTCTCGGTATTCAATTAGAGTCTCATATTCANTCTCAATTCAA  
 TAATCTGTACCGGATCTGGATCGTTTCGNATGATTGAACAAGATGGATNNNACGCAGGTTNTCCNNCGCTTGGGTGGAGAGGCTA  
 TTCGGCTATGACTGGGTACAACAGACAATCGGCTGTTCTGATGCCGCCGTGTTCCGGCTGTCAGCGCAGGGGGCTCCGNNNNNTTT  
 GTCAAGACCGATCTGTCCGGTGTCTGAATGAACTGCAGGACGAGGCAGCGCGNGCTATCGTGGNCTGGNTACGACGGGCGTNTG  
 CGCAGCTGTGNTNGANNNNNNNNNNNNNNNNNNNNNNNN

**Sequence alignment:**

ben1\_O\_pNOS\_no-BST AAATATTTCTTGTCAAAAATGCTCCACTGACGTTCCATAAATTCCTCGGTATCCAATT  
 ben1\_R\_pNOS\_BST AAATATTTTTGTCAAAAATGTTTTACTGACGTTCCATAAATTTTTCTCGGTATTCAATT  
 ben1\_O\_pNOS\_BST AAATATTTCTTGTCAAAAATGCTCCACTGATGTTCCATAAATTCCTCGGTATCCAATT  
 \*\*\*\*\* \*\*\*\*\* \* \*\*\*\*\* \*\*\*\*\* \*\* \*\*\*\*\* \*\*\*\*\*

ben1\_O\_pNOS\_no-BST AGAGTCTCATATTCACTCTCAATCAAATAATCTGCACCGGATCTGGATCGTTTCGATG  
 ben1\_R\_pNOS\_BST AGAGTCTCATATTTATCTCAATCAAATAATCTGTACCGGATCTGGATCGTTTCGTATG  
 ben1\_O\_pNOS\_BST AGAGTCTCATATTCACTCTCAATCAAATAATCTGCACCTGGATCTGGATTGTTTTGCATG  
 \*\*\*\*\* \* \*\*\*\*\* \*\*\*\*\* \*\* \*\*\*\*\* \*\*\*\*\* \* \* \*

ben1\_O\_pNOS\_no-BST ATTGAACAAGATGGATTGCACGCAGGTTCTCCGGCCGCTTGGGTGGAGAGGCTATTCCGGC  
 ben1\_R\_pNOS\_BST ATTGAACAAGATGGATTGTACGCANGTTTTCCGGTCGTTTGGGTGGAGAGGCTATTCCGGC  
 ben1\_O\_pNOS\_BST ATTGAACAAGATGGATTGCATGCAGGTTCTTTGGTTGTTTGGGTGGAGAGGTTATTTGGT  
 \*\*\*\*\* \* \* \* \* \* \* \* \* \* \* \* \* \* \* \* \* \* \* \* \* \* \* \* \*



```
ben1_O_pNOS_no-BST   TATGACTGGGACAACAGACAATCGGCTGCTCTGATGCCGCCGTGTTTC
ben1_R_pNOS_BST      TATGACTGGGTACAACAGACAATCGGCTGTTCTGATGCCGCCGTGTTTC
ben1_O_pNOS_BST      TATGANTGGGCACAACANATAAATTGGCTGCTCTGATGTCGTTGTGTTT
*****  ***  ***** *  **  *****  *****  **  *****
```

## Replicate 2

```
>PK_329142-501_2_pROK2-Fv_A04.ab1/>ben1_O_pNOS-BST
CCNNNNNNANANNTTATTGCGTGTTCCNNNTGCGCTAAGGTCACATCAGCTAGCAAATATTTCTTGTCAAAAATGCTCCA
CTGATGTTCCATAAATTTCCCTTGGTATCCAATTAGAGTCTCATATTTCACTCTCAATCCAAATAATCTGCACTGGATCTG
GATTGTTTTGCATGATTGAACAAGATGGATTGCATGCAGGTTCTTTGGTTGTTTGGGTGGAGAGGTTATTTGGTTATGAT
TGGGTATAATAGATAAATGGTTGCTCTGATGTTGTTGTGTTTTGGTTGTCAGTGCAGGGGTGTTTGGTTCTTTTTGTCAA
GATTGATCTGTCTGGTGTCTGAATGAACTGCAGGATGAGGCAGTGTGGCTATTGTGGCTGGTCATGATGGGTGTTCCTT
GCGCAGCTGTGCTTGATGTTGTCAGTGAAGCGGAAGGGACTGGCTGCTATTGGGGCGAANNTGANCTCCNCNAGACTGN
CCNANNNNNNCNNCTCCCNCTTTTNCCTTGTGANNNNNANCCANCNTNNCNNNNNNNNCTNNNCTTCACTCNCNCCNNCT
CNNCTTTGGTCTTCCCTCNCNNCTGCTCTCTCCCTCCCN
```

```
>PK_329142-502_3_pROK2-Fv_B04.ab1/>ben1_R_pNOS-BST
NNNNNNNNNNNNNTTATTGCGCGTTCAAAGTCGTCTAAGGTTACTATCAGTTANCAAATATTTTTTGTCAAAAAATGTTNT
ACTGACGTCCATAAATTTTTCTCGGTATTTCAATTAGAGTCTCATATTTATTCTCAATTCAAATAATCTGTACCGGATCT
GGATCGTTTCGTATGATTGAACAAGATGGATTGTACGCAGGTTTTCCGGTCGTTTGGGTGGAGAGGCTATTCGGCTATGA
CTGGGTACAACAGACAATCGGCTGTTCTGATGCCGCCGTGTTCCGGCTGTCAGTGCAGGGGTGTTCCGGTTTTTTTTGTCA
NNANCGATCTGTCCGGTGTCTGAATGAACTGCAGGACGAGGCANCGCGGCTATCGTGGCTGGTTACGATGGGTGTTTTT
TGCGTANCTGTGTTTCGATGTTGTTACTGAANCGGGAAGGGACTGGCTGCTATTGGGGCGAANTGANACNNCCAGNGNCCA
CACNCCTTNNTGCCNNCNCNNCTTNNCANNATGACACCCAACANCNNCNCNNCGNNTANNNATCNCNCNNCTNNNCTC
CCGNNACTCNTGCATAGNNGTCNNNNNNNTCCTGACTGCN
```

```
>PK_329142-515_2_pROK2-Rv_A06.ab1/>ben1_O_pNOS-BST
NNNNNNNNNNANNNNNNNNNNNNNNNNNCTACNCAAAGACACCCATCATAACCNACCACAATAACCACACTACCTCATCCTA
CAATTCATTCAAAACACCAAACAATCAATCTTAACAAAAAAAACCAAACACCCCTACGCTAACAAACCAAAAACACAACA
CATCAAAAACAACCAATTATCTATTATACCCAATCGTAACCAAATAAACCCTCCACCAAAACAACCAANANAANNNNGGN
NNNNNNNNTNNANATAGNAAAAAGNNTNNAANCNGGGNNTANTATTTGGANNAGAGNGGNATGAGANNNTNNNTGGNNT
CCAGGGGAAATTTTGGGACNTTACGGGGAGCTTTTTGGACAGAAATATTTGGTAACCTGGNNANGGNCCTAAGGCAATTTT
GGACACNNAATAAAGTTTTNCGNNGNANGGGGCTNACCCTTAAACCNANAAACCAANNAGGNTGCGGGAGNNGNNGN
GCACCAGNNGCTCGNTGAGAAAANGCNNGGAGACTGGTACGATGTGCGNAGNATCCGNNCCTGATCNTGCTGNGGGCTGN
NNTGCACTGTGTGNAGCNNNACGGCGACTAAATACTTGGTTTTGNNTTGGANGTGCCGACGTCATGCTGGGGTGAANGTG
CCTGTG
```

```
>PK_329142-516_3_pROK2-Rv_B06.ab1/>ben1_R_pNOS-BST
NNNNNNNNNNNNANNNNCNNNNNCNGCNNNNNNNNNNCCNNNNCNNNAANNNNCNNNATAAGCCNGCGNTAGCNCNGN
CCTGNANNNNTTCNNANCACCGGACNNATCGGCCTNGANNNNNNNNACCGGANCCCTGCNCTGACAACCGGAACACGG
NGGCATCANANCAGNNGATNGTCTGTTGTACCNANNGNTAGCCNATTAACCTTCTCCCCCAANCGNCCCGGAAACCT
GCGTACAATCCATCTTGTTCATCATAACGAAACGATCCAGATCCGGTACAGATTATTTGAATTGAGAGTGAATATNANAC
TCTAATTGAATACCGANAAAANNTNATGGAACGTCNNGNNAANATTTTTGNNAAAAAAATATTTGCTANCTGATAGTAAC
CTTAGACGACTTTTGAACGCGCAATANTAATTTCCGGACGTATGTAACCTAATTAACCTCNAAAAANNAAN
```

*NPTII* gene sequencing V2

GTTTACCCGCCAATATATCCTGTCAAACACTGATAGTTTAAACTGAAGGCGGGAAACGACAATCTGATCATGAGCGGAGAATTAAGGGAGTCACGT  
TATGACCCCGCCGATGACGCGGGACAAGCCGTTTTACGTTTGAAGTACGAGAACCAGCAACGTTGAAGGAGCCACTCAGCCG/CGGGTTTCTGGA  
GTTAATGAGCTAAGCACATACGTCAGAAACCATTATTGCGCGTTCAAAGTGCCTAAGTCACTATCAGCTAGCAAATATTTCTGTCAAAAATG  
CTCCACTGACGTTCCATAAATCCCTCGGTATCCAATTAGAGTCTCATATCACTCTCAATCCAAATAATCTGCACCGGATCTGGATCGTTTCGCATG  
ATTGAACAAGATGGATTGCACGCAGGTTCTCCGGCCGCTTGGGTGGAGAGGCTATTCGGCTATGACTGGGCACAACAGACAATCGGCTGCTCTGA  
TGCCGCCGTGTTCCGGCTGTGACGCGAGGGGCGCCCGTTCTTTTGTCAAGACCGACCTGTCGGGTGCCCTGAATGAACTGCAGGACGAGGCAG  
CGCGGCTATCGTGGCTGGCCACGACGGGCGTTCTTGCAGCTGTGCTCGACGTTGCTACTGAAGCGGGAAGGGACTGGCTGCTATTGGGCGAA  
GTGCCGGGGCAGGATCTCTGTCATCTCACCTGCTCCTGCCGAGAAAGTATCCATCATGGCTGATGCAATGCGGCGGCTGCATACGCTTGATCCG  
GCTACCTGCCATTGACCACCAAGCGAAACATCGCATCGAGCGAGCACGTACTCGGATGGAAGCCGGTCTTGTGATCAGGATGATCTGGACGA  
AGAGCATCAGGGGCTCGCGCCAGCCGAAGTTCGCCAGGCTCAAGGCGCGCATGCCCGACGGCGATGATCTCGTCGTGACCCATGGCGATGCCT  
GCTTGCCGAATATCATGGTGGAAAATGGCCGCTTTTCTGGATTTCATCGACTGTGGCCGGCTGGGTGTGGCGGACCGCTATCAGGACATAGCGTTG  
GCTACCCGTGATATTGCTGAAGAGCTTGGCGGCGAATGGGCTGACCGCTTCTCGTGCTTTACGGTATCGCCGCTCCCGATTGCGAGCGCATCGCCT  
TCTATCGCCTTCTTGACGAGTTCTTCTGAGCGGGACTCTGGGTTGCAAATGACCGACCAAGCGACGCCAACCTGCCATCACGAGATTTCGATTC  
ACCGCCGCTTCTATGAAAGGTTGGGCTTCGGAATCGTTTTCCGGGACGCGGCTGGATGATCCTCCAGCGCGGGGATCTCATGCTGGAGTTCTT  
GCCACGGGATCTCTGCGGAACA

>ben1\_O\_NPTII-F1

NNNNNNNACNTNNGAGCCACTCAGCCGCGGGTTTCTGGAGTTAATGAGCTAAGCACATACGTCAGAAACCATTATTG  
CGCGTTCAAAGTGCCTAAGGTCACTATCAGCTAGCAAATATTTCTTGTCAAAAATGCTCCACTGACGTTCCATAAAT  
CCCCTCGGTATCCAATTAGAGTCTCATATCACTCTCAATCCAAATAATCTGCACCGGATCTGGATCGTTTCGCATGATT  
GAACAAGATGGATTGCACGCAGGTTCTCCGGCCGCTTGGGTGGAGAGGCTATTCGGCTATGACTGGGCACAACAGACAAT  
CGGCTGCTCTGATGCCGCCGTGTTCCGGCTGTGACGCGAGGGGCGCCCGTTCTTTTGTCAAGACCGACCTGTCCGGTG  
CCCTGAATGAACTGCAGGACGAGGCAGCGGGCTATCGTGGCTGGCCACGACGGGCGTTCCCTTGCAGCTGTGCTCGAC  
GTTGTCACTGAAGCGGGAAGGGACTGGCTGCTATTGGGCGAAGTGCAGGGGCGAGGATCTCCTGTATCTCACCTTGCTCC  
TGCCGAGAAAGTATCCATCATGGCTGATGCAATGCGGCGGCTGCATACGCTTGATCCGGCTACCTGCCATTGACCACC  
AAGCGAAACATCGCATCGAGCGAGCACGTACTCGGATGGAAGCCGGTCTTGTGATCAGGATGATCTGGACGAAGAGCAT  
CAGGGGCTCGCGCCAGCCGAAGTTCGCCAGGCTCAAGGCGCGCATGCCCGACGGCGATGATCTCGTCGTGACCCATGG  
CGATGCCTGCTTGCCGAATATCATGGTGGAAAATGGCCGCTTTTCTGGATTTCATCGACTGTGGCCGGCTGGGTGTGGCGG  
ACCGCTATCNNNCATAGCGTTGGCTACCCGTGATATTGCTGAAGAGCTTGGCGGCGAATGGGCTGACCGCTTCTCGTGC  
TTTACGGTATCGCCGCTCCCGATTGCGAGCGCATCNCCTTCTATCGCCTNCTTGACNAGTTCTTCTGANCGNNNNNNN  
NNGGGGNNNNNNNNNNNNNNNNNNNNNNAAAAAGNAN

>ben1\_R\_NPTII-F1

NNNNNNNACNTNNGANGANCCNCTCAGCCGCGGGTTTCTGGAGTTAATGAGCTAAGCACATACGTCAGAAACCATTATTG  
CGCGTTCAAAGTGCCTAAGGTCACTATCAGCTAGCAAATATTTCTTGTCAAAAATGCTCCACTGACGTTCCATAAAT  
CCCCTCGGTATCCAATTAGAGTCTCATATCACTCTCAATCCAAATAATCTGCACCGGATCTGGATCGTTTCGCATGATT  
GAACAAGATGGATTGCACGCAGGTTCTCCGGCCGCTTGGGTGGAGAGGCTATTCGGCTATGACTGGGCACAACAGACAAT  
CGGCTGCTCTGATGCCGCCGTGTTCCGGCTGTGACGCGAGGGGCGCCCGTTCTTTTGTCAAGACCGACCTGTCCGGTG  
CCCTGAATGAACTGCAGGACGAGGCAGCGGGCTATCGTGGCTGGCCACGACGGGCGTTCCCTTGCAGCTGTGCTCGAC  
GTTGTCACTGAAGCGGGAAGGGACTGGCTGCTATTGGGCGAAGTGCAGGGGCGAGGATCTCCTGTATCTCACCTTGCTCC  
TGCCGAGAAAGTATCCATCATGGCTGATGCAATGCGGCGGCTGCATACGCTTGATCCGGCTACCTGCCATTGACCACC  
AAGCGAAACATCGCATCGAGCGAGCACGTACTCGGATGGAAGCCGGTCTTGTGATCAGGATGATCTGGACGAAGAGCAT  
CAGGGGCTCGCGCCAGCCGAAGTTCGCCAGGCTCAAGGCGCGCATGCCCGACGGCGATGATCTCGTCGTGACCCATGG  
CGATGCCTGCTTGCCGAATATCATGGTGGAAAATGGCCGCTTTTCTGGATTTCATCGACTGTGGCCGGCTGGGTGTGGCGG  
ACCGCTATCNACATAGCGTTGGCTACCCGTGATATTGCTGAAGAGCTTGGCGGCGAATGGGCTGACCGCTTCTCGTGC  
TTTACGGTATCGCCGCTCCCGATTGCGAGCGCATCGCCTTCTATCGCCTTCTTGACGANTTCTTCTGANCGNNGNNNNNN  
NNNNNNGGNNNGNNNNNNNNNAA

>ben1\_O\_NPTII-F2

NNNNNNNNNGGGCGGNNNGCNNNNNNNCNNNNNTCCGGCTNACCTNNCCATTTCGACCACCAAGCGAAACATCGCATCGAG  
CGAGCACGTACTCGGATGGAAGCCGGTCTTGTGATCAGGATGATCTGGACGAAGAGCATCAGGGGCTCGCGCCAGCCGA  
ACTGTTCCGAGGCTCAAGGCGCGCATGCCGACGGCGATGATCTCGTGTGACCCATGGCGATGCCTGCTTGCCGAATA  
TCATGGTGAAAATGGCCGCTTTTCTGGATTTCATCGACTGTGGCCGGCTGGGTGTGGCGGACCGCTATCAGGACATAGCG  
TTGGCTACCCGTGATATTGCTGAAGAGCTTGGCGGCAATGGGCTGACCGCTTCTCTGCTGTTTACGGTATCGCCGCTCC  
CGATTTCGAGCGCATCGCCTTCTATCGCCTTCTTGACGAGTTCTTCTGAGCGGGACTCTGGGGNNGAAAATGAAAGAACCC  
CCTCCNNACCTTCCCCCGGATGGGGGNCGAGGGAGCTGATCGCCANGNGGNNCCANCNNNNNANNACAANCCNCCGGCTT  
GTGCTNNTTTTNNNCNNNNNTTGTGGTTATTTCNNANNNNTCNCNNNCCNNANNANTCATCNTNCTCACNNCACCNNNNN  
NNCNCNNNNNTGTTGTTTTTNTTCTGATTGTTGATCANNNNNCTAANNAGCNGGCTNNTTTTCTTNNNNCAGAGNNNAA  
NNAACACGCCNACNNCATNCNCNCCNNTTANTCNNTCTTCAGANACGANNTCANNNNNACAAACTNNNNNGCGCNANAN  
ANANNATNTATCNCNNNACTCNNNNCTNGAAATANNNTACGANNNNNANANNAAAAANCANCCCTCTTGCGTGGNTNTN  
NACGAGAGTNNNTAGNNNNCNNNNCGNAAAAATNNNNNANACANNANAGNNNNNTGNNTTNATANNCGNCTANTNNTNGG  
ANNNNTNNGTNATCNANNTTNTNANNNNTNNNTGTTCNCTNTGNGCCTGAATTTCNCTNTNNTCCCCCNCNNNNNTNNNN  
NNCNGGCTATCNGGCNNNTTNTTTNTACNNTTNTGGAGGGAAGNNNNNNNNNNNNNNNN

>ben1\_R\_NPTII-F2

NNNNNNNNNGCGGNNNNNNNNNNNNNNNCNNNNNNCCGNNTNACNTNNCCATTTCGACCACCAAGCGAAACATCGCATC  
GAGCGAGCACGTACTCGGATGGAAGCCGGTCTNNGTCGATCAGGATGATCTGGACGAAGAGCATCAGGGGCTCGCGCCAG  
CCGAAGTTCGCCAGGCTCAAGGCGCGCATGCCGACGGCGATGATCTCGTGTGACCCATGGCGATGCCTGCTTGCCG  
AATATCATGGTGAAAATGGCCGCTTTTCTGGATTTCATCGACTGTGGCCGGCTGGGTGTGGCGGACCGCTATCAGGACAT  
AGCGTTGGCTACCCGTGATATTGCTGAAGAGCTTGGCGGCAATGGGCTGACCGCTTCTCTGCTGTTTACGGTATCGCCG  
CTCCCGATTTCGAGCGCATCGCCTTCTATCGCCTTCTTGACGAGTTCTTCTGAGCGGGACTCTGGGGNNCNAAATGAANN  
CATCATCNNTCNNNNNGACNGGTGGNGGGACNGNGTGCAGTAGCNAAGNCTAACAATAACATGACCATCTCGNNGGAG  
CTTTTTTCCACTTGAGAGACATTNCTTTTTGGCTGTACNNCNTCCTNNNCCCTCCCATCATCTTTNNGCANCNCNGCCAA  
NTNTCNTNCTCCTTTTTGNTTCTNNTTNTNNTCNCANCNNNTGGGCTGGCCNGGNGTCTCTTGTNTACTANGNNGNN  
TGGACGGACCCGNNNNNNNGGGTTCCGNTTCNNTANAAAANCGTACCTNNNNGNNGCNNAGGGNNNNNGCCCCAANNNG  
NAAAAANTCTTCGTNCNTNNNCCCCGNANNAAGNNNNATGNNCNAATANANANGACNGGCAAAAANGGNGNCNCTN  
NNNNGGNANTCNNNNNNNGGAGGGNCGGNGNNGGGTCNNGGNNNNAACNTNTTCNCAANNNNNNAANNNNNTGNNNC  
CCCNNNGNTNANTGNNTNGAANGANTTTTGTCTNCTNNNCTGGGNNNNNATCTNNNTTNCNCTNNNGGTTTNTANNGNN  
NNNNCCNCTCTCNCANNNNANTNNNNNAAGCNNNTANNNNGGGTTTTNNTTNNNNNTTTTTNNNNNCGNNANNTNTNN  
TNNCNTNNNNNNNNNNNNNNNNNTNNNNNGGGGNNNTTTTTNNGGNAAAAATGNNNANNNNNNNN

ben1\_O\_NPTII-F1 NNNNNNACNTNNNNGAGCCACTCAGCCGCGGGTTTTCTGGAGTTTAAATGAGCTAAGCACA  
ben1\_R\_NPTII-F1 NNNNNNACNTNNNANGANCCNCTCAGCCGCGGGTTTTCTGGAGTTTAAATGAGCTAAGCACA  
\*\*\*\*\* \*\* \* \*\*\*\*\*

ben1\_O\_NPTII-F1 TACGTCAGAAACCATTATTGCGCGTTCAAAGTTCGCTAAGGTCACTATCAGCTAGCAAA  
ben1\_R\_NPTII-F1 TACGTCAGAAACCATTATTGCGCGTTCAAAGTTCGCTAAGGTCACTATCAGCTAGCAAA  
\*\*\*\*\*

ben1\_O\_NPTII-F1 TATTTCTTGTCAAAAATGCTCCACTGACGTTCCATAAATCCCCTCGGTATCCAATTAGA  
ben1\_R\_NPTII-F1 TATTTCTTGTCAAAAATGCTCCACTGACGTTCCATAAATCCCCTCGGTATCCAATTAGA  
\*\*\*\*\*

ben1\_O\_NPTII-F1 GTCTCATATTCACTCTCAATCCAAATAATCTGCACCGGATCTGGATCGTTTCGCATGATT  
ben1\_R\_NPTII-F1 GTCTCATATTCACTCTCAATCCAAATAATCTGCACCGGATCTGGATCGTTTCGCATGATT  
\*\*\*\*\*

ben1\_O\_NPTII-F1 GAACAAGATGGATTGCACGCAGGTTCTCCGGCCGCTTGGGTGGAGAGGCTATTTCGGCTAT  
ben1\_R\_NPTII-F1 GAACAAGATGGATTGCACGCAGGTTCTCCGGCCGCTTGGGTGGAGAGGCTATTTCGGCTAT  
\*\*\*\*\*

```

ben1_O_NPTII-F1 GACTGGGCACAACAGACAATCGGCTGCTCTGATGCCGCCGTGTTCCGGCTGTCAGCGCAG
ben1_R_NPTII-F1 GACTGGGCACAACAGACAATCGGCTGCTCTGATGCCGCCGTGTTCCGGCTGTCAGCGCAG
*****

ben1_O_NPTII-F1 GGGCGCCCGGTTCTTTTGTCAAGACCGACCTGTCCGGTGCCCTGAATGAACTGCAGGAC
ben1_R_NPTII-F1 GGGCGCCCGGTTCTTTTGTCAAGACCGACCTGTCCGGTGCCCTGAATGAACTGCAGGAC
*****

ben1_O_NPTII-F1 GAGGCAGCGCGGCTATCGTGGCTGGCCACGACGGGCGTTCCTTGCGCAGCTGTGCTCGAC
ben1_R_NPTII-F1 GAGGCAGCGCGGCTATCGTGGCTGGCCACGACGGGCGTTCCTTGCGCAGCTGTGCTCGAC
*****

ben1_O_NPTII-F1 GTTGTCACTGAAGCGGGAAGGGACTGGCTGCTATTGGGCGAAGTGCCGGGGCAGGATCTC
ben1_R_NPTII-F1 GTTGTCACTGAAGCGGGAAGGGACTGGCTGCTATTGGGCGAAGTGCCGGGGCAGGATCTC
*****

ben1_O_NPTII-F1 CTGTCATCTCACCTTGCTCCTGCCGAGAAAGTATCCATCATGGCTGATGCAATGCGGGCG
ben1_R_NPTII-F1 CTGTCATCTCACCTTGCTCCTGCCGAGAAAGTATCCATCATGGCTGATGCAATGCGGGCG
*****

ben1_O_NPTII-F1 CTGCATACGCTTGATCCGGCTACCTGCCCATTCGACCACCAAGCGAAACATCGCATCGAG
ben1_R_NPTII-F1 CTGCATACGCTTGATCCGGCTACCTGCCCATTCGACCACCAAGCGAAACATCGCATCGAG
*****

ben1_O_NPTII-F1 CGAGCACGTACTCGGATGGAAGCCGGTCTTGTTCGATCAGGATGATCTG GACGAAGAGCAT
ben1_R_NPTII-F1 CGAGCACGTACTCGGATGGAAGCCGGTCTTGTTCGATCAGGATGATCTG GACGAAGAGCAT
*****

ben1_O_NPTII-F1 CAGGGGCTCGCGCCAGCCGAAGTGTTCGCCAGGCTCAAGGCGCGCATGCCCGACGGCGAT
ben1_R_NPTII-F1 CAGGGGCTCGCGCCAGCCGAAGTGTTCGCCAGGCTCAAGGCGCGCATGCCCGACGGCGAT
*****

ben1_O_NPTII-F1 GATCTCGTCGTGACCCATGGCGATGCCTGCTTGCCGAATATCATGGTGGAAAATGGCCGC
ben1_R_NPTII-F1 GATCTCGTCGTGACCCATGGCGATGCCTGCTTGCCGAATATCATGGTGGAAAATGGCCGC
*****

ben1_O_NPTII-F1 TTTTCTGGATTTCATCGACTGTGGCCGGCTGGGTGTGGCGACCCTATCNNNCATAAGCGT
ben1_R_NPTII-F1 TTTTCTGGATTTCATCGACTGTGGCCGGCTGGGTGTGGCGACCCTATCNNGACATAAGCGT
*****

ben1_O_NPTII-F1 TGGCTACCCGTGATATTGCTGAAGAGCTTGGCGGCGAATGGGCTGACCGCTTCCTCGTGC
ben1_R_NPTII-F1 TGGCTACCCGTGATATTGCTGAAGAGCTTGGCGGCGAATGGGCTGACCGCTTCCTCGTGC
*****

ben1_O_NPTII-F1 TTTACGGTATCGCCGCTCCCGATTTCGACGCGCATCNCCTTCTATCGCCTNCTTGACNAGT
ben1_R_NPTII-F1 TTTACGGTATCGCCGCTCCCGATTTCGACGCGCATCNCCTTCTATCGCCTTCTTGACGANT
*****

ben1_O_NPTII-F1 TCTTCTGANCGGNNNNNNNNNNGGGNNNNNNNNNNNNNNNNNAAAAGNAN
ben1_R_NPTII-F1 TCTTCTGANCGGNNNNNNNNNNNNNNNNGGNNGNNNANNNNNAA-----
*****

ben1_O_NPTII-F2 -NNNNNNNGNGGCGGNNGCNNNNNNCNNNNNTCCGGCTNACCTNCCATT--CGACC
ben1_R_NPTII-F2 NNNNNNNNGCGGNNNNNNNNNNNNNNNNCNNNNNNCCGNNTNACNTNCCATTTNCGACC
*****

```

```

ben1_O_NPTII-F2 ACCAAGCGAAACATCGCATCGAGCGAGCACGTACTCGGATGGAAGCCGGTCTTG-TCGAT
ben1_R_NPTII-F2 ACCAAGCGAAACATCGCATCGAGCGAGCACGTACTCGGATGGAAGCCGGTCTNNGTCGAT
*****
ben1_O_NPTII-F2 CAGGATGATCTGGACGAAGAGCATCAGGGGCTCGCGCCAGCCGAACTGTTTCGCCAGGCTC
ben1_R_NPTII-F2 CAGGATGATCTGGACGAAGAGCATCAGGGGCTCGCGCCAGCCGAACTGTTTCGCCAGGCTC
*****
ben1_O_NPTII-F2 AAGGCGCGCATGCCCGACGGCGATGATCTCGTCGTGACCCATGGCGATGCCTGCTTGCCG
ben1_R_NPTII-F2 AAGGCGCGCATGCCCGACGGCGATGATCTCGTCGTGACCCATGGCGATGCCTGCTTGCCG
*****
ben1_O_NPTII-F2 AATATCATGGTGGAAAATGGCCGCTTTTCTGGATTCATCGACTGTGGCCGGCTGGGTGTG
ben1_R_NPTII-F2 AATATCATGGTGGAAAATGGCCGCTTTTCTGGATTCATCGACTGTGGCCGGCTGGGTGTG
*****
ben1_O_NPTII-F2 GCGGACCGCTATCAGGACATAGCGTTGGCTACCCGTGATATTGCTGAAGAGCTTGGCGGC
ben1_R_NPTII-F2 GCGGACCGCTATCAGGACATAGCGTTGGCTACCCGTGATATTGCTGAAGAGCTTGGCGGC
*****
ben1_O_NPTII-F2 GAATGGGCTGACCGCTTCCCTCGTGCTTTACGGTATCGCCGCTCCCGATTCGCAGCGCATC
ben1_R_NPTII-F2 GAATGGGCTGACCGCTTCCCTCGTGCTTTACGGTATCGCCGCTCCCGATTCGCAGCGCATC
*****
ben1_O_NPTII-F2 GCCTTCTATCGCCTTCTTGACGAGTTCTTCTGAGCGGGACTCTGGGGNN-GAAATGAAAG
ben1_R_NPTII-F2 GCCTTCTATCGCCTTCTTGACGAGTTCTTCTGAGCGGGACTCTGGGGNNCNAATGAAANN
*****

```

**File S5**

*BEN1* BL-100 analysis

**File S6**

Fluence rate analysis

**File S7**

Next generation unstable *ben1-1* Hypocotyl data

**File S8**

Real time RT-PCR Expression data

Files S5-S8 are available for download at <http://www.g3journal.org/lookup/suppl/doi:10.1534/g3.113.006353/-/DC1>.

**Table S1 Table of PCR primer sequences used in the study.**

| <b>Primer Name</b> | <b>Primer Sequences</b>           |
|--------------------|-----------------------------------|
| GSP1               | 5'-TTTATATCTTCGTCGTTGCCT-3'       |
| GSP2               | 5'-ACCTTTTGCAACTGGCTTTT-3'        |
| LBb1.3             | 5'-ATTTTGCCGATTTTCGGAAC-3'        |
| PRT1               | 5'-ATGGTGAGAGAAGAACAAGA-3'        |
| PRT2               | 5'-TTAAAGAAATCCCCTTGCTTG-3'       |
| PQ1                | 5'-ATCTCTCGCCATGCTCTTTG-3'        |
| PQ2                | 5'-CTTCATCTCCACCGACGAAC-3'        |
| UBQ1               | 5'-GAAATGCATGGAGACGGATT-3'        |
| UBQ2               | 5'-TTGGTCTCTGCTCCCACTCT-3'        |
| ACTIN2 RT-F        | 5'-GGTCGTACAACCGGTATTGTGCTGG-3'   |
| ACTIN2 RT-R        | 5'-CTGTGAACGATTCTGGACCTGCC-3'     |
| PQ3                | 5'-TCTAAACAAGGAATTCGAGGTC-3'      |
| PQ4                | 5'-AACCAGAAATGTAGCACCGT-3'        |
| NPT-Fv1/MT1        | 5'-ACAAGCCGTTTTACGTTTGG-3'        |
| NPT-Rv             | 5'-TCATTTCGAACCCAGAGTC-3'         |
| MT2                | 5'-ATACTTTCTCGGCAGGAGCA-3'        |
| MT3                | 5'-TTCGCAAGACCCTTCTCTA-3'         |
| MT4                | 5'-GTTTTCCAGTCACGACGTT-3'         |
| NPT-Fv2            | 5'-TGCTCCTGCCGAGAAAGTAT-3'        |
| pNOS-BS-F          | 5'-GGGTTTTYTGAGTTTAATGAGYTAAG-3'  |
| pNOS-BS-R          | 5'-CACTTCRCCAATARCARTCCCTTCC-3'   |
| pBEN1-BS-F         | 5'-GTATAGTAGTAAAAAAGAAGAAGAAG-3'  |
| pBEN1-BS-R         | 5'-CTTRTTCTTCTCTACCATTTTCTCTCT-3' |
| BEN1-E2-BS-F       | 5'-TTAGGAATTAAGGAGAAGAG-3'        |
| BEN1-E2-BS-R       | 5'-AATTAATACCAAAAAACATAAC-3'      |
