# Supplementary material for: The ben1-1 Brassinosteroid-Catabolism Mutation Is Unstable Due to Epigenetic Modifications of the Intronic T-DNA Insertion
Source: PubMed Central journal article supplement (PMC3755919; doi:10.1534/g3.113.006353), 2013-09-01
Supplement: supp_g3.113.006353_FigureS2.pdf [file supp_g3.113.006353_FigureS2.pdf]

```

ben1_O_NPTII-F1 NNNNNNNACNTNNNNGAGCCACTCAGCCGCGGGTTTCTGGAGTTTAATGAGCTAAGCACA
ben1_R_NPTII-F1 NNNNNNNACNTNNNANGANCCNCTCAGCCGCGGGTTTCTGGAGTTTAATGAGCTAAGCACA
*****

ben1_O_NPTII-F1 TACGTCAGAAACCATTTATTGCGCGTTCAAAAGTCGCCTAAGGTCACCTATCAGCTAGCAAA
ben1_R_NPTII-F1 TACGTCAGAAACCATTTATTGCGCGTTCAAAAGTCGCCTAAGGTCACCTATCAGCTAGCAAA
*****

ben1_O_NPTII-F1 TATTTCTTGTCAAAAATGCTCCACTGACGTTCCATAAATCCCCTCGGTATCCAATTAGA
ben1_R_NPTII-F1 TATTTCTTGTCAAAAATGCTCCACTGACGTTCCATAAATCCCCTCGGTATCCAATTAGA
*****

ben1_O_NPTII-F1 GTCTCATATTCACTCTCAATCCAAATAATCTGCACCGGATCTGGATCGTTTCGCATGATT
ben1_R_NPTII-F1 GTCTCATATTCACTCTCAATCCAAATAATCTGCACCGGATCTGGATCGTTTCGCATGATT
*****

ben1_O_NPTII-F1 GAACAAGATGGATTGCACGCAGGTTCTCCGCGCGCTTGGGTGGAGAGGCTATTCGGCTAT
ben1_R_NPTII-F1 GAACAAGATGGATTGCACGCAGGTTCTCCGCGCGCTTGGGTGGAGAGGCTATTCGGCTAT
*****

ben1_O_NPTII-F1 GACTGGGCACAACAGACAATCGGCTGCTCTGATGCCGCGGTTCGGCTGTCAGCGCAG
ben1_R_NPTII-F1 GACTGGGCACAACAGACAATCGGCTGCTCTGATGCCGCGGTTCGGCTGTCAGCGCAG
*****

ben1_O_NPTII-F1 GGGCGCCCGGTTCTTTTGTCAAGACCGACCTGTCCGGTGCCCTGAATGAACTGCAGGAC
ben1_R_NPTII-F1 GGGCGCCCGGTTCTTTTGTCAAGACCGACCTGTCCGGTGCCCTGAATGAACTGCAGGAC
*****

ben1_O_NPTII-F1 GAGGCAGCGCGGCTATCGTGGCTGGCCACGACGGGCGTTCCTTGCGCAGCTGTGCTCGAC
ben1_R_NPTII-F1 GAGGCAGCGCGGCTATCGTGGCTGGCCACGACGGGCGTTCCTTGCGCAGCTGTGCTCGAC
*****

ben1_O_NPTII-F1 GTTGTCACTGAAGCGGGAAGGGACTGGCTGCTATTGGGCGAAGTGCCGGGGCAGGATCTC
ben1_R_NPTII-F1 GTTGTCACTGAAGCGGGAAGGGACTGGCTGCTATTGGGCGAAGTGCCGGGGCAGGATCTC
*****

ben1_O_NPTII-F1 CTGTCATCTCACCTTGCTCCTGCCGAGAAAGTATCCATCATGGCTGATGCAATGCGGCGG
ben1_R_NPTII-F1 CTGTCATCTCACCTTGCTCCTGCCGAGAAAGTATCCATCATGGCTGATGCAATGCGGCGG
*****

ben1_O_NPTII-F1 CTGCATACGCTTGATCCGGCTACCTGCCATTTCGACCACCAAGCGAAACATCGCATCGAG
ben1_R_NPTII-F1 CTGCATACGCTTGATCCGGCTACCTGCCATTTCGACCACCAAGCGAAACATCGCATCGAG
*****

ben1_O_NPTII-F1 CGAGCACGTACTCGGATGGAAGCCGGTCTTGTCGATCAGGATGATCTGGACGAAGAGCAT
ben1_R_NPTII-F1 CGAGCACGTACTCGGATGGAAGCCGGTCTTGTCGATCAGGATGATCTGGACGAAGAGCAT
*****

```

```

ben1_O_NPTII-F2 ACCAAGCGAAACATCGCATCGAGCGAGCACGTACTCGGATGGAAGCCGGTCTTG-TCGAT
ben1_R_NPTII-F2 ACCAAGCGAAACATCGCATCGAGCGAGCACGTACTCGGATGGAAGCCGGTCTNNGTCGAT
*****

ben1_O_NPTII-F2 CAGGATGATCTGGACGAAGAGCATCAGGGGCTCGCGCCAGCCGAACGTTCGCCAGGCTC
ben1_R_NPTII-F2 CAGGATGATCTGGACGAAGAGCATCAGGGGCTCGCGCCAGCCGAACGTTCGCCAGGCTC
*****

ben1_O_NPTII-F2 AAGGCGCGCATGCCGACGGCGATGATCTCGTCGTGACCCATGGCGATGCCTGCTTGCCG
ben1_R_NPTII-F2 AAGGCGCGCATGCCGACGGCGATGATCTCGTCGTGACCCATGGCGATGCCTGCTTGCCG
*****

ben1_O_NPTII-F2 AATATCATGGTGGAAAATGGCCGCTTTTCTGGATTTCATCGACTGTGGCCGGCTGGGTGTG
ben1_R_NPTII-F2 AATATCATGGTGGAAAATGGCCGCTTTTCTGGATTTCATCGACTGTGGCCGGCTGGGTGTG
*****

ben1_O_NPTII-F2 GCGGACCGCTATCAGGACATAGCGTTGGCTACCCGTGATATTGCTGAAGAGCTTGCGCGC
ben1_R_NPTII-F2 GCGGACCGCTATCAGGACATAGCGTTGGCTACCCGTGATATTGCTGAAGAGCTTGCGCGC
*****

ben1_O_NPTII-F2 GAATGGGCTGACCGCTTCCTCGTGCTTTACGGTATCGCCGCTCCCGATTTCGCAGCGCATC
ben1_R_NPTII-F2 GAATGGGCTGACCGCTTCCTCGTGCTTTACGGTATCGCCGCTCCCGATTTCGCAGCGCATC
*****

ben1_O_NPTII-F2 GCCTTCTATCGCCTTCTTGACGAGTTCTTCTGA GCGGGACTCTGGGGNN-GAAATGAAAG
ben1_R_NPTII-F2 GCCTTCTATCGCCTTCTTGACGAGTTCTTCTGA GCGGGACTCTGGGGNNCNAATGAANN
*****

```

**Figure S2** *NPTII* gene sequence did not change in the pre-triple and post-triple *ben1-1* mutants. The *NPTII* gene was amplified using NPT-Fv1, NPT-Fv2 and NPT-Rv from the pre-triple and post-triple *ben1-1* lines. Primers NPT-Fv1 and NPT-Fv2 were used for sequencing *NPTII* gene (Table S1). The color coded yellow nucleotides show the complete *NPTII* coding region in the sequence.
