# Supplementary material for: The ben1-1 Brassinosteroid-Catabolism Mutation Is Unstable Due to Epigenetic Modifications of the Intronic T-DNA Insertion
Source: PubMed Central journal article supplement (PMC3755919; doi:10.1534/g3.113.006353), 2013-09-01
Supplement: supp_g3.113.006353_FigureS3.pdf [file supp_g3.113.006353_FigureS3.pdf]

(A)

```

ben1_O_pBEN1_BST GGAATTTAATAATAATGTTTGTAAATAAATGGATAAAGAATGTGAATTATTTATATAAAATG
ben1_T_pBEN1_BST GGAATTTAATAATAATGTTTGTAAATAAATGGATAAAGAATGTGAATTATTTATATAAAATG
Col-0_BST GGAATTTAATAATAATGTTTGTAAATAAATGGATAAAGAATGTGAATTATTTATATAAAATG
Col-0_no_BST GGAATCCAATAACAATGTTTGTAAATAAACGGACAAAGAATGTGAATTATTCACATAAAATG
*****

```

```

ben1_O_pBEN1_BST ATTTGTAAAATGTGAGTATTTGATTATAATGGATATAATAAAAATAAAAATTGTAATAAAG
ben1_T_pBEN1_BST ATTTGTAAAATGTGAGTATTTGATTATAATGGATATAATAAAAATAAAAATTGTAATAAAG
Col-0_BST ATTTGTAAAATGTGAGTATTTGATTATAATGGATATAATAAAAATAAAAATTGTAATAAAG
Col-0_no_BST ATCTGTAAAATGTGAGCATTGATTATAACGGATATAATAAAAACAAAATTGTAATAAAG
**

```

```

ben1_O_pBEN1_BST AGAGAAGAGGGTAAAATGGGGAATATGTTATGTGGATAGGTGTGAGAGAGTAAATGATGT
ben1_T_pBEN1_BST AGAGAAGAGGGTAAAATGGGGAATATGTTATGTGGATAGGTGTGAGAGAGTAAATGATGT
Col-0_BST AGAGAAGAGGGTAAAATGGGGAATATGTTATGTGGATAGGTGTGAGAGAGTAAATGATGT
Col-0_no_BST AGAGAAGAGGGCAAAACGGGGAACATGTCACGCGGATAGGTGTGAGAGAGTAAATGACGT
*****

```

```

ben1_O_pBEN1_BST AGGTTTTGTTATTTAAGAATTTTTTTAGAGAGGTTTTTATATAT-AGNNG-----
ben1_T_pBEN1_BST AGGTTTTGTTATTTAAGAATTTTTTTAGAGAGGTTTTTATATATTAGAAGAGAGAGAAAG
Col-0_BST AGGTTTTGTTATTTAAGAATTTTTTTAGAGAGGTTTTTATATATTAGAAGAGAGAGAAAG
Col-0_no_BST AGGTTCCGTTATTTAAGAACCCTTCTAGAGAGGTCCC-ACACACCAGAAGAG-----
*****

```

```

ben1_O_pBEN1_BST -----
ben1_T_pBEN1_BST AGATAGAGAGAAAATGGTG
Col-0_BST AGATAGAGAGAAAATGGTG
Col-0_no_BST -----

```

(B)

```

ben1_O_Ex2_BST GGTGGTGTGTTGAGTTTGGTGGGAAGAATGGGTTAGAGGTTGTGATGTTTGTATTTTTTTT
ben1_T_Ex2_BST GGTGGTGTGTTGAGTTTGGTGGGAAGAATGGGTTAGAGGTTGTGATGTTTGTATTTTTTTT
Col-0_BST GGTGGTGTGTTGAGTTTGGTGGGAAGAATGGGTTAGAGGTTGTGATGTTTGTATTTTTTTT
Col-0_no_BST GCGGCGCTTGAGTTCGGTGGGAAGAATGGGTTAGAGGTTGTGACGCTCGTTATTCCCTCT
**

```

```

ben1_O_Ex2_BST TGTTGTTGGATTTTTTATATTTTTTGTGTTGTTTTTTTTTGTTTTTTATATTTTTTGTAT
ben1_T_Ex2_BST TGTTGTTGGATTTTTTATATTTTTTGTGTTGTTTTTTTTTGTTTTTTATATTTTTTGTAT
Col-0_BST TGTTGTTGGATTTTTTATATTTTTTGTGTTGTTTTTTTTTGTTTTTTATATTTTTTGTAT
Col-0_no_BST CGTCGTCGGACCTTTTATATCTTCGTCGTTGCCTTCCCTCCGTCTTCATATCTCTGCCAT
**

```

```

ben1_O_Ex2_BST GTTTTTTG/GTATTTAA
ben1_T_Ex2_BST GTTTTTTG/GTATTTAA
Col-0_BST GTTTTTTG/GTATTTAA
Col-0_no_BST GCTCTTTG/GTACTTAA
*

```

**Figure S3 Genomic DNA in the *BEN1* Promoter and *BEN1* 2<sup>nd</sup> Exon-Intron junction does not show any methylation in both the pre-triple *ben1-1* and the *bas1-2 sob7-1 ben1-1* triple-mutant lines.** (A) *BEN1* promoter DNA was amplified using primers pBEN1-BS-F and pBEN1-BS-R from the bisulfite converted genomic DNA from the Col-0, pre-triple *ben1-1* and the triple-mutant lines. (B) *BEN1* DNA from the 2<sup>nd</sup> Exon-Intron junction was amplified using primers BEN1-E2-BS-F and BEN1-E2-BS-R from the bisulfite converted genomic DNA from the Col-0, pre-triple *ben1-1* and the triple-mutant lines. BST= bisulfite treatment. ben1\_O= pre-triple *ben1-1*, and ben1\_T= *bas1-2 sob7-1 ben1-1* triple-mutant.
