# Supplementary material for: The ben1-1 Brassinosteroid-Catabolism Mutation Is Unstable Due to Epigenetic Modifications of the Intronic T-DNA Insertion
Source: PubMed Central journal article supplement (PMC3755919; doi:10.1534/g3.113.006353), 2013-09-01
Supplement: supp_g3.113.006353_FileS1.pdf [file supp_g3.113.006353_FileS1.pdf]

Bisulfite *BEN1* 2<sup>nd</sup> exon raw sequences

ACCAGAAGAGAGAGAAAAGAGACAGAGAGAAAATGGTGAGAGAAGAACAAGAAGAAGATGACAACAACAACAACAACCGGAGG  
 AGGAGAGAGAAAGCTGCTTGTGGCTGATGAAACGGTGCCGCTTTGTTGGACGAAACGGGGTTGGTTTGTGTAACGGGAGGTTCTG  
 GTTTCGTTGCTTCTGGCTCATCATGCGTCTCCTTCAACGTGGCTACTCCGTTCCGGCCACGGTTCGAACCAACTCAGGTTTCGAGTTAA  
 TTAACCTCACTTTCTCTTACTTATACACTTTGAATCATCATCACTGATTAAGCAAATGCCAATAAAATTATTGTTGTCATATATGGCTGA  
 TTGGTCCGTTTTAACATAAAGTACATAAATAGAAAGATAGATTATAGTTTTTTTTTATATATAGAGAGAGATAACATTTAAAGTTGAT  
 TTTTGGATCGACAATTAATAATATATATATTTTTATGGATGTGAAAATTTATTGACTTGGCTGGAATTATCTGTCAGTTTGTAGGAT  
 CTTGAAGCTTCATAGCTATGTAAATATGTCATGTTCCATGCATCTTCTATAGAAAGTCAACCATATATTTTATGATCAATAACTAATAA  
 GTAATCACGGACCATAAGATATAAATGAAGTTAATAATTCATAAGTTTGTATTTTATGTCATATTACAGAAAGGGAATAAGAAAGATA  
 TAAGCTACCTAACCGAGCTACCATTTGCATCGGAGAGGCTTCAAATATTCACCGCCGATCTCAACGAACCGGAGAGCTTCAAACCGG  
 AATCGAAGGATGCAAAGCCGATTCCACGTGGCACATCTATGGACCCAAACAGCAACGAAACAGAAGAGACCGTTACGAAACGTA  
 CTGTGCAAGGTCTCATGGGGATACTAAAGTCGTGTTTGGACGCTAAAACCGTGAAACGTTTTTCTACACGTCAAGCGCCGTGACTGT  
 TTTCTATAGCGGTGGAAACGGCGGTGGAGGAGGCGAAGTAGACGAGAGCGTTTGGAGCGACGTGCGAGGTGTTTAGGAATCAAAG  
 GAGAAGAGGGTGAGTAGCTTACGTCGTGTCGAAAATGGCGGCGGAGACGGCGGCGCTTGAGTTCGGTGGGAAGAATGGGTTAG  
 AGGTTGTGACGCTCGTTATTCCTCTCGTCGTCGGACCTTTATATCTTCGTCGTTGCCTTCTCCGTCTTCATATCTCTCGCCATGCTCTT  
 TGGTACTTAATTCATATCTAATAAGTTTTTATTTTATTTTCTCCATGATTAATAACTAAAGCTGAAAATTAATAATTTAAAAACTTAA  
 CCACTTTGATTACGTATACGTTATATATAGGTATTAATTTTAAAACTAACCAAACCTTTATTTCTCAAATAAAGTAAAGTAAATTCAT  
 AGTACTAGCCTACTAGCTAGCTTGTACTC(insertion)TAGTAGTAGTTAAATGGTTTATGGTTGGTTCACCAAGTATCTTGGGAGATCA  
 TAGCTCGAATTTTCTCAAAAAAAAAATTTTGAACAAATGCTCGAATTTTCTCATTATACTTTTGTTTAAATGAAAAAAAAATTTCTGC  
 TCAGGCTTAGTAGATTTATGTTTGGACATAGTGGCTATTGAAAATGTTAGAATTCGAACCAAATATGTATATTTTATACGAAAAAAC  
 AGAACTAAAATCCTAATTACTATACGTAATAAATAAATCTTTTCTTTGCTTATAACCTACGTGCGTGGAAATTTTGTAGTTATTTAGA  
 ACGAATTTTGTGTGTGTTAACTCGTGTAACATGTGCTAATAATATTACAAATAGTGTTTTGTAGTAATAATCACTATTCATATAGT  
 AATATTACGTTTTTTATGAAGGAAATTACAAGGAGAAGTATTTGTTTGTACTTACAATATGGTGCATATTGATGATGTGGCAAGGG  
 CGATGATATTTCTATTAGAAAAGCCAAGTTGCAAAAGGTAGATATATTTGTTTCGTCGGTGGAGATGAAGATCGATGAGGTCTTTGAGT  
 TTTTGTCTACGAAATTTCTCAGTTTCTCAGCTACCTTCAATAGAGTATGTCATTTTTTACTAGTATAATTAATTTACGTGTAATATTCTA  
 TTGTTTTTTTCCAAGAGTTTTTATTATGTTCTTTTTTGTGTGGGTACGTAAGTTTGAATAAATATAAAGTAGAGAAGAGGATGGGTC  
 TTTCATCGAAGAAGCTGAAAAGTGCCGGGTTCAAGTATGGAGCCGAGGAAATATTCAGTGGAGCTATAAGGAGCTGTCAA  
 GCAAGGGGATTTCTTTAAATCTTATGGGATTTTGTGTTAAATTTGTATATGAATTGAAAATATGTTTTTCTTTATTGGCCATTTCC  
 GTTTTGTAACATGTTCTAGTACTTGTGACGAAAAAAAAAGAAAGTGTTTTGATTGAG

BLUE=Exons; Black=Introns

### Primers:

BEN1-E2-BS-F: TTAGGAATTAAGGAGAAGAG

BEN1-E2-BS-R: AATTAATACCAAAAAACATAAC

### Replicate 1

>PK\_329142-505\_11\_BS3\_E04.ab1/>Col-0\_BST  
 NNNNNNNNNNNNGNTGTGTTGANTGGTGGTGGAGATGGTGGTGGTTGAGTTTGGTGGGAAGAATGGGTTAGAGGTTGTGA

TGTTTGTATTTTTTTTTGTTGTTGGATTTTTATATTTTTGTTGTTGTTTTTTTTGTTTTTATATTTTTTGTATGTTT  
TTTGGTATTTAATTAATCCANCCGCTNTCNNAGCAACTTGNCCNNNNACCCCTCGAACGNCTCNNNTCCCCCTCCC  
CGGCCCCCAGCTACNAACNCNCTCATCCNAAGGCTCCANCTAAAACCGTGACTNNTNCCGTCCCAATTAAGAANGTG  
TCTCNNTAAACAAANNTGCNCCCCNANGACCACCGGTGTCAAACACTTCACTCNTNNAACCTGAAGCCAAANAATCATN  
GCCTCNNTTNTGACCCNAANCTCGGAGGGACGCCNTNATATNNNANCTTCCCCNCTCCTCTCCCCNCTTACCCGAN  
ACNNAANCCCGACTGCCCNCTCNACNTTCTCAGCCTCCGACAGCGACGCGTATTGATCTCCNCTTTAACTCCCNCTC  
ACNCACTCTTNGGGTCATNNACCCNCTNCNCCNNNNNTNAGTTTGTAAATTATCTCAGGCCCA

>PK\_329142-506\_12\_BS3\_F04.ab1/>ben1\_O\_Ex2\_BST

NNNNNNNNNNNGNTGTGTTGANTGGTGGTGGAGANGGTGGTGGTTTGGAGTTTGGTGGGAAGAATGGGTTAGAGGTTGTGA  
TGTTTGTATTTTTTTTTGTTGTTGGATTTTTATATTTTTGTTGTTGTTTTTTTTGTTTTTATATTTTTTGTATGTTT  
TTTGGTATTTAATTANCCAACNCNACNCANNGCCNNTNNAACCCATAACCCCNANANNCTNNTCGTACNCCCCCNCC  
NGNCCCCCTCNCNNGAACNCCCAGCCCCGACGGGTCCATCNTANGNCNCGACGGCCCGCGGTGCCAGATANCCAATGG  
GCTNCCNAATGAAACNCAACNCCNAGNCCGAGCAGNTCAAACGNCCNCCATCCACNGNGAAGGACGAACANCA  
NANNCTCTATCTGGCCNCCNGTNNGCCNNGNCCGCTCACNGTCCACCACCNACCNAACCCNCTATNCCNATCAAG  
ACACNCCNCCNACCTGCGNCTGTCACTCCAGGCNCCNACANCGCCGNCCTAGNGCGCTCTCCTCNAGCTCCCCC  
ATCNNTTCTGAGNTACNCANCCACCTGCNCTCCCCNCGATTNCCATNACAANAGCCNAT

>PK\_329142-507\_13\_BS3\_G04.ab1/>ben1\_R\_Ex2\_BST

NNNNNNNNNNNGNTGTGTTGANTGGTGGTGGAGATGGTGGTGGTTTGGAGTTTGGTGGGAAGAATGGGTTAGAGGTTGTGATG  
TTTGTATTTTTTTTTGTTGTTGGATTTTTATATTTTTGTTGTTGTTTTTTTTGTTTTTATATTTTTTGTATGTTTTT  
TGGTATTTAATANCCAANCGCCTTACAGCAACCTGGCCCCAAAACCCCTTCGAATGCCTCTCNTCCAACCCCTCCTCT  
CCCCNACNCTANNNNCNACCCNACTCCNGCGGTCCANCCAACANNCTTCCNCCNNTCCCCATCTNANCCGGCCTT  
CNCNNAACATGATCCNCCNANGGCCNANGGCGNCAANACCGCATCCCTCCATGGNNGAAGCTTGACCATCACNGAC  
TCAATATCTGACTCCCAGCCCCGAGAGAGGGCCGAACNTCACCCACCCGCCNNAACCCCCATNNTTCTCGATAC  
NGATCCATGNCTGCGACTTGCCTCTTCCCTTGAGTGCNATCGCGGTGCGTAGTGATCTACTCCTCCNACTTCGCCCTGCA  
CACACTCATTTNNTTTACTANNATGATCNNTTCCNCCNCCNCCNCAATTATCNCAAGGCACCATTNNAANNN  
AA

>PK\_329142-508\_14\_BS3\_H04.ab1/>ben1\_T\_Ex2\_BST

NNNNNNNNNNNGNTGTGTTGANTGGTGGTGGAGATGGTGGTGGTTTGGAGTTTGGTGGGAAGAATGGGTTAGAGGTTGTGA  
TGTTTGTATTTTTTTTTGTTGTTGGATTTTTATATTTTTGTTGTTGTTTTTTTTGTTTTTATATTTTTTGTATGTTTT  
TTTGGTATTTAANNNNCCNCCNCCNCCNCCNCCNCCNANTCCCCNCGNANGCNNTCNTCCCTCCCCCTCCTCN  
CCCCACTCTTNCNCCCCCCCCGACCCNACGGCTCCANCCNACGATCNTTCCCCCNCCNCCNCTTCGCAGANGGNNAGN  
CNNCACCNAACATGATCCCCCAGGGCCAAAGGCGTCAAAGACAGCTTCCNCGCANGGNGAAGNATGACAATCACCCAC  
TCAATATCGGACCCCCAGCCCCGANAGAGGCCCCCAACTTCAACCCCCCGCCNCGACCCCTTNTNCGTTNCCCGACC  
CTGANNACGGNCCCGACTTGCCTCTTCCATTGAGTGAAATCGCGCTGCGTACCGACCCACTCCTCACACCTCNCCGCA  
CACTACNTCCGNTTTACCAANNNNATCCGTCNNNCCCTCANNTCNCCNATTATCACAGGCCCATTNANNNNNNN  
N

>PK\_329142-519\_11\_BS4\_E06.ab1/>Col-0\_BST

NNNNNNNNNANNNAAAAATATAAAAAATCCAACAACAAAAAATAACAAACATCACAACCTCTAACCCATTCTTCCCACC  
AAACTCAAACACCACCATCTCCACCACCATTTTCAACACAACATAAAAACTACTACCCTCTTCTCCTTTTAATTCTTAA  
AANNGGNGNNGNACNANNANGGNNNTGNNTNCCNATACTNCTCCGGGNGAGCGAGACTACGCTATNTGNTGAGAGGAGT  
TGTTNGAGCGAAATNCCATNANAAAAAGGACAT

>PK\_329142-520\_12\_BS4\_F06.ab1/>ben1\_O\_Ex2\_BST

NNNNNNNNNANNNAAAAATATAAAAAATCCAACAACAAAAAATAACAAACATCACAACCTCTAACCCATTCTTCCCACC  
AAACTCAAACACCACCATCTCCACCACCATTTTCAACACAACATAAAAACTACTACCCTCTTCTCCTTTTAATTCTTAA  
AAANGTANGNNGAGGGCTNNGNNGGTGAGTGTGACCATCTTCTTCTGGAGGACGTGCCAAAANTTTACTCCTAANCNAGG  
TGATTTNCGAGGGCCACCCATGGNGAANCNATCGAGTTGAGGGGCATCCTCTTCNAGGAGGACAGAAANNTCN

>PK\_329142-521\_13\_BS4\_G06.ab1/>ben1\_R\_Ex2\_BST

NNNNNNNNNANANNAAAAATATAAAAAATCCAACAACAAAAAATAACAAACATCACAACCTCTAACCCATTCTTCC  
CACCAACTCAAACACCACCATCTCCACCACCATTTTCAACACAACATAAAAACTACTACCCTCTTCTCCTTTTAATTCT  
CTAAAANNNGANGGNGTANGGNGANCTTGTCTACATNCTNCGGGCNCCTGCTNTGACTCCANCCNCTGGGCCCCG  
TGTTTTCCGGGCNATCCCATGNACAATAGNCCAGGATCCGGAATGTTCCCGTCCCANGCTTGAACCNCTCNGATCNC

ATTGGTGAANACNANATTACGAACANTCTCNAGTCANCTATTTTTNGTGTACGGACTAANAGNATCANNGTANNCTTCTA  
AATTGTCCACNACAACCNAGNANGTTCCNCCACGGTCGCTCATCGGCCCGGGCTACCCTCANNCTGCATACAGACTGAT  
TGGATGACNCAACATCCTNNNTTTGATGAAGGCGATATTCNAGATTAGNTACNTAATGCTNANTCTTAANTCTCTCANAC  
TGNTGCATTGGGGACCNTAANGCNCATGCTCTCTNTNCCTAGNCGAACCNACTATAACCTTCNTCTGN

>PK\_329142-522\_14\_BS4\_H06.ab1/>ben1\_T\_Ex2\_BST  
NNNNNNNNNNNNNNNNNANNNAAAAATATAAAAAATCCAACAACAAAAAAATAACAAACATCACAACCTCTAACCCATTCT  
TCCCACCAAACCTCAAACACCACCATCTCCACCACCATTTTCAACACAACATAAAAACTACTCACCTCTCTCCTTTTAA  
TTCCTAAATNNGCCNGNGGGTTNGNGGGGNGGGGNCGGTCTTCTNTCGGGATGGGNCNGACTNACNNGCTGTGAANGTGGT  
TTCGGGNNATACNCCCNGGAGAACCACATCGCTCTGAGGGGCATCCTCTTGGAGGANANCGAAACGTCTGGGGGAGNNG  
TGGAGTACAANNNGANNNACCACAGCNTTANCNTGNTGGCGGACAAGAATAAGGGTNGCATTGTTGAACTTCATGATC  
CACCTGTACTCGAAGGCTGGTGTGTAGCTNANCNACCNTGCCTACAGCTCAGCCCNNGGANNGACCGGCCCTGGTGGC  
GGCCCGAACTNNTTNCCTGATC

ben1\_O\_Ex2\_BST GGTGGTGTGTTGAGTTTGGTGGGAAGAATGGGTTAGAGGTTGTGATGTTTGTATTTTTTTT  
ben1\_T\_Ex2\_BST GGTGGTGTGTTGAGTTTGGTGGGAAGAATGGGTTAGAGGTTGTGATGTTTGTATTTTTTTT  
Col-0\_BST GGTGGTGTGTTGAGTTTGGTGGGAAGAATGGGTTAGAGGTTGTGATGTTTGTATTTTTTTT  
Col-0\_no\_BST GGCGGCGCTTGAGTTCGGTGGGAAGAATGGGTTAGAGGTTGTGACGCTCGTTATTCTCT  
\* \* \* \* \* \* \* \* \* \* \* \* \* \* \* \* \* \* \* \* \* \* \* \* \* \* \* \* \* \* \* \* \* \* \* \* \* \* \* \* \* \* \*

ben1\_O\_Ex2\_BST TGTTGTTGGATTTTTTATATTTTTTGTGTTGTTTTTTTTTTGTTTTTATATTTTTTGTAT  
ben1\_T\_Ex2\_BST TGTTGTTGGATTTTTTATATTTTTTGTGTTGTTTTTTTTTTGTTTTTATATTTTTTGTAT  
Col-0\_BST TGTTGTTGGATTTTTTATATTTTTTGTGTTGTTTTTTTTTTGTTTTTATATTTTTTGTAT  
Col-0\_no\_BST CGTCGTCGGACCTTTTTATATCTTCGTCGTTGCCTTCCTCCGTCTTCATATCTCTCGCCAT  
\* \* \* \* \* \* \* \* \* \* \* \* \* \* \* \* \* \* \* \* \* \* \* \* \* \* \* \* \* \* \* \* \* \* \* \* \* \* \* \* \* \* \*

ben1\_O\_Ex2\_BST GTTTTTTG/GTATTTAA  
ben1\_T\_Ex2\_BST GTTTTTTG/GTATTTAA  
Col-0\_BST GTTTTTTG/GTATTTAA  
Col-0\_no\_BST GCTCTTTG/GTACTTAA  
\* \* \* \* \* \* \* \* \* \* \* \* \* \* \* \* \* \* \* \* \* \* \* \* \* \* \* \* \* \* \* \* \* \* \* \* \* \* \* \* \* \*

## Replicate 2

>PK\_329142-511\_17\_BS3\_C05.ab1/>ben1\_O\_Ex2\_BST  
NNNNNNNNNNNNNGNTGTGTTGANTGGTGGTGGAGATGGTGGTGTGTTGAGTTTGGTGGGAAGAATGGGTTAGAGGTTGTGA  
TGTTTGTATTTTTTTTTGTTGTTGGATTTTTTATATTTTTTGTGTTGTTTTTTTTTTATTTTTATATTTTTTGTATGTTT  
TTTGGTATTTAATTANGAANCNTATGGACTGGACCCNACCNCCTTCTCCGAANCNCNNTCCNCCNNTCTGNTGAAC  
CTACTTCTCTGCGCANCCACCTNATTAANCCNCCNNTCNATATGCCCTNACCNCCTNCAAANACTATANCCTCNG  
GGNGCCCCNGGTCCCTNTCCTNNTGCCNCCNCCACTTNTCCNCCNCCNCTACTNNAATATGCNCTNNTGGTATATT  
ACTAGNATATNACCNNNTATNNTGCNT

>PK\_329142-512\_18\_BS3\_D05.ab1/>ben1\_R\_Ex2\_BST  
NNNNNNNNNNNNNTGTGTTGANTGGTGGTGGAGATGGTGGTGTGTTGAGTTTGGTGGGAAGAATGGGTTAGAGGTTGTGATG  
TTTGTATTTTTTTTTGTTGTTGGATTTTTTATATTTTTTGTGTTGTTTTTTTTTTGTTTTTATATTTTTTGTATGTTTTT  
TGGTATTTAATAAATACCNNNNNTTAAAGGATGTTTTTGAACGGTCTNCTTCGGGTCGGGGTCCCGCCGCTGCTTNGTA  
AACGTAGTTNGTNNACCNCNCTCCCTNGNACCACGCCANATCNACNTGTTCCTNACTCTCCACCAAGNN

>PK\_329142-513\_19\_BS3\_E05.ab1/>ben1\_T\_Ex2\_BST  
NNNNNNNNNNNNNTGNTGTGTTGANTGGTGGTGGAGATGGTGGTGTGTTGAGTTTGGTGGGAAGAATGGGTTAGAGGTTGTGA  
TGTTTGTATTTTTTTTTGTTGTTGGATTTTTTATATTTTTTGTGTTGTTTTTTTTTTGTTTTTATATTTTTTGTATGTTT  
TTTTGGTATTTAATTAAATACCACCAATTTCCGANNNNNTTNNCNCNTCTTCTTCNGGGNGGNGCGANTGCTCTNCTTGT

GTGNTTTTTTTTTGAGTGCCACCCCTTTTAATACGACATCTCTTTNTGTATCGNANTCGTCTTCTTNTTGN

>PK\_329142-514\_20\_BS3\_F05.ab1/>ben1\_T\_Ex2\_BST

NNNNNNNNNGTTGTGTTGANTGGTGGTGGAGATGGTGGTGGTTTGGAGTTTGGTGGGAAGAATGGGTTAGAGGTTGTGATG  
TTTGTATTTTTTTTTGTTGTTGGATTTTTTATATTTTTGTTGTTGTTTTTTTTTGTTTTTATATTTTTTGTATGTTTTT  
TGGTATTTAATAANNCCNCCGCTACGTCCAGGAGCANNACNTCTNTCTCCGGACCACGGCGACTCCGCTACCTGCTCC  
GACGTGTTNTTCGAGGGCCACACCCTGTTGAACCGCNCNCGCTGAATGGTACCNACTTCNNNCATGACNGCNACATCCT  
GGGGCTAANNNTGGANTNNCCTACNACAGCCACAANNCTATATCCTGTTTCNATTCNNTGAAGAACAGCANCNCNGTGAA  
CTTCTNNATCCNCCNCCNCCNCCNCTAAGGTTCCNTCTNANNNNNNACCNCTTNCNCAACNCTCCCCTCGTNGACGG  
NCCCCTGNTGCTGCCCGCAACCCTATCTGANACCCCTNCCTCCCTGAGTTNTATTTTTANNATN

>PK\_329142-525\_17\_BS4\_C07.ab1/>ben1\_O\_Ex2\_BST

NNNNNNNNNNNNNNNNNNAANTATAANANATCCAACANNNAAAAAATAACAAACTTCCCATCCTCTAACCATTCTTC  
CCACCAGACTCAAACACCACCATCTCCACCACCATTTTCAACACAACATAAAAACTACTCACCTCTTCTCCTTTTAATT  
CCTAAAANGTNNNNCCGNCTGGNCGNNGGCGCATGNATATNNTGCGGGTGGNGCTGACCGTGCTGTNCTGNNTGANC  
GTTTNGTTGATCTGCNCCCTGGCCATGNGAANGGACCTTGTTNACTGTAACCNTGTNCTGCTGCNACAACCGNNNG  
GGACCCACNGTGTGTGAAATNGCTGGTGCATAGNGCCGGCTAAATGCACTNCTCGTTGGNNGACNACTCCCATGTTGGGC  
CCCAAGCCACCNTGCTTGATGACTTCTCNCCTGCTCGCCCTGCTGGTNGCTCTGTTTGNCTGCTGGTTGANTGNCCG  
GNCCNCCACCGTACCNACTTGGNACAAACAGACNGNATATGACGNANTCTCTTACANGCTCCATTNGTTNNGAATTGN  
GTCTTTNTCTNCTNTCTCTCAACCGTGTNTACTNCCATTGCTCGTGCNCGGCTCCTGCCACCTCGNGATGTCGGAC  
TNCNANAATAATGTANTTTANCNNTGCCTATTNATNTCTNTGCGNTAAACCNCCTGCTACGCCAGGTG

>PK\_329142-526\_18\_BS4\_D07.ab1/>ben1\_R\_Ex2\_BST

NNNNNNNNNNNANAANAATAATAAAAAATCCAACAACAAAAATAACAAACATCACAACCTCTAACCATTCTTCCC  
ACCAAACTCAAACACCACCATCTCCACCACCATTTTCAACACAACATAAAAACTACTCACCTCTTCTCCTTTTAATTCC  
TAAAANGTAAAGGGTGTGNNCTGCGCCGGCANGGCCATCCTNTGCGAGAGGCGGACCCTGTGCTGTTGAGTGAACGAAC  
TGNTGAGCTGCGCCCTGCCTNNTAGGNATGTGANCNCTTCNNNGCCAACNCCNNGNCTAGTNCATAACNNCATTNAG  
CCCCTGNGGATGAGCTNNGNGGGGGGAGCANCNCCCTATTANCACTANTCGTTAGATCANGACTCGNATGTGGTACGAG  
ATTACACCGCTGCTTGAGGGCTGCCCATGATCNGCGTCTGGAGGCCCTGCTNNATCGTTGNTGTACATANNAGGCCTCT  
CNTGCACCGGCTGCTGANAAGAAACAGGCTCCCTGGACAGGCTGGNACTAATGNCCAGGATCGTGTTCCTGATCAAATGG  
ATGTTTATCTGGCTCTCTCTGTGCTGTCTGCTCACTCCATTGCGCGNGCTTGGACNCCCCNTGNTGNNAGGNNGTNN  
NAAAGNAACTGNNNNCNANCCNTGCCTGNNCTGNTCCNGGGNCCNNTATGCTGCTGNTNNGNAGN

>PK\_329142-527\_19\_BS4\_E07.ab1/>ben1\_T\_Ex2\_BST

NNNNNNNNNNNNNNNNAATAATAAAAAATCCAACAACAAAAATAACAAACATCACAACCTCTAACCATTCTTCCC  
ACCAAACTCAAACACCACCATCTCCACCACCATTTTCAACACAACATAAAAACTACTCACCTCTTCTCCTTTTAATTCC  
TAAAANGGGTAGAGCGNCCATGATCTCNGCCGGCGGNGGATCCTGGGCGGGTGGGGACCCTGCGCGGCTGGGTGAACG  
GGCTGGGGTGTGCCCCCTGCCGNTGTGGTAGGTNACCGCCTTGTTGCTTAATTATCGGGGTGGATGNTNGGTGTGG  
GAAGGCCAGNGGATGAGNTGTGCGGTGCNCCGCNCCGNCAGAGTCTNCGANGGTGNGGACAGCAGCANNGGATGTGCC  
CTGGACGCGCAGGCCGAAGAGGACTGCGCGTGTATCACCNGCTGGTGGCCCTGTTTCNNTGATGGTGTNCAATGGCNGC  
NCTCATNTGCACCACCAGNGCGCAGGACAAAGACAGCCAGGCCAGGCTGGCGCTGACCACCGGCCTCGTGTTCGTGATCN  
NNGGGTGTGAACTGATCACGCTGAGCTGGGCGCCNCTCCATGATCACGTACTTCTNTATTGCCGTGTGGNNTANN  
GNAGNANNANNAAGNNGNNTGNTACACGTNNCTGTGCTGGTGCNCGGTCGTGAGTNTGCTNNGNNTGGTTGGNCNN  
NNGTTGNTTCGNNNTTNGCANNANGNNNNGCCANCANACNGGCNCCATCTACACGANANGTGCAGAGCCGCTNNN  
GANGNCCCANGNANNNGNNGGNTNNN

>PK\_329142-528\_20\_BS4\_F07.ab1/>ben1\_T\_Ex2\_BST

NNNNNNNNNCCNANNANNAATAATAAAAAATCCAACAACAAAAATAACAAACATCACAACCTCTAACCATTCTTCC  
CACCAAACTCAAACACCACCATCTCCACCACCATTTTCAACACAACATAAAAACTACTCACCTCTTCTCCTTTTAATTCC  
CTAAAANNNTGGCTGGGNTGATNTGGNNGGTGACGGAATGGTCTGCGCCGGCATGCCATCCTGGGCGTGGTGGTGANCT  
GCTGGGCTGGGCGAACCGCCTGGTGTGAGCTGCGCCTTGTCTATGTGGAATGTGACCTCCTTCNCTGCAACAACCTCNTGG  
TGGCCCAGGTGGTGTGGGAGGGCCTGTGGATGANCTGNGNGGTGCANANACCGGCGGATGCANTGTNNGNNTAGGACC  
CTCTGCTGGNCTGCCNAGGACCTGNANGANCAACAGCCCTGTGGNTGATCNCCTGCTGGTGGNCCTGTTCGGCCTGN  
TGGTGTACCTGGACGGCGCTAGGTGCAACAANTGCGTGCAGGATAACGATATCCACGNCAANCTGGTGGCNACTGGCGCN  
NTCCTGTTTCGTGATCACGGCGAGCTGACCCNCTCNCNGTGNCTNGAGCNCNCAACNCTGCCNTCTGGGAGTCTGNNC  
ANGCTGNNGGTGNAGNCNACACCNANGCANNNTNGCTGNNGNNTGTACTTGNNGNCACTCNANCGNNN
