# Supplementary material for: The ben1-1 Brassinosteroid-Catabolism Mutation Is Unstable Due to Epigenetic Modifications of the Intronic T-DNA Insertion
Source: PubMed Central journal article supplement (PMC3755919; doi:10.1534/g3.113.006353), 2013-09-01
Supplement: supp_g3.113.006353_FileS2.pdf [file supp_g3.113.006353_FileS2.pdf]

Bisulfite sequences of the *BEN1* promoter

ccattccatctcattcacgcgttttattttctctcattcatattaattatatattaatcacacaatcctaataatatcccttaatctatgcct  
 agaacatgcatggtattataattaatacattcgacaccactagaagccaaaagtatatagtagtaaaaaaaaaagaagaagaagctggtttgtagct  
 aagaatgaaaataacggaatccaataacaatggttgtaataaacggacaaagaatgtgaattattcacataaatgatctgtaaaatgtgagca  
 tttgattataacggatataataaaacaaaaattgtaataaaagagagaagagggcaaacggggaacatgtcacgcggataggtgtgagagagt  
 aatgacgtaggttccggttatttaagaacccttctagagaggttcccacacaccagaagagagagaaagagacagagagaaaATGGTGAGAGA  
[AGAACAAGAAGAAGATGACAACAACAACAAC](#)

**Primers:**

pBEN1-BS-Fv: 5'-GTATAGTAGTAAAAAAAAGAAGAAGAAG-3'

pBEN1-BS-Rv: 5'-CTTRTTCTTCTCTCACCATTTTCTCTCT-3'

(RC=reverse compliment)

**Replicate 1**

>PK\_328409-528\_5-R\_Primer-D\_A02.ab1/>Col-0\_no\_BST  
 NNNNNNNNNNNCTCTTCTGGTGTGTGGGACCTCTCTAGAAGGGTTCTTAAATAACGGAACCTACGTCATTTACTCTCTCA  
 CACCTATCCGCGTGACATGTTCCCGTTTTGCCCTCTTCTCTCTTTATTACAATTTTTGTTTTATTATATCCGTTATAAT  
 CAAATGCTCACATTTTACAGATCATTATGTGAATAATTCACATTCTTTGTCGTTTTATTACAAACATTTGTTATTGGATT  
 CCGTTATTTTCATTCTTACGTACAAACCAGCTTCTTCTTTTTTTTTACTACTATAN

>RC\_328409-528\_5-R\_Primer-D\_A02.ab1/>Col-0\_no\_BST  
 NTATAGTAGTAAAAAAAAGAAGAAGAAGCTGGTTTTGTACGTAAGAATGAAAATAACGGAATCCAATAACAATGTTTGTAAATAAAC  
 GGACAAAGAATGTGAATTATTACATAAATGATCTGTAAAATGTGAGCATTGATTATAACGGATATAATAAAACAAAAATTGTA  
 ATAAAGAGAGAAGAGGGCAAAACGGGGAACATGTCACGCGGATAGGTGTGAGAGAGTAAATGACGTAGGTTCCGTTATTTAAGAA  
 CCCTTCTAGAGAGGTCCACACACCAGAAGAG

>PK\_328409-529\_6-F\_Primer-C\_B02.ab1/>Col-0\_BST  
 NNNNNNNNNNGTAGATGANATAAATGGAATTTAATAATAATGTTTGTAAATAAATGGATAAAGAATGTGAATTATTTATATA  
 AATGATTTGTAAAATGTGAGTATTTGATTATAATGGATATAATAAAATAAAAATTGTAATAAAGAGAGAAGAGGGTAAAA  
 TGGGGAATATGTTATGTGGATAGGTGTGAGAGAGTAAATGATGTAGGTTTTGTTATTTAAGAATTTTTTTAGAGAGGTTT  
 TTATATATTAGAAGAGAGAGAAAGAGATAGAGAGAAAATGGTGTGAGAGAAGAACAAGACNNCCTNCNNCCTTCCCTCCCC  
 CCACCTATCCACATAACCATTTTCCCCCTTTCACCCCTTCTCTCTTTATNCAAATCTTTTTTGCTCATCNCNNACNAAT  
 CAAATACCCCATTTTTCACATCNNTCTTCTAAATAATTCCATTCTTTATCCATTTTCCCTCACATTAGGCTAATTCCTC  
 ACTNTTTTCTTTCCTTATACAAACNNCTTCTTCTTCTTTTNGGGTACNCNANACCAGCTNNTGCTNCCTTTAGTNNN

>PK\_328409-530\_6-R\_Primer-D\_C02.ab1/>Col-0\_BST  
 NNNNNNNNNNNCTTCNATATATAAAAAACCTCTCTAAAAAAATTCTTAAATAACAAAACCTACATCATTACTCTCTCACAC  
 CTATCCACATAACATATTCCCCATTTTACCCTCTTCTCTCTTTATTACAATTTTTATTATATCCATTATAATCAA  
 ATACTCACATTTTACAAATCATTATATAAATAATTCACATTCTTTATCCATTTTATACAAACATTATTTAAATTCCA  
 TTATTTTCATTCTTACATAACAACTTCTTCTTCTTTTTTTTTACTACTATAN

>PK\_328409-531\_7-F\_Primer-C\_D02.ab1/>ben1\_O\_pBEN1\_BST  
 NNNNNNNNNNNNGTNNATGANATAANGGAATTTAATAATAATGTTTGTAAATAAATGGATAAAGAATGTGAATTATTTAT  
 ATAAATGATTTGTAAAATGTGAGTATTTGATTATAATGGATATAATAAAATAAAAATTGTAATAAAGAGAGAAGAGGGTA  
 AAATGGGGAATATGTTATGTGGATAGGTGTGAGAGAGTAAATGATGTAGGTTTTGTTATTTAAGAATTTTTTTNNAGAGG  
 TTCTTATATATTAGACNACAGAGCAAGAG

>PK\_328409-532\_7-R\_Primer-D\_E02.ab1/>ben1\_O\_pBEN1\_BST  
 NNNNNNNNNNNNNCNCNCTATATATAAAAAACCTCTCTAAAAAAATTCTTAAATAACAAAACCTACATCATTACTCTCTC

ACACCTATCCACATAACATATTCCCCATTTTACCCTCTTCTCTCTTTATTACAATTTTTATTTTATTATATCCATTATAA  
TCAAATACTCACATTTTACAAATCATTTATATAAATAAATTCACATTCTTTATCCATTTATTACAAACATTATTATTAAT  
TCCATTATTTTCATTCTTACATACAAACCAACTTCTTCTTCTTTTTTTTACTACTATACANN

>PK\_328409-533\_8-F\_Primer-C\_F02.ab1/>ben1\_R\_pBEN1\_BST  
NNNNNTNNGNNTGTANGATGANNTAATGGAATTTAATAATAATGTTTGTAAATAAATGGATAAAGAATGTGAATTATTTAT  
ATAAATGATTTGTAATAATGTGAGTATTTGATTATAATGGATATAATAAAAATAAAAATTGTAATAAAGAGAGAAGAGGGTA  
AAATGGGGAATATGTTATGTGGATAGGTGTGAGAGAGTAAATGATGTAGGTTTTGTTATTTAAGAATTTTTTTAGAGAGG  
TTTTTATATATTAGAAGAGAGAGAAAGAGATAGAGAGAAAATGGTGAGAGAAGAACAAGAANANANACATNTTTACTCTC  
TCACACCTATCCACATAANTATTCCCATTTTACCCTCTTCTCTCTTTATTAAATTTTTTATTNNN

>PK\_328409-534\_8-R\_Primer-D\_G02.ab1/>ben1\_O\_pBEN1\_BST  
NNNNNNNNNNNCTTCNATATATAAAAACTCTCTAAAAAAATTTCTTAAATAACAAAACCTACATCATTTACTCTCTCACA  
CCTATCCACATAACATATTCCCCATTTTACCCTCTTCTCTCTTTATTACAATTTTTTATTTTATTATATCCATTATAATCA  
AATACTCACATTTTACAAATCATTTATATAAATAATTCACATTCTTTATCCATTTATTACAAACATTATTATTAATTC  
ATTATTTTCATTCTTACATACAAACCAACTTCTTCTTCTTTTTTTTACTACTATAN

>PK\_328409-535\_9-F\_Primer-C\_H02.ab1/>ben1\_T\_pBEN1\_BST  
NNNNNNNNNNGTAGATGANATAATGGAATTTAATAATAATGTTTGTAAATAAATGGATAAAGAATGTGAATTATTTATATA  
AATGATTTGTAATAATGTGAGTATTTGATTATAATGGATATAATAAAAATAAAAATTGTAATAAAGAGAGAAGAGGGTAAAA  
TGGGGAATATGTTATGTGGATAGGTGTGAGAGAGTAAATGATGTAGGTTTTGTTATTTAAGAATTTTTTTAGAGAGGTTT  
TTATATATTAGAAGAGAGAGAAAGAGATAGAGAGAAAATGGTGAGAGAAGAACAAGAAAACCTACATCATTTACTCTCTC  
ACACCTATCCACATAACATATTCCCCATTTTACCCTCTTCTCTCTTTANNNANNTTTTTATTTTATTATATCCATTANAAT  
CAATACTCCATTTTCAAATCATTNATATAAATAATTCNNTTNNNCNNGTTCANACATTNTTNTNNNT

>PK\_328409-536\_9-R\_Primer-D\_A03.ab1/>ben1\_T\_pBEN1\_BST  
NNNNNNNNNNNNNNNTCTNNNNNNNTATAAAAACTCTCTAAAAAAATTTCTTAAATAACAAAACCTACATCATTTACTCTC  
TCACACCTATCCACATAACATATTCCCCATTTTACCCTCTTCTCTCTTTATTACAATTTTTTATTTTATTATATCCATTAT  
AATCAAATACTCACATTTTACAAATCATTTATATAAATAAATTCACATTCTTTATCCATTTATTACAAACATTATTATTA  
ATTCCATTATTTTCATTCTTACATACAAACCAACTTCTTCTTCTTTTTTTTACTACTATAACCANNNGNNGGCCGTGGNN  
NGAGCGTNCGGCCTTTTTGNTGTTGCGTNCGGTCTGTTTTTTGTAACAACAATNGCGCCTANGCCATCTTCNATTTTCGG  
NGNCCTTANCTTGCCACGNCCCAGAGCNCNCAGTAGCCGCCGNATCCNCCNNAANNGGGNAGTCCACCANNAGATG  
AAGCTGATCGTTTCCCNACCCCNACGGGGGCGCNGTNCNCCAACTTTTGTTCCTGTTTNNAGAGAGCNCANNNTANNA  
TTGAGACTGNNNGGCTGGCTGGTTCCCGTNNAGATTNTAAACCGCACACTGTTCCCNATATCTCANGACCGGNAGNA  
TATGNNTNAGCCGNCGNANNNNATNNNTANNTAANTGNCTAGNTTNTGCGGTTANTNCCACTTTCNNACNNGAGTC  
CTNNNNNCNNTCNCATTTTCTAACNTCTANCAATGNAGCNGTNTTGNAAACCTAAT

**Sequence alignment:**

ben1\_O\_pBEN1\_BST GGAATTTAATAATAATGTTTGTAAATAAATGGATAAAGAATGTGAATTATTTATATAAATG  
ben1\_T\_pBEN1\_BST GGAATTTAATAATAATGTTTGTAAATAAATGGATAAAGAATGTGAATTATTTATATAAATG  
Col-0\_BST GGAATTTAATAATAATGTTTGTAAATAAATGGATAAAGAATGTGAATTATTTATATAAATG  
Col-0\_no\_BST GGAATCCAATAACAATGTTTGTAAATAACGGACAAAGAATGTGAATTATTCACATAAATG  
\*\*\*\*\* \*\*\*\*\*

ben1\_O\_pBEN1\_BST ATTTGTAAAATGTGAGTATTTGATTATAATGGATATAATAAAAATAAAAATTGTAATAAAG  
ben1\_T\_pBEN1\_BST ATTTGTAAAATGTGAGTATTTGATTATAATGGATATAATAAAAATAAAAATTGTAATAAAG  
Col-0\_BST ATTTGTAAAATGTGAGTATTTGATTATAATGGATATAATAAAAATAAAAATTGTAATAAAG  
Col-0\_no\_BST ATCTGTAAAATGTGAGCATTGATTATAACGGATATAATAAAAACAAAATTGTAATAAAG  
\*\* \*\*\*\*\*

ben1\_O\_pBEN1\_BST AGAGAAGAGGGTAAAAATGGGGAATATGTTATGTGGATAGGTGTGAGAGAGTAAATGATGT  
ben1\_T\_pBEN1\_BST AGAGAAGAGGGTAAAAATGGGGAATATGTTATGTGGATAGGTGTGAGAGAGTAAATGATGT  
Col-0\_BST AGAGAAGAGGGTAAAAATGGGGAATATGTTATGTGGATAGGTGTGAGAGAGTAAATGATGT  
Col-0\_no\_BST AGAGAAGAGGGCAAAACGGGGAACATGTCACGCGGATAGGTGTGAGAGAGTAAATGACGT  
\*\*\*\*\* \*\*\*\*\*

ben1\_O\_pBEN1\_BST AGGTTTTGTTATTTAAGAATTTTTTTAGAGAGGTTTTTATATAT-AGNNG-----  
ben1\_T\_pBEN1\_BST AGGTTTTGTTATTTAAGAATTTTTTTAGAGAGGTTTTTATATATTAGAAGAGAGAGAAAG  
Col-0\_BST AGGTTTTGTTATTTAAGAATTTTTTTAGAGAGGTTTTTATATATTAGAAGAGAGAGAAAG  
Col-0\_no\_BST AGGTTCCGTTATTTAAGAACCCTTCTAGAGAGGTCCC-ACACACCAGAAGAG-----  
\*\*\*\*\* \*\*\*\*\* \*\* \*\*\*\*\* \* \* \* \* \*

ben1\_O\_pBEN1\_BST -----  
ben1\_T\_pBEN1\_BST AGATAGAGAGAAAATGGTG  
Col-0\_BST AGATAGAGAGAAAATGGTG  
Col-0\_no\_BST -----

## Replicate 2

>PK\_329142-503\_7\_pBEN1-Fv\_C04.ab1/>ben1\_O\_pBEN1\_BST  
NNNNNNNNNNNNNNNNNNATGANATAATGGAATTTAATAATAATGTTTGTAAATAAATGGATAAAGAATGTGAATTATTTAT  
ATAAATGATTTGTAAAATGTGAGTATTTGATTATAATGGATATAATAAAAATAAAAATTGTAATAAAGAGAGAAGAGGGTA  
AAATGGGGAATATGTTATGTGGATAGGTGTGAGAGACTAAATGATGTAAGTTTTGTNANTCCTNCNTTTTGTCCNCCCC  
CTCTCCCCCTCTNACCCCNCCNCNCCNCTACAGAGGNCNCCNCTACCNCNNCCCGACCNTCCNCCCCAGTACCN  
GTCNNATCCCCTNGACAANNCCCCTCCCCNACGCCCTCCGGACCNNCCCTCCNNNNCTCNCCTCANNANANCCATGCT  
NCNCTCTNNNTGTCNCCNCCCCNCCGAGCCACCCTCCTCCACCNCGCCCCCCCGCCCCCCCCCTCTGCCNCTTT  
CCCATCGCENNANTGCCTGATGCCACATCCNTCTNNGCCACCCTCCAACCTCGCCGCGTCGTGCTCAACCNCNCTCNC  
CNCACCCCTCTCTCNGCCNCCCTCCACCCCNCTCCCTNNCCAANN

>PK\_329142-504\_8\_pBEN1-Fv\_D04.ab1/>ben1\_R\_pBEN1\_BST  
NNNNNNNNNNNNNGTAGATGANATAATGGAATTTAATAATAATGTTTGTAAATAAATGGATAAAGAATGTGAATTATTTATA  
TAAATGATTTGTAAAATGTGAGTATTTGATTATAATGGATATAATAAAAATAAAAATTGTAATAAAGAGAGAAGAGGGTAA  
AATGGGGAATATGTTATGTGGATAGGTGTGAGAGAGTAAATGATGTAGGTTTTGTTATTTAAGAATTTTTTTAGAGAGGT  
TTTTATATATTAGAAGAGAGAGAAAGAGATAGAGAGAAAATGGTGAGAGAAGAACAAGANNCCCCCTNANNCCCGTCGG  
GTCTCCTTANCNATAACCACCTCNCGATGCCCNCGCGCCNTGANCNNGTCNNCTCTCNGAGNGGCNTGCNCCNCCN  
GCCCCNNTTGNNGCCNNNACTCCGAGCNNNNNCGCCNCCCCCGCCCCCNCCCCACCCTCTGCCTCGNATCTGAC  
TCCTGANTGCCGGTGGCCAACCTCCNCGAATGACNCCCTCCGACNCGGCGCGTCGTGCTCGCCNCCACTCNCNCCCC  
CCGACACCNCNCTGGGNTCCGNCNCCCCCTGCCNCCN

>PK\_329142-517\_7\_pBEN1-Rv\_C06.ab1/>ben1\_O\_pBEN1\_BST  
NNNNNNNNNNNNNNNNNNNAAAACCTCTCTAAAAAATTTCTTAAATAACAAAACCTACATCATTTACTCTCTCACACC  
TATCCACATAACATATCCCCATTTTACCCTCTTCTCTTTTATTACAATTTTTATTTTATTATATCCATTATAATCAA  
TACTCACATTTTACAAATCATTTATATAAATAGGTACATTTCTTTATCCATTTATTACAAACATTATTTAAATTCAT  
TATTTTCATTTTACATACAAACCAACTTCTTCTTTTTTTTACTACTATACAGGNGCNGNNGGTGGTCNTGTAGGGN  
CGGGGTGGCTGNCTGNNGCNGNTNGNNNGGTGCGTACATTTACTAGGNNCCTANNNNGCGAGNCGCTGGCNGCGTAG  
TCCTGNAGCGGCGGCGCCGNGACCGCTGGTGGGCGCGNCCCTCGAGGGGGNTGTANANGGCCNANGATGANNGNN  
CGGNCGNGCNGCNGGATCAGGNTAACNNGCCNNTGATCANGNNGGGATGNCNNGGCCATCGCGNTN

>PK\_329142-518\_8\_pBEN1-Rv\_D06.ab1/>ben1\_R\_pBEN1\_BST  
NNGNGNNGNNNNNNNNNANGNNNNNNNNNTGCTNNAAAAAGGCTTAAATAACAAAACCTACATNATTTGNTCTCTNNNN  
CCTATCCACATAACATATCCCCATTTTACCCTCTTCTCTTTTATTACAATTTTTATTTTATTATATCCATTATAATCA  
AATGCTCACATTTTACAGATCATTTATATAGATAGTTNACATTTCTTTATCCATTTATTACAAACATTATTTAAATTC  
ATTATTTTCATTTTACATACAAACCAACTTCTTCTTTTTTTTACTACTATACN
