# Supplementary material for: The ben1-1 Brassinosteroid-Catabolism Mutation Is Unstable Due to Epigenetic Modifications of the Intronic T-DNA Insertion
Source: PubMed Central journal article supplement (PMC3755919; doi:10.1534/g3.113.006353), 2013-09-01
Supplement: supp_g3.113.006353_FileS3.pdf [file supp_g3.113.006353_FileS3.pdf]

## Bisulfite pNOS raw sequences

GTTTACCCGCCAATATATCTGTCAAACTGATAGTTTAAACTGAAGGCGGGAAACGACAATCTGATCATGAGCGGAGAATTAAGGGAGTCACGT  
 TATGACCCCGCCGATGACGCGGGACAAGCCGTTTTACGTTTGAAGTACAGAACCGCAACGTTGAAGGAGCCACTCAGCCGCGGGTTTCTGGA  
 GTTTAATGAGCTAAGCACATACGTGAGAAACCATTATTGCGCGTTCAAAGTGCCTAAGTCACTATCAGCTAGCAAATATTTCTGTCAAAAATG  
 CTCCACTGACGTTCCATAAATCCCTCGGTATCCAATTAGAGTCTCATATTTACTCTCAATCCAAATAATCTGCACCGGATCTGGATCGTTTCGATG  
 ATTGAACAAGATGGATTGCACGCAGGTTCTCCGGCCGCTTGGGTGGAGAGGCTATTCCGGCTATGACTGGGCACAACAGACAATCGGCTGCTCTGA  
 TGCCGCCGTGTTCCGGCTGTGACGCGAGGGGCGCCCGGTTCTTTTGTCAAGACCGACCTGTCCGGTGCCCTGAATGAACTGCAGGACGAGGCAG  
 CGCGGCTATCGTGGCTGGCCACGACGGGCGTTCTTGCAGCAGCTGTGCTCGACGTTGTCACTGAAGCGGGAAGGGACTGGCTGCTATTGGGCGAA  
 GTGCCGGGGCAGGATCTCTGTCATCTCACCTGCTCCTGCCGAGAAAGTATCCATCATGGCTGATGCAATGCGGCGGCTGCATACGCTTGATCCG  
 GCTACCTGCCATTGACCACCAAGCGAAACATCGCATCGAGCGAGCACGTACTCGGATGGAAGCCGGTCTTGTGATCAGGATGATCTGGACGA  
 AGAGCATCAGGGGCTCGCGCCAGCCGAAGTTCGCCAGGCTCAAGGCGCGCATGCCCGACGGCGATGATCTCGTCGTGACCCATGGCGATGCTT  
 GCTTGCCGAATATCATGGTGGAAAATGGCCGTTTTCTGGATTTCGACTGTGGCCGGCTGGGTGTGGCGGACCGCTATCAGGACATAGCGTTG  
 GCTACCCGTGATATTGCTGAAGAGCTTGGCGGCGAATGGGCTGACCGCTTCTCGTGCTTTACGGTATCGCCGCTCCCGATTGCGAGCGCATCGCCT  
 TCTATCGCCTTCTTGACGAGTTCTTCTGA

**Primers:**

pNOS-BS-F (Primer A/<sub>pROK2-Fv</sub>): 5'-GGGTTTTYTGGAGTTTAATGAGYTAAG-3'

pNOS-BS-R (Primer B/<sub>pROK2-Rv</sub>): 5'-CACTTCRCCCAATARCARTCCCTTCC-3'

**Replicate 1**

>PK\_328409-501\_1-F\_Primer-A\_A01.ab1/>*ben1\_o\_pNOS\_no\_BST*

CNNNNNNNNNNNANATTATTGCGCGTTCCNNNGTCGCCTAAGGTCACTATCAGCTAGCAAATATTTCTGTCAAAAATGCT  
 CCACTGACGTTCCATAAATCCCTCGGTATCCAATTAGAGTCTCATATTTACTCTCAATCCAAATAATCTGCACCGGAT  
 CTGGATCGTTTCGCATGATTGAACAAGATGGATTGCACGCAGGTTCTCCGGCCGCTTGGGTGGAGAGGCTATTCCGGCTAT  
 GACTGGGCACAACAGACAATCGGCTGCTCTGATGCCGCCGTGTTCCGGCTGTGACGCGAGGGGCGCCCGGTTCTTTTGT  
 CAAGACCGACCTGTCCGGTGCCCTGAATGAACTGCAGGACGAGGCAGCGCGGCTATCGTGGCTGGCCACGACGGGCGTTC  
 CTTGCGCAGCTGTGCTCGACGTTGCTCACTGAAGCGGGAAGGGACTGGCTGCTATTGGGCGAAGTGAACNCNTCAAGCACA  
 GCTGCGCAGGNNNNNCGTCNTGGCCAGCCNNATAGCCCCGCTNCTTCTCCTGNNNTTNTTAAGGNNCCGGNANNGGNN  
 NCTTGANAAAAAAGAACCGGGGCCCCNNGNNNNAAANCCGAAACCGGGCGCNNNNAAACCCNNNNNNNTTGTNNNNGCC  
 NNANAAANCNNAAANGCCTCCCCCNCNGGNNNNNANCNTGNTNNNTNNNTTNTTTCGNNNNNNNNNCNNATNNNAN  
 NNNNTN

>PK\_328409-502\_1-R\_Primer-B\_B01.ab1

NNNNNNNNNNNNNNNNGTCGAGCACAGCTGCGCAGGAACGCCGTCGTGGCCAGCCACGATAGCCGCGCTGCCTCGTCC  
 TGCAATTATTAGGGCACCGGACAGGTCGGTCTTGACAAAAAGAACCAGGGCGCCCTGCGCTGACAGCCGGAACACGGC  
 GGCATCAGAGCAGCCGATTGTCTGTTGTGCCAGTCATAGCCGAATAGCCTCTCCACCCAAGCGCCGGAGAACCTGCGT  
 GCAATCCATCTTGTTCATCATGCGAAACGATCCAGATCCGGTGCAGATTATTTGGATTGAGAGTGAATATGAGACTCTA  
 ATTGGATACCGAGGGGAATTTATGGAACGTCAGTGGAGCATTGTTGACAAGAAATATTTGCTAGCTGATAGTGACCTTAG  
 GCGACTTTTGAACGCGCAATAATGGTTTCTGACGTATGTGCTTAACTCATAAACTCCAAAAACNNNN

>RC\_328409-502\_1-R\_Primer-B\_B01.ab1/>*ben1\_o\_pNOS\_no-BST*

NNNNGTTTTTGGAGTTTAATGAGTTAAGCACATACGTGAGAAACCATTATTGCGCGTTCAAAGTGCCTAAGGTCACTATCAGCTA  
 GCAAATATTTCTGTCAAAAATGCTCCACTGACGTTCCATAAATCCCTCGGTATCCAATTAGAGTCTCATATTTACTCTCAATCCAA

TAATCTGCACCGGATCTGGATCGTTTCGCATGATTGAACAAGATGGATTGCACGCAGGTTCTCCGGCCGCTTGGGTGGAGAGGCTAT  
TCGGCTATGACTGGGCACAACAGACAATCGGCTGCTCTGATGCCGCCGTGTTCCGGCTGTCAGCGCAGGGGCGCCCGTTCTTTTTG  
TCAAGACCGACCTGTCCGGTGCCTGAATGAAGTGCAGGACGAGGCAGCGCGCTATCGTGGCTGGCCACGACGGGCGTTCTCTGCG  
CAGCTGTGCTCGACNNNNNNNNNNNNNNNNNN

>PK\_328409-503\_2-F\_Primer-A\_C01.ab1/>*ben1\_o\_pNOS\_BST*

CNNNNNNNNANANNTTATTGCNTGTTCCNNNTTGCCTAAGNTCACTATCANCTAGCAAATATTTCTGTCAAAAATGCTCC  
ACTGATGTTCCATAAATCCCTTGGTATCCAATTAGAGTCTCATATCACTCTCAATCCAAATAATCTGCACTGGATCT  
GGATTGTTTTGCATGATTGAACAAGATGGATTGCATGCAGGTTCTTTGGTTGTTTGGGTGGAGAGGTTATTTGGTTATGA  
NTGGGCACAACANATAATTGGCTGCTCTGATGTCGTTGTGTTTNGGTTGTCANNGCANGGNTGCTTGGTTCTTTTTGTCA  
AGATTGACCTGTCTGGNGCCTGAATGAAGTGCAGGATGAGGCANNGTGGCTATTGTGGCTGGNCATGATGGGTGTTCTT  
TGCGCANCTGTGCTNGATGTTGCTACTGAANTGNGAAGGGACTGGCTGCTATTGGGCGAAGTGA

>PK\_328409-504\_2-R\_Primer-B\_D01.ab1

CNNNNNNNNNNNNNNNTCNANCNCNNCTACNCAAAANACACCCATCATANCCAACCACAATAACCACACTACCTCATCCT  
ACAATTCATTCAAAACACCAAAACAAATCAATCTTAACAAAAAAAACCAAACACCCCTACACTAACAAACCAAAACACAACA  
ACATCAAAACAACCAATTATCTATTATGCCAATCATAACCAATAACCTCTCCACCCAAACAACCCAAAAAANTGCGNT  
GCAANCCATCTTTGNNCNCATCATGCAAAAAAACCAANCCNGGGGAAATNTTTGGATNGNAGNGGNANATGANNNNC  
TAATTGGATACCAAGGGGAATTTNTGGNANNTCANGGGNNNTTTTTGANNAGAAATATTTGNTAGCNGNNNNGGGNCTT  
ANGGNANTTTTGNANACNCAAAANNNNTTCNGANNATGGGGNNNACTCNNTAAACNCCAAAAAACCCAN

>RC\_328409-504\_2-R\_Primer-B\_D01.ab1/>*ben1\_o\_pNOS-BST*

NTGGGTTTTTTGGNGTTTANNGAGTNNCCCCATNNNTCNGAANNNNNTTTGNGTNTNCAAAANTNCCNTAAGNCCNNNNCN  
GCTANCAAATATTTCTNNTCAAAANNNNCCNTGANNTNCCANAAATCCCTTGGTATCCAATTAGNNNTCATNTNCCNCTNN  
CNATCCAAANAATTTCCCNCGNTTTGGGTTTTTTGCATGATNGNCAAGATGGNTTGCANCGCANTTTTTTGGGTTGTTGGGT  
GGAGAGGTTATTTGGTTATGATTGGGCATAATAGATAATTGGTTGTTTGGATGTTGTTGTTTGGTTGTTAGTGTAGGGGTGTTT  
GTTTTTTTTGTTAAGATTGATTTGTTTGGTGTGTTTGAATGAATTGTAGGATGAGGTAGTGTGGTTATTGTGGTTGGNTATGATGGGTG  
TNTTTTGNGTAGNNGNGNTNGANNNNNNNNNNNNNNNG

>PK\_328409-505\_3-F\_Primer-A\_E01.ab1/>*ben1\_R\_pNOS\_BST*

NNNNNNNNNNATTNTTATTNCGCGTTCAAAGTCGTCTAAGGTTACTATCAGTTAGNAAATATTTTTGTCAAAAATGTTT  
TACTGACGTTCCATAAATTTTCTCGGTATTCAATTAGAGTCTCATATTTATTCTCAATTCAAATAATCTGTACCGGATC  
TGGATCGTTTCGTATGATTGAACAAGATGGATTGTACGCANGTTTTCCGGTCGTTTGGGTGGAGAGGCTATTCGGCTATG  
ACTGGGTACAACAGACAATCGGCTGTTCTGATGCCGCCGTGTTCCGGCTGTCAGTGCANGGGTGTCCGGTTTTTTTTGT  
AAGACCNATCTGTCCGGTGTCTGAATGAAGTGCANGACGAGGTANCGCGCTATCGTGGCTGGTTACGANGGGNGTTTT  
TTGCNTANCTGTGTTGATGTTGTTACTGAAGCGGGAANGGACTGGCTGCTATTGGGCGAAGTGAN

>PK\_328409-506\_3-R\_Primer-B\_F01.ab1

NNNNNNNNNNNNNNCGANNACGCTANCGCAANAACAGCCNGTCNGNACACCACGATAGCGCGCTANCNCGTCTCTNGNAG  
TTCATTACAGACACCGGACAGATCGGTCTTGACAANANNACCGGACACCCCTGCACTGACAGCCGNAACACGGCGGCATCA  
GAACAGCCGATTGTCTGTTGTACCCAGTCATAGCNNNATANCTCTCCACCCAANNNNNNNGAAAACCTGCGTACAATCC  
ATCTTGTTCATCATACGAAACGATCCAGATCCGGTACAGATTATTTGAATTGAGANTGAATATGAGACTCTAATTGAAT  
ACCGAGAAAAATTTATGNAACGTCANTNNACCATTTTTGACAAAAAATATTTGCTANCTGATAGTAACCTTAGACGACTT  
TTGAACGCGCAATAATANTTTCTGACGTATGTACTTNTCATTAAACTCCAAAAANNNNNNNN

>RC\_328409-506\_3-R\_Primer-B\_F01.ab1/>*ben1\_R\_pNOS-BST*



```

ben1_O_pNOS_no-BST  TATGACTGGGACAACAGACAATCGGCTGTCTCTGATGCCGCCGTGTTTC
ben1_R_pNOS_BST    TATGACTGGGTACAACAGACAATCGGCTGTTCTGATGCCGCCGTGTTTC
ben1_O_pNOS_BST    TATGANTGGGCACAACANATAAATTGGCTGCTCTGATGTCGTTGTGTTT
*****  ****  *****  *  ***  *****  *****  **  *****

```

## Replicate 2

```

>PK_329142-501_2_pROK2-Fv_A04.ab1/>ben1_O_pNOS-BST
CCNNNNNNANANNTTATTGCGTGTTCNNNTTGCCTAAGGTCACTATCAGCTAGCAAATATTTCTTGTCAAAAATGCTCCA
CTGATGTTCCATAAAATCCCCTTGGTATCCAATTAGAGTCTCATATTTCACTCTCAATCCAAATAATCTGCACTGGATCTG
GATTGTTTTGCATGATTGAACAAGATGGATTGCATGCAGGTTCTTTGGTTGTTTGGGTGGAGAGGTTATTTGGTTATGAT
TGGGTATAATAGATAAATTGGTTGCTCTGATGTTGTTGTGTTTTGGTTGTCAGTGCAGGGGTGTTTGGTTCTTTTTGTCAA
GATTGATCTGTCTGGTGTCTGAATGAACTGCAGGATGAGGCAGTGTGGCTATTGTGGCTGGTCATGATGGGTGTTCCCTT
GCGCAGCTGTGCTTGATGTTGTCAGTGAAGCGGAAGGGACTGGCTGCTATTGGGGCGAANNTGANCTCCNCNAGACTGN
CCNANNNNNNCNNCCTCCCNCTTTTNCCTTGTGANCNNNNANCCANCNTNNCNNNNNNNNCTNNNCTTCACTCNCNCCNNCT
CNNNCTTTGGTCTTCCCTCNCNCCNCTGCTCTCTCCCTCCCN

```

```

>PK_329142-502_3_pROK2-Fv_B04.ab1/>ben1_R_pNOS-BST
NNNNNNNNNNNNNTTATTGCGCGTTCAAAGTCGTCTAAGGTTACTATCAGTTANCAAATATTTTTTGTCAAAAATGTTNT
ACTGACGTTCCATAAAATTTTTCTCGGTATTCAATTAGAGTCTCATATTTATTCTCAATTCAAATAATCTGTACCGGATCT
GGATCGTTTCGTATGATTGAACAAGATGGATTGTACGCAGGTTTTCCGGTCGTTTGGGTGGAGAGGCTATTCGGCTATGA
CTGGGTACAACAGACAATCGGCTGTTCTGATGCCGCCGTGTTCCGGCTGTCAGTGCAGGGGTGTTCCGGTTTTTTTTGTCA
NNANCGATCTGTCCGGTGTCTGAATGAACTGCAGGACGAGGCANCGCGGCTATCGTGGCTGGTTACGATGGGTGTTTTT
TGCGTANCTGTGTTTCGATGTTGTTACTGAANCGGGAAGGGACTGGCTGCTATTGGGGCGAANTGANACNNCCAGNGNCCA
CACNCCTTNTTGCNCCNCCNNNTCTNNCANNATGACACCCAACANCCNCCNCGNNTANNATCNCNCCNCTNNNCTC
CCGCNNACTCNTGCATAGNNGTCNNNNNNNTCCTGACTGCN

```

```

>PK_329142-515_2_pROK2-Rv_A06.ab1/>ben1_O_pNOS-BST
NNNNNNNNNNANNNNNNNNNNNNNNNNNNNNNNNCTACNCAAAGACACCCATCATAACCNACCACAATAACCACACTACCTCATCCTA
CAATTCATTCAAACACCAAACAATCAATCTTAACAAAAAACCACAAACCCCTACGCTAACAAACCAAAACACAACAA
CATCAAACAACCAATTATCTATTATACCCAATCGTAACCAAATAACCTCTCCACCAACAACCAANANAANNNNNGGN
NNNNCNNNTNNNANATAGNAAAAAGNNTNNAANCNGGGNANTATTTGGANNGAGAGNGGNATGAGANNNTNNNTGGNNN
CCAGGGGAAATTTTGGGACNTTCCAGGGGAGCTTTTTGGACAGAAATATTTGGTAACCTGGNNANGGNCCTAAGGCAATTTT
GGACACNNAATAAAGTTTTNCGNNGNANGGGGCTNACCCCTTAAACCNANAAACCAANNAGGNTGCGGGAGNNGNNGN
GCACCAGNNGCTCGNTGAGAAAANGCNNNNGAGACTGGTACGATGTCGNAGNATCCGNNCCTGATCNTGCTGNGGGCTGN
NNTGCACTGTGTGNAGCNNNACGGCGACTAAATACTTGGTTTTGNATTGGANGTGCCGACGTCATGCTGGGGTGAANGTG
CCTGTG

```

```

>PK_329142-516_3_pROK2-Rv_B06.ab1/>ben1_R_pNOS-BST
NNNNNNNNNNNNANNNNCNNNNNCNCGNNNNNNNNNNNCCNCCNCCNNAANNNNCNNNATAAGCCNGCGNTAGCNCNGN
CCTGNANNNNTTCNNANCACCGGACNNATCGGCCCTNGANNNNNNNACCAGGANNCCCCTGCNCTGACAACCGGAACACGG
NGGCATCANANCAGNNGATNGTCTGTTGTACCNANNGNTAGCCNATTAACCTTCTCCCCCAANCGNCCCGGAAAACCT
GCGTACAATCCATCTTGTTCATATACGAAACGATCCAGATCCGGTACAGATTATTTGAATTGAGAGTGAATATNANAC
TCTAATTGAATACCGANAAAANNNTNATGGAACGTCNNGNNAANATTTTTGNNAAAAAATATTTGCTANCTGATAGTAAC
CTTAGACGACTTTTGAACGCGCAATANTAAATTTCCGACGTATGTACTTAACTCATTAACCTCNAAAAANNAAN

```
