# Supplementary material for: The ben1-1 Brassinosteroid-Catabolism Mutation Is Unstable Due to Epigenetic Modifications of the Intronic T-DNA Insertion
Source: PubMed Central journal article supplement (PMC3755919; doi:10.1534/g3.113.006353), 2013-09-01
Supplement: supp_g3.113.006353_FileS4.pdf [file supp_g3.113.006353_FileS4.pdf]

*NPTII* gene sequencing V2

GTTACCCGCAATATATCCTGTCAAACACTGATAGTTTAAACTGAAGGCGGGAAACGACAATCTGATCATGAGCGGAGAATTAAGGGAGTCACGT  
 TATGACCCCGCCGATGACGCGGGACAAGCCGTTTTACGTTTGAAGTACAGAAACCGCAACGTTGAAGGAGCCACTCAGCCG/CGGGTTTCTGGA  
 GTTAAATGAGCTAAGCACATACGTCAGAAACCATTATTGCGGTTCAAAGTGCCTAAGTCACTATCAGCTAGCAAATATTTCTGTCAAAAATG  
 CTCCACTGACGTTCCATAAATCCCTCGGTATCCAATTAGAGTCTCATATCACTCTCAATCCAAATAATCTGCACCGGATCTGGATCGTTTCGCATG  
 ATTGAACAAGATGGATTGCACGCAGGTTCTCCGGCCGCTTGGGTGGAGAGGCTATTCGGCTATGACTGGGCACAACAGACAATCGGCTGCTCTGA  
 TGCCGCCGTGTTCCGGCTGTGACGCGAGGGGCGCCCGTTCTTTTGTCAAGACCGACCTGTCGGGTGCCCTGAATGAACTGCAGGACGAGGCAG  
 CGCGGCTATCGTGGCTGGCCACGACGGGCGTTCTTGCAGCTGTGCTCGACGTTGCTACTGAAGCGGGAAGGGACTGGCTGCTATTGGGCGAA  
 GTGCCGGGGCAGGATCTCTGTCATCTCACCTGCTCCTGCCGAGAAAGTATCCATCATGGCTGATGCAATGCGGCGGCTGCATACGCTTGATCCG  
 GCTACCTGCCATTGACCACCAAGCGAAACATCGCATCGAGCGAGCACGTAAGGCTGGAAGCCGGTCTTGTGATCAGGATGATCTGGACGA  
 AGAGCATCAGGGGCTCGCGCCAGCCGAAGTTCGCCAGGCTCAAGGCGCGCATGCCCGACGGCGATGATCTCGTCGTGACCCATGGCGATGCCT  
 GCTTGCCGAATATCATGGTGGAAAATGGCCGCTTTTCTGGATTTCATCGACTGTGGCCGGCTGGGTGTGGCGGACCGCTATCAGGACATAGCGTTG  
 GCTACCCGTGATATTGCTGAAGAGCTTGGCGGCGAATGGGCTGACCGCTTCTCGTGCTTTACGGTATCGCCGCTCCCGATTGCGAGCGCATCGCCT  
 TCTATCGCCTTCTTGACGAGTTCTTCTGAGCGGGACTCTGGGTTGCAAATGACCGACCAAGCGACGCCAACCTGCCATCACGAGATTTCGATTCC  
 ACCGCCGCTTCTATGAAAGGTTGGGCTTCGGAATCGTTTTCCGGGACGCGGCTGGATGATCCTCCAGCGCGGGGATCTCATGCTGGAGTTCTTC  
 GCCACGGGATCTCTGCGGAACA

>ben1\_O\_NPTII-F1

NNNNNNNACNTNNNNGAGCCACTCAGCCGCGGGTTTCTGGAGTTAATGAGCTAAGCACATACGTCAGAAACCATTATTG  
 CGCGTTCAAAGTGCCTAAGGTCACTATCAGCTAGCAAATATTTCTTGTCAAAAATGCTCCACTGACGTTCCATAAATT  
 CCCCTCGGTATCCAATTAGAGTCTCATATCACTCTCAATCCAAATAATCTGCACCGGATCTGGATCGTTTCGCATGATT  
 GAACAAGATGGATTGCACGCAGGTTCTCCGGCCGCTTGGGTGGAGAGGCTATTCGGCTATGACTGGGCACAACAGACAAT  
 CGGCTGCTCTGATGCCGCCGTGTTCCGGCTGTGACGCGAGGGGCGCCCGTTCTTTTGTCAAGACCGACCTGTCCGGTG  
 CCCTGAATGAACTGCAGGACGAGGCAGCGCGGCTATCGTGGCTGGCCACGACGGGCGTTCCCTTGCAGCTGTGCTCGAC  
 GTTGTCACTGAAGCGGGAAGGGACTGGCTGCTATTGGGCGAAGTGCAGGGGCGAGGATCTCCTGTCATCTCACCTTGCTCC  
 TGCCGAGAAAAGTATCCATCATGGCTGATGCAATGCGGCGGCTGCATACGCTTGATCCGGCTACCTGCCATTTCGACCACC  
 AAGCGAAACATCGCATCGAGCGAGCACGTAAGGCTGGAAGCCGGTCTTGTGATCAGGATGATCTGGACGAAGAGCAT  
 CAGGGGCTCGCGCCAGCCGAAGTTCGCCAGGCTCAAGGCGCGCATGCCCGACGGCGATGATCTCGTCGTGACCCATGG  
 CGATGCCTGCTTGCCGAATATCATGGTGGAAAATGGCCGCTTTTCTGGATTTCATCGACTGTGGCCGGCTGGGTGTGGCGG  
 ACCGCTATCNGACATAGCGTTGGCTACCCGTGATATTGCTGAAGAGCTTGGCGGCGAATGGGCTGACCGCTTCTCGTGC  
 TTTACGGTATCGCCGCTCCCGATTTCGAGCGCATCNCCTTCTATCGCCTNCTTGACNAGTTCTTCTGANCGNNNNNNNN  
 NNGGGGNNNNNNNNNNNNNNNNNNNNNNAAAAAGNAN

>ben1\_R\_NPTII-F1

NNNNNNNACNTNNNANGANCCNCTCAGCCGCGGGTTTCTGGAGTTAATGAGCTAAGCACATACGTCAGAAACCATTATTG  
 CGCGTTCAAAGTGCCTAAGGTCACTATCAGCTAGCAAATATTTCTTGTCAAAAATGCTCCACTGACGTTCCATAAATT  
 CCCCTCGGTATCCAATTAGAGTCTCATATCACTCTCAATCCAAATAATCTGCACCGGATCTGGATCGTTTCGCATGATT  
 GAACAAGATGGATTGCACGCAGGTTCTCCGGCCGCTTGGGTGGAGAGGCTATTCGGCTATGACTGGGCACAACAGACAAT  
 CGGCTGCTCTGATGCCGCCGTGTTCCGGCTGTGACGCGAGGGGCGCCCGTTCTTTTGTCAAGACCGACCTGTCCGGTG  
 CCCTGAATGAACTGCAGGACGAGGCAGCGCGGCTATCGTGGCTGGCCACGACGGGCGTTCCCTTGCAGCTGTGCTCGAC  
 GTTGTCACTGAAGCGGGAAGGGACTGGCTGCTATTGGGCGAAGTGCAGGGGCGAGGATCTCCTGTCATCTCACCTTGCTCC  
 TGCCGAGAAAAGTATCCATCATGGCTGATGCAATGCGGCGGCTGCATACGCTTGATCCGGCTACCTGCCATTTCGACCACC  
 AAGCGAAACATCGCATCGAGCGAGCACGTAAGGCTGGAAGCCGGTCTTGTGATCAGGATGATCTGGACGAAGAGCAT  
 CAGGGGCTCGCGCCAGCCGAAGTTCGCCAGGCTCAAGGCGCGCATGCCCGACGGCGATGATCTCGTCGTGACCCATGG  
 CGATGCCTGCTTGCCGAATATCATGGTGGAAAATGGCCGCTTTTCTGGATTTCATCGACTGTGGCCGGCTGGGTGTGGCGG  
 ACCGCTATCNGACATAGCGTTGGCTACCCGTGATATTGCTGAAGAGCTTGGCGGCGAATGGGCTGACCGCTTCTCGTGC  
 TTTACGGTATCGCCGCTCCCGATTTCNAGCGCATCGCCTTCTATCGCCTTCTTGACGANTTCTTCTGANCGNNGNNNNNNN  
 NNNNNNGGNNNGNNNNNNNNNAA

>ben1\_O\_NPTII-F2

NNNNNNNNGGGCGGNNNGCNNNNNNNCNNNNNTCCGGCTNACCTNNCCATTTCGACCACCAAGCGAAACATCGCATCGAG  
CGAGCACGTACTCGGATGGAAGCCGGTCTTGTGATCAGGATGATCTGGACGAAGAGCATCAGGGGCTCGCGCCAGCCGA  
ACTGTTCCGAGGCTCAAGGCGCGCATGCCGACGGCGATGATCTCGTGTGACCCATGGCGATGCCTGCTTGCCGAATA  
TCATGGTGAAAATGGCCGCTTTTCTGGATTTCATCGACTGTGGCCGGCTGGGTGTGGCGGACCGCTATCAGGACATAGCG  
TTGGCTACCCGTGATATTGCTGAAGAGCTTGGCGGCAATGGGCTGACCGCTTCTCTGCTGTTTACGGTATCGCCGCTCC  
CGATTTCGAGCGCATCGCCTTCTATCGCCTTCTTGACGAGTTCTTCTGAGCGGGACTCTGGGGNNGAAAATGAAAGAACCC  
CCTCCNNACCTTCCCCCGGATGGGGGNCGAGGGAGCTGATCGCCANGNGGNNNCCANCNNNNNANNACAANCCNCCGGCTT  
GTGCTNNTTTTNNNCNNNNNTTGTGGTTATTTCNNANNNNTCNCNNNCCNNANNANTCATCNTNCTCACNNCACCNNNNN  
NNCNCNNNNNTGTTGTTTTTNTTCTGATTGTTGATCANNNNNCTAANNAGCNGGCTNNTTTTCTTNNNNCAGAGNNNAA  
NNAACACGCCNACNNCATNCNCNCCNNTTANTCNNTCTTCAGANACGANNTCANNNNNACAAACTNNNNNNGCGCNANAN  
ANANNATNTATCNCNNNACTCNNNNCTNGAAATANNNTACGANNNNNANANNAAAAANCANCCCTCTTGCGTGGNTNTN  
NACGAGAGTNNNTAGNNNNCNNNNCGNAAAAATNNNNNANACANNANAGNNNNNTGNNTTNATANNCGNCTANTNNTNGG  
ANNNNTNNGTNATCNANNTTNTNANNNNTNNNTGTTCNCTNTGNGCCTGAATTTCNCTNTNNTCCCCCNCNNNNNTNNNN  
NNCNGGCTATCNGGCNNNTTNTTTNTACNNTTNTGGAGGGAAGNNNNNNNNNNNNNNNNNN

>ben1\_R\_NPTII-F2

NNNNNNNNGCGGNNNNNNNNNNNNNNNCNNNNNCCGNNTNACNTNNCCATTTCGACCACCAAGCGAAACATCGCATC  
GAGCGAGCACGTACTCGGATGGAAGCCGGTCTNNGTCGATCAGGATGATCTGGACGAAGAGCATCAGGGGCTCGCGCCAG  
CCGAAGTTCGCCAGGCTCAAGGCGCGCATGCCGACGGCGATGATCTCGTGTGACCCATGGCGATGCCTGCTTGCCG  
AATATCATGGTGAAAATGGCCGCTTTTCTGGATTTCATCGACTGTGGCCGGCTGGGTGTGGCGGACCGCTATCAGGACAT  
AGCGTTGGCTACCCGTGATATTGCTGAAGAGCTTGGCGGCAATGGGCTGACCGCTTCTCTGCTGTTTACGGTATCGCCG  
CTCCCGATTTCGAGCGCATCGCCTTCTATCGCCTTCTTGACGAGTTCTTCTGAGCGGGACTCTGGGGNNCNAAATGAANN  
CATCATCNNTCNNNNNGACNGGTGGNGGGACNGNGTGCAGTAGCNAAGNCTAACAATAACATGACCATCTCGNNGGAG  
CTTTTTTCCACTTGAGAGACATTNCTTTTTGGCTGTACNNCNCCTTNNNCCCTCCCATCATCTTTNNGCANCNCNGCCAA  
NTNCTNCTNCTCCTTTTTGNTTCTNNTTNTNNTCNCANCNNNTGGGCTGGCCNGGNGTCTCTTGTNTACTANGNNGNN  
TGGACGGACCCGNNNNNNNGGGTTCCGNTTCNNTANAAAANCGTACCTNNNNGNNGCANNAGGGNNNNNGCCCCAANNNG  
NAAAAANTCTTCGTNCTNNNCCCCGNANNAAGNNNNATGNNCNAATANANANGACNGGCAAAAANGGNGNCNCTN  
NNNNGGNANTCNNNNNNNGGAGGGNCGGNGNNGGGTCNNGGNNNNAACNTNTTCNCAANNNNNNAANNNNNTGNNNC  
CCCNNNGNTNANTGNNTNGAANGANTTTTGTCTNCTNNTTGGGNNNNNATCTNNNTTNCNCTNNGGTTTNTANNNGNN  
NNNNCCNCTCTCNCANNNNANTNNNNNAAGCNNNTANNNNGGGTTTTNNTTNNNNNTTTTTNNNNNCGNNANNTTNTNN  
TNNCNTNNNNNNNNNNNNNNNNNNTNNNNNGGGGNNNTTTTTNNGGNAAAAATGNNNANNNNNNNNN

ben1\_O\_NPTII-F1 NNNNNNACNTNNNNGAGCCACTCAGCCGCGGGTTTTCTGGAGTTTAAATGAGCTAAGCACA  
ben1\_R\_NPTII-F1 NNNNNNACNTNNANGANCCNCTCAGCCGCGGGTTTTCTGGAGTTTAAATGAGCTAAGCACA  
\*\*\*\*\* \*\* \* \*\*\*\*\*

ben1\_O\_NPTII-F1 TACGTCAGAAACCATTATTGCGCGTTCAAAGTTCGCTAAGGTCACTATCAGCTAGCAAA  
ben1\_R\_NPTII-F1 TACGTCAGAAACCATTATTGCGCGTTCAAAGTTCGCTAAGGTCACTATCAGCTAGCAAA  
\*\*\*\*\*

ben1\_O\_NPTII-F1 TATTTCTTGTCAAAAATGCTCCACTGACGTTCCATAAATCCCCTCGGTATCCAATTAGA  
ben1\_R\_NPTII-F1 TATTTCTTGTCAAAAATGCTCCACTGACGTTCCATAAATCCCCTCGGTATCCAATTAGA  
\*\*\*\*\*

ben1\_O\_NPTII-F1 GTCTCATATTCACTCTCAATCCAAATAATCTGCACCGGATCTGGATCGTTTCGCATGATT  
ben1\_R\_NPTII-F1 GTCTCATATTCACTCTCAATCCAAATAATCTGCACCGGATCTGGATCGTTTCGCATGATT  
\*\*\*\*\*

ben1\_O\_NPTII-F1 GAACAAGATGGATTGCACGCAGGTTCTCCGGCCGCTTGGGTGGAGAGGCTATTTCGGCTAT  
ben1\_R\_NPTII-F1 GAACAAGATGGATTGCACGCAGGTTCTCCGGCCGCTTGGGTGGAGAGGCTATTTCGGCTAT  
\*\*\*\*\*

```

ben1_O_NPTII-F1 GACTGGGCACAACAGACAATCGGCTGCTCTGATGCCGCCGTGTTCCGGCTGTCAGCGCAG
ben1_R_NPTII-F1 GACTGGGCACAACAGACAATCGGCTGCTCTGATGCCGCCGTGTTCCGGCTGTCAGCGCAG
*****

ben1_O_NPTII-F1 GGGCGCCCGGTTCTTTTGTCAAGACCGACCTGTCCGGTGCCCTGAATGAACTGCAGGAC
ben1_R_NPTII-F1 GGGCGCCCGGTTCTTTTGTCAAGACCGACCTGTCCGGTGCCCTGAATGAACTGCAGGAC
*****

ben1_O_NPTII-F1 GAGGCAGCGCGGCTATCGTGGCTGGCCACGACGGGCGTTCCTTGCGCAGCTGTGCTCGAC
ben1_R_NPTII-F1 GAGGCAGCGCGGCTATCGTGGCTGGCCACGACGGGCGTTCCTTGCGCAGCTGTGCTCGAC
*****

ben1_O_NPTII-F1 GTTGTCACTGAAGCGGGAAGGGACTGGCTGCTATTGGGCGAAGTGCCGGGGCAGGATCTC
ben1_R_NPTII-F1 GTTGTCACTGAAGCGGGAAGGGACTGGCTGCTATTGGGCGAAGTGCCGGGGCAGGATCTC
*****

ben1_O_NPTII-F1 CTGTCATCTCACCTTGCTCCTGCCGAGAAAGTATCCATCATGGCTGATGCAATGCGGGCG
ben1_R_NPTII-F1 CTGTCATCTCACCTTGCTCCTGCCGAGAAAGTATCCATCATGGCTGATGCAATGCGGGCG
*****

ben1_O_NPTII-F1 CTGCATACGCTTGATCCGGCTACCTGCCCATTCGACCACCAAGCGAAACATCGCATCGAG
ben1_R_NPTII-F1 CTGCATACGCTTGATCCGGCTACCTGCCCATTCGACCACCAAGCGAAACATCGCATCGAG
*****

ben1_O_NPTII-F1 CGAGCACGTACTCGGATGGAAGCCGGTCTTGTTCGATCAGGATGATCTG GACGAAGAGCAT
ben1_R_NPTII-F1 CGAGCACGTACTCGGATGGAAGCCGGTCTTGTTCGATCAGGATGATCTG GACGAAGAGCAT
*****

ben1_O_NPTII-F1 CAGGGGCTCGCGCCAGCCGAAGTGTTCGCCAGGCTCAAGGCGCGCATGCCCGACGGCGAT
ben1_R_NPTII-F1 CAGGGGCTCGCGCCAGCCGAAGTGTTCGCCAGGCTCAAGGCGCGCATGCCCGACGGCGAT
*****

ben1_O_NPTII-F1 GATCTCGTCGTGACCCATGGCGATGCCTGCTTGCCGAATATCATGGTGGAAAATGGCCGC
ben1_R_NPTII-F1 GATCTCGTCGTGACCCATGGCGATGCCTGCTTGCCGAATATCATGGTGGAAAATGGCCGC
*****

ben1_O_NPTII-F1 TTTTCTGGATTTCATCGACTGTGGCCGGCTGGGTGTGGCGACCCTATCNNNCATAGCGT
ben1_R_NPTII-F1 TTTTCTGGATTTCATCGACTGTGGCCGGCTGGGTGTGGCGACCCTATCNNGACATAGCGT
*****

ben1_O_NPTII-F1 TGGCTACCCGTGATATTGCTGAAGAGCTTGGCGGCGAATGGGCTGACCGCTTCCTCGTGC
ben1_R_NPTII-F1 TGGCTACCCGTGATATTGCTGAAGAGCTTGGCGGCGAATGGGCTGACCGCTTCCTCGTGC
*****

ben1_O_NPTII-F1 TTTACGGTATCGCCGCTCCCGATTTCGACGCGCATCNCCTTCTATCGCCTNCTTGACNAGT
ben1_R_NPTII-F1 TTTACGGTATCGCCGCTCCCGATTTCGACGCGCATCNCCTTCTATCGCCTTCTTGACGANT
*****

ben1_O_NPTII-F1 TCTTCTGANCGGNNNNNNNNNNGGGNNNNNNNNNNNNNNNNNAAAAGNAN
ben1_R_NPTII-F1 TCTTCTGANCGGNNNNNNNNNNNNNNNNGGNNGNNNANNNNNAA-----
*****

ben1_O_NPTII-F2 -NNNNNNNGNGGCGGNNGCNNNNNNCNNNNNTCCGGCTNACCTNCCATT--CGACC
ben1_R_NPTII-F2 NNNNNNNNGCGGNNNNNNNNNNNNNNNNCNNNNNNCCGNNTNACNTNCCATTTCGACC
*****

```

```

ben1_O_NPTII-F2 ACCAAGCGAAACATCGCATCGAGCGAGCACGTACTCGGATGGAAGCCGGTCTTG-TCGAT
ben1_R_NPTII-F2 ACCAAGCGAAACATCGCATCGAGCGAGCACGTACTCGGATGGAAGCCGGTCTNNGTCGAT
*****

ben1_O_NPTII-F2 CAGGATGATCTGGACGAAGAGCATCAGGGGCTCGCGCCAGCCGAACTGTTTCGCCAGGCTC
ben1_R_NPTII-F2 CAGGATGATCTGGACGAAGAGCATCAGGGGCTCGCGCCAGCCGAACTGTTTCGCCAGGCTC
*****

ben1_O_NPTII-F2 AAGGCGCGCATGCCCGACGGCGATGATCTCGTCGTGACCCATGGCGATGCCTGCTTGCCG
ben1_R_NPTII-F2 AAGGCGCGCATGCCCGACGGCGATGATCTCGTCGTGACCCATGGCGATGCCTGCTTGCCG
*****

ben1_O_NPTII-F2 AATATCATGGTGGAAAATGGCCGCTTTTCTGGATTCATCGACTGTGGCCGGCTGGGTGTG
ben1_R_NPTII-F2 AATATCATGGTGGAAAATGGCCGCTTTTCTGGATTCATCGACTGTGGCCGGCTGGGTGTG
*****

ben1_O_NPTII-F2 GCGGACCGCTATCAGGACATAGCGTTGGCTACCCGTGATATTGCTGAAGAGCTTGGCGGC
ben1_R_NPTII-F2 GCGGACCGCTATCAGGACATAGCGTTGGCTACCCGTGATATTGCTGAAGAGCTTGGCGGC
*****

ben1_O_NPTII-F2 GAATGGGCTGACCGCTTCCTCGTGCTTTACGGTATCGCCGCTCCCGATTCGCAGCGCATC
ben1_R_NPTII-F2 GAATGGGCTGACCGCTTCCTCGTGCTTTACGGTATCGCCGCTCCCGATTCGCAGCGCATC
*****

ben1_O_NPTII-F2 GCCTTCTATCGCCTTCTTGACGAGTTCTTCTGAGCGGGACTCTGGGGNN-GAAATGAAAG
ben1_R_NPTII-F2 GCCTTCTATCGCCTTCTTGACGAGTTCTTCTGAGCGGGACTCTGGGGNNCNAATGAAANN
*****

```
