# Supplementary material for: The ben1-1 Brassinosteroid-Catabolism Mutation Is Unstable Due to Epigenetic Modifications of the Intronic T-DNA Insertion
Source: PubMed Central journal article supplement (PMC3755919; doi:10.1534/g3.113.006353), 2013-09-01
Supplement: supp_g3.113.006353_TableS1.pdf [file supp_g3.113.006353_TableS1.pdf]

**Table S1 Table of PCR primer sequences used in the study.**

| <b>Primer Name</b> | <b>Primer Sequences</b>           |
|--------------------|-----------------------------------|
| GSP1               | 5'-TTTATATCTTCGTCGTTGCCT-3'       |
| GSP2               | 5'-ACCTTTTGCAACTGGCTTTT-3'        |
| LBb1.3             | 5'-ATTTTGCCGATTTTCGGAAC-3'        |
| PRT1               | 5'-ATGGTGAGAGAAGAACAAGA-3'        |
| PRT2               | 5'-TTAAAGAAATCCCCTTGCTTG-3'       |
| PQ1                | 5'-ATCTCTCGCCATGCTCTTTG-3'        |
| PQ2                | 5'-CTTCATCTCCACCGACGAAC-3'        |
| UBQ1               | 5'-GAAATGCATGGAGACGGATT-3'        |
| UBQ2               | 5'-TTGGTCTCTGCTCCCACTCT-3'        |
| ACTIN2 RT-F        | 5'-GGTCGTACAACCGGTATTGTGCTGG-3'   |
| ACTIN2 RT-R        | 5'-CTGTGAACGATTCTGGACCTGCC-3'     |
| PQ3                | 5'-TCTAAACAAGGAATTCGAGGTC-3'      |
| PQ4                | 5'-AACCAGAAATGTAGCACCGT-3'        |
| NPT-Fv1/MT1        | 5'-ACAAGCCGTTTTACGTTTGG-3'        |
| NPT-Rv             | 5'-TCATTTCGAACCCAGAGTC-3'         |
| MT2                | 5'-ATACTTTCTCGGCAGGAGCA-3'        |
| MT3                | 5'-TTCGCAAGACCCTTCTCTA-3'         |
| MT4                | 5'-GTTTTCCAGTCACGACGTT-3'         |
| NPT-Fv2            | 5'-TGCTCCTGCCGAGAAAGTAT-3'        |
| pNOS-BS-F          | 5'-GGGTTTTYTGAGTTTAATGAGYTAAG-3'  |
| pNOS-BS-R          | 5'-CACTTCRCCAATARCARTCCCTTCC-3'   |
| pBEN1-BS-F         | 5'-GTATAGTAGTAAAAAAGAAGAAGAAG-3'  |
| pBEN1-BS-R         | 5'-CTTRTTCTTCTCTACCATTTTCTCTCT-3' |
| BEN1-E2-BS-F       | 5'-TTAGGAATTAAGGAGAAGAG-3'        |
| BEN1-E2-BS-R       | 5'-AATTAATACCAAAAAACATAAC-3'      |
